# Supplementary material for: The Caulobacter crescentus phage phiCbK: genomics of a canonical phage
Source: PubMed Central journal article supplement (PMC3556154; doi:10.1186/1471-2164-13-542), 2012-10-10
Supplement: 1471-2164-13-542-S1.pdf [file 1471-2164-13-542-S1.pdf]

**Table S1.** Predicted proteins, gene starts and annotations of *C. crescentus* phage phiCbK. Upstream sequence is the 25 bp of DNA sequence upstream of the start codon, with the predicted Shine-Dalgarno motif capitalized. S-D is the Shine-Dalgarno motif associated with the gene start, and spacing is the interval (in bp) between the S-D and start codon. Evidence includes detected conserved domains or motifs, BlastP and HHpred hits, and experimental or other evidence as detailed in the text.

| Protein name | Strand | Upstream Sequence       | Start Codon | S-D    | spacing | Predicted product                                 | Evidence                                                                                 |
|--------------|--------|-------------------------|-------------|--------|---------|---------------------------------------------------|------------------------------------------------------------------------------------------|
| CbK_gp001    | +      | tggcaaatcaAGGAGccgcg    | atg         | aggag  | 6       | hypothetical conserved protein                    |                                                                                          |
| CbK_gp002    | +      | cgatttcaAGGgttataacct   | atg         | agg    | 10      | hypothetical conserved protein                    |                                                                                          |
| CbK_gp003    | +      | ccagccctgtGAGGcctccg    | atg         | gagg   | 6       | hypothetical conserved protein                    |                                                                                          |
| CbK_gp004    | +      | ccggccaAGGAGcttcccgc    | atg         | aggag  | 9       | hypothetical conserved protein                    |                                                                                          |
| CbK_gp005    | +      | gcgcttcGGAGaaaaccgce    | atg         | ggag   | 9       | hypothetical conserved protein                    |                                                                                          |
| CbK_gp006    | +      | cttcaatgacGGGcggcccg    | gtg         | gggg   | 7       | hypothetical conserved protein                    |                                                                                          |
| CbK_gp007    | +      | ggccttcaAGGAGtccgcccc   | gtg         | aggag  | 8       | hypothetical conserved protein                    |                                                                                          |
| CbK_gp008    | +      | ctttcaAGGAttgctcccctc   | atg         | agga   | 11      | hypothetical conserved protein                    |                                                                                          |
| CbK_gp009    | +      | gcccgcAAAGGAtcgcagacc   | atg         | agga   | 9       | hypothetical conserved protein                    |                                                                                          |
| CbK_gp010    | +      | tcctcgaaAGGAtcgcagacc   | atg         | agga   | 9       | hypothetical conserved protein                    |                                                                                          |
| CbK_gp011    | +      | gacgacggGGAGGcgtgagcc   | gtg         | ggagg  | 8       | hypothetical conserved protein                    |                                                                                          |
| CbK_gp012    | +      | gcccgcAAAGGAttgagccgc   | atg         | agga   | 9       | hypothetical conserved protein                    |                                                                                          |
| CbK_gp013    | +      | ccctcgcaAGGAtcgcacccc   | atg         | agga   | 9       | hypothetical conserved protein                    |                                                                                          |
| CbK_gp014    | +      | ttgggcGGGgtcgcctccta    | atg         | gggg   | 10      | hypothetical novel protein                        |                                                                                          |
| CbK_gp015    | +      | catagaagAGGActaaaccca   | atg         | agga   | 9       | hypothetical conserved protein                    |                                                                                          |
| CbK_gp016    | +      | caaccgaaAGGccgcctaagcc  | atg         | agg    | 11      | hypothetical conserved protein                    |                                                                                          |
| CbK_gp017    | +      | cccgcaAGGAGcttaagacc    | atg         | aggagg | 9       | hypothetical conserved protein                    |                                                                                          |
| CbK_gp018    | +      | cttcccttcGGAGcttccaaa   | atg         | ggag   | 8       | hypothetical conserved protein                    |                                                                                          |
| CbK_gp019    | +      | ccccctctGGAtcgtcccc     | atg         | gga    | 9       | hypothetical conserved protein                    |                                                                                          |
| CbK_gp020    | +      | ggtcgcaAGGAGacaccccgac  | atg         | aggag  | 9       | hypothetical conserved protein                    |                                                                                          |
| CbK_gp021    | +      | cacgcaatcgAGGAGccctctc  | atg         | aggag  | 6       | hypothetical conserved protein                    |                                                                                          |
| CbK_gp022    | +      | tccgAGGAcggaagcaacgctc  | atg         | agga   | 13      | hypothetical conserved protein                    |                                                                                          |
| CbK_gp023    | +      | cgcccttGGAGttcccggacg   | atg         | ggag   | 10      | hypothetical conserved protein                    |                                                                                          |
| CbK_gp024    | +      | caacaaGAGGTaccgccctg    | atg         | gagg   | 10      | putative lipoprotein                              | LipoP                                                                                    |
| CbK_gp025    | +      | acgcttgtttGGAAAatactg   | atg         | gga    | 8       | hypothetical conserved protein                    |                                                                                          |
| CbK_gp026    | +      | acttcaaccctcAGGcgtaac   | atg         | agg    | 6       | hypothetical conserved protein                    |                                                                                          |
| CbK_gp027    | +      | caccagcaacAGGAttcattg   | atg         | gag    | 8       | hypothetical conserved protein                    |                                                                                          |
| CbK_gp028    | +      | catccccatcggaAGGcctg    | atg         | gagg   | 4       | hypothetical conserved protein                    |                                                                                          |
| CbK_gp029    | +      | ctacgagcgcgtGGAGGcccc   | gtg         | ggagg  | 4       | hypothetical conserved protein                    |                                                                                          |
| CbK_gp030    | +      | ggtcccctGGAGcgcgtgcc    | gtg         | ggag   | 8       | hypothetical conserved protein                    |                                                                                          |
| CbK_gp031    | +      | tcgcccgcAAAGGAGcgcgatcc | atg         | aggagg | 6       | hypothetical conserved protein                    |                                                                                          |
| CbK_gp032    | +      | gccccgcaAGGAGcgtgtctt   | ttg         | aggag  | 8       | hypothetical conserved protein                    |                                                                                          |
| CbK_gp033    | +      | agacgcgcctgaaAGGAcatac  | atg         | agga   | 4       | hypothetical conserved protein                    |                                                                                          |
| CbK_gp034    | +      | tcgcccgttaacgAGGAccccc  | atg         | agga   | 4       | hypothetical conserved protein                    |                                                                                          |
| CbK_gp035    | +      | ccctgatccacAGGcctgac    | atg         | gagg   | 6       | hypothetical conserved protein                    |                                                                                          |
| CbK_gp036    | +      | gggcatgaagaAGGcgaagtc   | atg         | agg    | 7       | hypothetical conserved protein                    |                                                                                          |
| CbK_gp037    | +      | gcgcGGACaaactggcgcgcgc  | atg         | gga    | 14      | hypothetical conserved protein                    |                                                                                          |
| CbK_gp038    | +      | ggcataAGGcgccttcagc     | ctg         | agg    | 11      | hypothetical conserved protein                    |                                                                                          |
| CbK_gp039    | +      | cgaaactgtGAGGccccattcg  | atg         | gagg   | 8       | hypothetical conserved protein                    |                                                                                          |
| CbK_gp040    | -      | gtaacctcaAGGAGtagcacc   | gtg         | aggag  | 7       | hypothetical conserved protein                    |                                                                                          |
| CbK_gp041    | -      | gacaactaaGGGgtgtcgatc   | atg         | gggg   | 8       | putative transglutaminase-like cysteine peptidase | IPR010319                                                                                |
| CbK_gp042    | +      | gcgacctcgaAGGcctctat    | ctg         | agg    | 8       | portal protein                                    | HHpred vs pdb70_18Aug12, hit 2jes_A, prob 99.9% E=4.9E-23; positional evidence, see text |
| CbK_gp043    | +      | cccgaaccgcAGGAcgcgccg   | atg         | agga   | 7       | hypothetical conserved protein                    |                                                                                          |
| CbK_gp044    | +      | aacctagcttgcaAGGtaaac   | atg         | gag    | 4       | hypothetical conserved protein                    |                                                                                          |
| CbK_gp045    | +      | ccgccccaaagaaagcgcctg   | atg         | None   | 0       | hypothetical conserved protein                    |                                                                                          |
| CbK_gp046    | +      | cctccagccttGAGGcgccccc  | gtg         | gagg   | 6       | hypothetical conserved protein                    |                                                                                          |
| CbK_gp047    | +      | gttaaccacGAGGgcttttcc   | atg         | gagg   | 8       | hypothetical conserved protein                    |                                                                                          |
| CbK_gp048    | +      | gctcctttcccaGAGGgctcc   | atg         | gagg   | 5       | hypothetical conserved protein                    |                                                                                          |
| CbK_gp049    | +      | cgaccgcgtgcGGGcaccctg   | atg         | gggg   | 6       | hypothetical conserved protein                    |                                                                                          |
| CbK_gp050    | +      | tccaagcttAGGAGccccgtcc  | atg         | aggag  | 7       | hypothetical conserved protein                    |                                                                                          |
| CbK_gp051    | +      | gatcacccgcctcgtcgagac   | gtg         | None   | 0       | hypothetical conserved protein                    |                                                                                          |
| CbK_gp052    | +      | gacctctacGAGagcagcgcg   | atg         | gag    | 6       | hypothetical conserved protein                    |                                                                                          |
| CbK_gp053    | +      | ggtgacctcaagGGAagacc    | gtg         | gga    | 6       | hypothetical conserved protein                    |                                                                                          |
| CbK_gp054    | +      | tcggctcGAGGAGGgtgacat   | ttg         | aggagg | 7       | hypothetical conserved protein                    |                                                                                          |
| CbK_gp055    | +      | gcgcgaaagccgccaagcgtcc  | atg         | None   | 0       | hypothetical conserved protein                    |                                                                                          |
| CbK_gp056    | +      | ttaaccatgacgggctccctg   | atg         | None   | 0       | hypothetical conserved protein                    |                                                                                          |
| CbK_gp057    | +      | gatgggcaAGGAGcgcctacca  | gtg         | aggag  | 8       | putative HD-domain/PDEase-like protein            | SSF109604                                                                                |
| CbK_gp058    | +      | aacgatacGAGaacaaccgct   | atg         | gag    | 10      | hypothetical conserved protein                    |                                                                                          |
| CbK_gp059    | +      | gctatctGGAGcgcctgagccg  | atg         | gga    | 11      | hypothetical conserved protein                    |                                                                                          |
| CbK_gp060    | +      | cctgccaagaAGGcgcctcg    | atg         | agg    | 7       | putative DHH phosphoesterase protein              | SSF64182                                                                                 |
| CbK_gp061    | +      | caagcgcggcgcGGGcagcgcg  | gtg         | gggg   | 5       | hypothetical conserved protein                    |                                                                                          |
| CbK_gp062    | +      | tttgccaacAGGAGatcgccg   | gtg         | aggag  | 7       | hypothetical conserved protein                    |                                                                                          |
| CbK_gp063    | +      | tteacgcaactctAGGAccccc  | atg         | agga   | 4       | hypothetical conserved protein                    |                                                                                          |
| CbK_gp064    | +      | gattacGAGGcctataccacc   | gtg         | gagg   | 11      | hypothetical conserved protein                    |                                                                                          |
| CbK_gp065    | +      | ttcgctcGAGGcctattctg    | atg         | gagg   | 9       | hypothetical conserved protein                    |                                                                                          |
| CbK_gp066    | +      | aagccgcccgcgcaacttcg    | atg         | None   | 0       | putative HNH endonuclease                         | IPR002711                                                                                |
| CbK_gp067    | +      | ccgtgggtGAGGaaagactgt   | atg         | gag    | 7       | hypothetical conserved protein                    |                                                                                          |
| CbK_gp068    | +      | cgtgacaaGAGaattccctcg   | gtg         | gag    | 10      | major capsid protein                              | experimental evidence, see text                                                          |
| CbK_gp069    | +      | atctaagcAGGAAatccccag   | atg         | agg    | 9       | minor capsid protein                              | experimental evidence, see text                                                          |
| CbK_gp070    | +      | cccccgaaacGGAAaatcccc   | atg         | gga    | 8       | hypothetical conserved protein                    |                                                                                          |

|           |   |                         |     |        |    |                                                                   |                                                                                                                                  |
|-----------|---|-------------------------|-----|--------|----|-------------------------------------------------------------------|----------------------------------------------------------------------------------------------------------------------------------|
| CbK_gp071 | + | aagccccgcgccctaaagcc    | atg | None   | 0  | hypothetical conserved protein                                    |                                                                                                                                  |
| CbK_gp072 | + | atccccAGGTgaaactaaagcc  | gtg | aggt   | 10 | hypothetical conserved protein                                    |                                                                                                                                  |
| CbK_gp073 | + | caactccgctaecgcttaagtc  | atg | None   | 0  | hypothetical conserved protein                                    |                                                                                                                                  |
| CbK_gp074 | + | ttcacgaaactaagGAGcggcc  | atg | gga    | 5  | hypothetical conserved protein                                    |                                                                                                                                  |
| CbK_gp075 | + | acccccAGGAGccctgaaacc   | atg | aggag  | 9  | hypothetical conserved protein                                    |                                                                                                                                  |
| CbK_gp076 | + | ccgcctcaAGGtctctcgcg    | ttg | agg    | 10 | putative lectin-like domain protein                               | IPR013320, IPR008985                                                                                                             |
| CbK_gp077 | + | cagacctGGAGccctaaagacc  | atg | ggagg  | 9  | hypothetical conserved protein                                    |                                                                                                                                  |
| CbK_gp078 | + | ttccgctcgcaGGGcgcgcgc   | gtg | gggg   | 6  | hypothetical conserved protein                                    |                                                                                                                                  |
| CbK_gp079 | + | tctGGAGtttcgagcggccatc  | atg | ggag   | 14 | hypothetical conserved protein                                    |                                                                                                                                  |
| CbK_gp080 | + | acgcaccgccAGGgcttttcc   | atg | agg    | 8  | hypothetical conserved protein                                    |                                                                                                                                  |
| CbK_gp081 | + | ctgcggtcgccGAGGcttcc    | atg | gagg   | 5  | hypothetical conserved protein                                    |                                                                                                                                  |
| CbK_gp082 | - | tctcaacctTAGGAGcaagctt  | atg | aggag  | 6  | hypothetical conserved protein                                    |                                                                                                                                  |
| CbK_gp083 | + | ggcggccgttcGAGagctatc   | atg | gag    | 5  | hypothetical conserved protein                                    |                                                                                                                                  |
| CbK_gp084 | + | agtGGGAGccgagagccgctc   | atg | gggg   | 13 | hypothetical conserved protein                                    |                                                                                                                                  |
| CbK_gp085 | + | tcctgggtGGAGttttcccta   | atg | ggag   | 9  | hypothetical conserved protein                                    |                                                                                                                                  |
| CbK_gp086 | + | cgccatccccagagGAGGcagc  | gtg | ggag   | 4  | putative PhoH-like protein                                        | IPR003714, SSF52540, G3DSA:3.40.50.300                                                                                           |
| CbK_gp087 | + | gtgacaaagacgtagcgcacc   | atg | None   | 0  | hypothetical conserved protein                                    |                                                                                                                                  |
| CbK_gp088 | + | caagaagatcttcgccaacta   | atg | None   | 0  | hypothetical conserved protein                                    |                                                                                                                                  |
| CbK_gp089 | + | cagcaccgCGGAaagaaccccc  | gtg | gga    | 10 | hypothetical conserved protein                                    |                                                                                                                                  |
| CbK_gp090 | + | ctcgattaaaGAGGTgttcgg   | atg | gaggt  | 6  | hypothetical conserved protein                                    |                                                                                                                                  |
| CbK_gp091 | + | gttttgctgggaGAGGactg    | atg | gagg   | 4  | hypothetical conserved protein                                    |                                                                                                                                  |
| CbK_gp092 | + | ccgtGGATgtgtgacctgcc    | atg | gga    | 14 | major tail tube protein                                           | experimental evidence, see text                                                                                                  |
| CbK_gp093 | + | cccgatacGGAatccccgaac   | atg | gga    | 10 | putative pre-tape measure chaperone protein                       | HHpred vs pdb70_18Aug12, hit 2ob9_A, prob 89.3% E=0.82; positional evidence, see text                                            |
| CbK_gp094 | + | cccgatacGGAatccccgaac   | atg | gga    | 10 | putative pre-tape measure chaperone protein, frameshifted version | positional evidence, see text; slippery sequence AAAAAAC                                                                         |
| CbK_gp095 | + | gcGGGccgcccagatagatca   | atg | gggg   | 15 | tail tape measure protein                                         | IPR007921, IPR013491, IPR013423; experimental evidence, see text                                                                 |
| CbK_gp096 | + | tcctttcatgtttaatgcgccg  | atg | None   | 0  | hypothetical conserved protein                                    | IPR011740                                                                                                                        |
| CbK_gp097 | + | ctggcaaaGAGccctgacgcc   | gtg | gagg   | 10 | virion-associated protein, putative tail protein                  | IPR019228, IPR018964, IPR011928; experimental evidence, see text                                                                 |
| CbK_gp098 | + | gccccacgctccCGAGcagga   | atg | ggag   | 5  | putative NlpC/P60 family cell wall peptidase                      | IPR000064, SSF54001, G3DSA:3.90.1720.10                                                                                          |
| CbK_gp099 | + | ccccggcgttgAGGActaatc   | atg | agga   | 6  | virion-associated protein, putative tail protein                  | IPR007110; experimental evidence, see text                                                                                       |
| CbK_gp100 | + | tgtcataaaaagtctgtgaaacg | atg | None   | 0  | hypothetical conserved protein                                    |                                                                                                                                  |
| CbK_gp101 | + | cctcaAGGcgctcatcctgca   | atg | agg    | 13 | virion-associated protein, putative tail protein                  | IPR000421, IPR008979, G3DSA:2.60.120.260; experimental evidence, see text                                                        |
| CbK_gp102 | + | accctcaagGGAatcccgatag  | atg | gga    | 9  | hypothetical conserved protein                                    |                                                                                                                                  |
| CbK_gp103 | + | ttctcatgtctGGAGccctgac  | atg | ggag   | 6  | hypothetical conserved protein                                    |                                                                                                                                  |
| CbK_gp104 | + | tcagcaacttccGAAatccacc  | atg | gga    | 7  | putative endolysin                                                | IPR002196, SSF53955, G3DSA:1.10.530.40                                                                                           |
| CbK_gp105 | + | ggccttcaAGGgctgctgctc   | atg | agg    | 10 | putative inner membrane spanin component                          | N-terminal TMD, outer membrane spanin component embedded in +1 frame, see text                                                   |
| CbK_gp106 | + | agtaaccaGAGGTtattcaag   | atg | gaggt  | 8  | putative outer membrane spanin component                          | lipoprotein embedded in inner membrane spanin component, see text                                                                |
| CbK_gp107 | + | caagctcaaAGGgcagaaagca  | gtg | agg    | 9  | putative holin protein                                            | predicted 4 TMDs, see text                                                                                                       |
| CbK_gp108 | + | cgctatcacGGAGtagggacc   | atg | ggag   | 8  | hypothetical conserved protein                                    |                                                                                                                                  |
| CbK_gp109 | - | cgacggcagcGAGGaaacgaa   | atg | aggag  | 6  | putative HTH domain DNA-binding protein                           | IPR001387, IPR010982, G3DSA:1.10.260.40                                                                                          |
| CbK_gp110 | - | ttaaaccaGAGGcccgaaata   | atg | gagg   | 10 | putative dUTP pyrophosphatase                                     | IPR008181, IPR008180, SSF51283, PTHR11241, G3DSA:2.70.40.10                                                                      |
| CbK_gp111 | - | tccttttctGAGaccctctc    | atg | gag    | 8  | putative ribonucleoside diphosphate reductase beta subunit        | IPR012348, IPR012335, IPR000358, IPR002109, IPR009078, IPR012336, IPR011767                                                      |
| CbK_gp112 | - | tcgacgcGAGaaacGAGacc    | atg | gag    | 5  | putative ribonucleoside diphosphate reductase alpha subunit       | IPR006141, IPR003587, IPR000788, IPR013509, IPR008926, SSF51294, SSF51998, G3DSA:2.170.16.10, G3DSA:3.20.70.20                   |
| CbK_gp113 | - | cggttggtGGGGtgcctggcg   | ttg | gggg   | 9  | hypothetical conserved protein                                    |                                                                                                                                  |
| CbK_gp114 | - | tcctcatgcaagcAGGAtcc    | atg | agga   | 5  | hypothetical conserved protein                                    |                                                                                                                                  |
| CbK_gp115 | - | acgacatcaaccGAGcccgagc  | atg | ggag   | 6  | hypothetical conserved protein                                    |                                                                                                                                  |
| CbK_gp116 | - | gacgcgcaaccAGGActgacc   | atg | agga   | 7  | putative thymidylate synthase                                     | IPR003669                                                                                                                        |
| CbK_gp117 | - | atccttcgctAGGAGaaacccc  | atg | aggag  | 6  | putative dNMP kinase                                              | HHpred vs pdb70_18Aug12, hit 2grj_A, prob 100% E=7.4E-28; SSF52540, G3DSA:3.40.50.300                                            |
| CbK_gp118 | - | aagatacaAGGAcggycaaccc  | ctg | agga   | 10 | putative RecD-like helicase                                       | HHpred vs pdb70_18Aug12, hit 3e1s_A, prob 100% E=1.3E-45; SSF52540, G3DSA:3.40.50.300                                            |
| CbK_gp119 | - | acagaaaaatAGGTatcaagca  | atg | aggt   | 8  | hypothetical conserved protein                                    |                                                                                                                                  |
| CbK_gp120 | - | aGAGaaatgtgacgctgcgccc  | atg | gag    | 17 | hypothetical conserved protein                                    |                                                                                                                                  |
| CbK_gp121 | - | actccgcaacGAGatcgccc    | atg | gag    | 8  | putative exoribonuclease, Pol III-like                            | IPR006055, IPR013520, IPR012337, G3DSA:3.30.420.10                                                                               |
| CbK_gp122 | - | caactgggcGAGGacgcaactg  | atg | ggag   | 8  | hypothetical conserved protein                                    |                                                                                                                                  |
| CbK_gp123 | - | atcaaatcctcaAGGTgctcc   | atg | aggt   | 5  | putative Pol I DNA polymerase, T7-like                            | IPR001098, IPR012337, SSF56672, PTHR10133, G3DSA:1.10.150.20, G3DSA:1.20.1060.10, G3DSA:3.30.420.10, G3DSA:3.30.70.370; see text |
| CbK_gp124 | - | acatccgcttaaccatagagcc  | atg | None   | 0  | putative DNA cytosine methyltransferase                           | IPR001525, IPR018117, SSF53335, PTHR10629:SF11, G3DSA:3.40.50.150, G3DSA:3.90.120.10                                             |
| CbK_gp125 | - | ggcgctctgtaagcGAGGtccc  | atg | gagg   | 4  | hypothetical conserved protein                                    |                                                                                                                                  |
| CbK_gp126 | - | gcgcgcaaacccGAGGcttctct | atg | ggag   | 7  | putative TS A1-like protein                                       | blastP to T5 A1 (AAU05157), E=2.81E-89, 34.2% Dice identity; HHpred vs pdb70_18Aug12, hit 1g2h_A, prob 94.0% E=0.049             |
| CbK_gp127 | - | tcgagatagccAGGAcaccgcc  | ctg | agga   | 5  | putative DNA methylase                                            | IPR002052, SSF53335, G3DSA:3.40.50.150                                                                                           |
| CbK_gp128 | - | aggctccgttcgcgGGAActtg  | ctg | gga    | 4  | hypothetical conserved protein                                    |                                                                                                                                  |
| CbK_gp129 | - | aaagatcgctatcgtttctgt   | atg | None   | 0  | hypothetical conserved protein                                    |                                                                                                                                  |
| CbK_gp130 | - | catcgcaaaAGGTcatggaac   | gtg | aggt   | 9  | hypothetical conserved protein                                    |                                                                                                                                  |
| CbK_gp131 | - | cgttaaccaacgctgcggcgccc | atg | None   | 0  | putative DNA helicase                                             | IPR014001, IPR001650, IPR000330, IPR014021, SSF52540, PTHR10799, G3DSA:3.40.50.300                                               |
| CbK_gp132 | + | ccggtcacaAGGAGaaactatc  | atg | aggag  | 7  | hypothetical conserved protein                                    |                                                                                                                                  |
| CbK_gp133 | + | ggaaatcaAGGAGaccgctgtg  | atg | agga   | 9  | hypothetical conserved protein                                    |                                                                                                                                  |
| CbK_gp134 | - | caaccgcaaaAGGccccctctg  | atg | agg    | 7  | hypothetical conserved protein                                    |                                                                                                                                  |
| CbK_gp135 | - | acccaGAGGTctcgcgctac    | ctg | gaggt  | 10 | hypothetical conserved protein                                    |                                                                                                                                  |
| CbK_gp136 | - | gccttttcaAGGATcgcttgc   | atg | agga   | 8  | hypothetical conserved protein                                    |                                                                                                                                  |
| CbK_gp137 | - | gccggtctcaAGGAGacgacc   | atg | aggag  | 6  | Putative rib-like protein                                         | PD130832                                                                                                                         |
| CbK_gp138 | - | gcctgcocttccGAGtttggcc  | atg | ggag   | 6  | putative rliA-like protein                                        | IPR003594                                                                                                                        |
| CbK_gp139 | + | ggcaaaactccgaaaAGGcAGGc | ttg | agg    | 1  | hypothetical conserved protein                                    |                                                                                                                                  |
| CbK_gp140 | + | gcctGAGGcatgctgctatc    | atg | gagg   | 13 | hypothetical conserved protein                                    |                                                                                                                                  |
| CbK_gp141 | + | cgtatggtacgcaAGGAtgac   | atg | agga   | 4  | hypothetical conserved protein                                    |                                                                                                                                  |
| CbK_gp142 | + | caaccgacggcgctcctccca   | ttg | None   | 0  | hypothetical conserved protein                                    |                                                                                                                                  |
| CbK_gp143 | + | acgacaaacAGGAGGctctc    | atg | aggagg | 5  | putative tyrosine recombinase                                     | IPR013762, IPR002104, IPR011010                                                                                                  |
| CbK_gp144 | + | gtcctcgataAGGAGGgcygcyg | atg | aggagg | 5  | hypothetical conserved protein                                    |                                                                                                                                  |

|           |   |                          |     |        |    |                                               |                                                               |
|-----------|---|--------------------------|-----|--------|----|-----------------------------------------------|---------------------------------------------------------------|
| CbK_gp145 | + | ccggttagtccAGGAGTacaagt  | ttg | aggag  | 6  | hypothetical conserved protein                |                                                               |
| CbK_gp146 | + | accoccgctcccgaAGGcttc    | atg | agg    | 4  | hypothetical conserved protein                |                                                               |
| CbK_gp147 | + | atcgcctcctGGGSccttttga   | gtg | gggg   | 8  | hypothetical conserved protein                |                                                               |
| CbK_gp148 | + | tcctgtacggttaagGGAaaac   | atg | gga    | 4  | hypothetical conserved protein                |                                                               |
| CbK_gp149 | + | acgattcGGAGTattcaatgaa   | atg | ggag   | 10 | putative HTH domain protein                   | IPR001387, G3DSA:1.10.260.40                                  |
| CbK_gp150 | + | cctgtattcctcAGGTTcccgc   | atg | gaggt  | 5  | putative tRNA amidotransferase domain protein | IPR019004, IPR003789                                          |
| CbK_gp151 | - | acttattcAGGGAaagtgtgag   | atg | gaggt  | 10 | putative DNA ligase                           | IPR012340, IPR016027, SSF56091, G3DSA:3.30.470.30             |
| CbK_gp152 | - | tcgatccAGGAGattttccgcg   | atg | ggag   | 10 | hypothetical conserved protein                |                                                               |
| CbK_gp153 | - | gccatccccctctatctccgag   | gtg | None   | 0  | hypothetical conserved protein                |                                                               |
| CbK_gp154 | - | gtttcAGGgcaaatgtcAGGA    | atg | agg    | 1  | DUF1643 protein                               | IPR012441                                                     |
| CbK_gp155 | - | gcctcgccttgaAGGAaggca    | atg | aggga  | 4  | hypothetical conserved protein                |                                                               |
| CbK_gp156 | - | gaagctaagaagcggggccacg   | gtg | None   | 0  | hypothetical conserved protein                |                                                               |
| CbK_gp157 | - | ctGGAtcgcctcccgccgctcg   | atg | gga    | 16 | hypothetical conserved protein                |                                                               |
| CbK_gp158 | - | gcttttgAGGAGTttgacgt     | atg | aggag  | 9  | hypothetical conserved protein                |                                                               |
| CbK_gp159 | - | agcaggactAGGAGaaagacc    | atg | aggag  | 7  | hypothetical conserved protein                |                                                               |
| CbK_gp160 | - | cgacgccaAGGAGcgtctgcca   | atg | aggga  | 9  | hypothetical conserved protein                |                                                               |
| CbK_gp161 | - | ggcccggtactAGGAGcgcctg   | atg | gag    | 8  | putative lipoprotein                          | LipoP                                                         |
| CbK_gp162 | - | cgcttaaaGGGGAacatc       | atg | gggg   | 8  | putative nicotinate phosphoribosyltransferase | IPR015977, IPR002638, PTHR11098                               |
| CbK_gp163 | - | caagaaagaGGGtaagcgata    | gtg | gggg   | 9  | putative NUDIX hydrolase domain protein       | IPR014729, IPR000086, IPR015797, SSF52374, P551462, PTHR22769 |
| CbK_gp164 | - | aatacaagaacccaaagcgta    | gtg | None   | 0  | hypothetical conserved protein                |                                                               |
| CbK_gp165 | - | cgcaacgcctgAGGAGcactg    | atg | gga    | 7  | putative peptidyl-tRNA hydrolase              | IPR002833, SSF102462, PTHR12649, G3DSA:3.40.1490.10           |
| CbK_gp166 | - | agcgcgcccgcgccAGGgctg    | atg | gagg   | 4  | hypothetical conserved protein                |                                                               |
| CbK_gp167 | - | taacctccaagcAGGAGaccgc   | atg | aggag  | 5  | hypothetical conserved protein                |                                                               |
| CbK_gp168 | - | acaacgcccAGGAGcccttttc   | atg | ggagg  | 8  | hypothetical conserved protein                |                                                               |
| CbK_gp169 | - | ccccgatctccAGGAagcccc    | atg | gag    | 7  | putative HD-domain/PDEase-like protein        | SSF109604                                                     |
| CbK_gp170 | - | gggagaattcctAGGAGgtcgc   | atg | gagg   | 5  | hypothetical conserved protein                |                                                               |
| CbK_gp171 | - | acgcccagaAGGAGctaactcct  | atg | aggga  | 8  | putative DNA-binding domain protein           | IPR016177, SSF54060                                           |
| CbK_gp172 | - | gaggctcAGGAGaagtaagcc    | atg | ggag   | 9  | hypothetical conserved protein                |                                                               |
| CbK_gp173 | - | tcctgagaAGGAacaaacctg    | atg | aggga  | 9  | hypothetical conserved protein                |                                                               |
| CbK_gp174 | - | tcaacaAGGgcaagaacgccc    | atg | agg    | 12 | hypothetical conserved protein                |                                                               |
| CbK_gp175 | - | caagcAGGcgcgcyggtctgct   | ttg | agg    | 13 | hypothetical conserved protein                |                                                               |
| CbK_gp176 | - | gctgttcgactAGGAaaaaatc   | gtg | ggag   | 6  | hypothetical conserved protein                |                                                               |
| CbK_gp177 | - | ctctgctgagaAGGgctAGGccc  | atg | agg    | 2  | hypothetical conserved protein                |                                                               |
| CbK_gp178 | - | acacccaagaAGGAGccccccc   | gtg | aggag  | 6  | putative RtcB-like protein                    | IPR001233                                                     |
| CbK_gp179 | - | taaccctcaAGGTTgatcccc    | atg | aggt   | 7  | hypothetical conserved protein                |                                                               |
| CbK_gp180 | - | aacaaagcaAGGAGcaaccccc   | ttg | aggag  | 7  | putative band 7 lipoprotein                   | IPR001107                                                     |
| CbK_gp181 | - | actcctgaaAGGcccgcgccca   | atg | agg    | 9  | hypothetical conserved protein                |                                                               |
| CbK_gp182 | - | gcaagcgcggctcgcgcgctcg   | atg | None   | 0  | hypothetical conserved protein                |                                                               |
| CbK_gp183 | - | acgacaacgaAGGAGcctccc    | atg | aggag  | 6  | hypothetical conserved protein                |                                                               |
| CbK_gp184 | - | caagatGGAGGccgcccacaa    | atg | ggagg  | 10 | hypothetical conserved protein                |                                                               |
| CbK_gp185 | - | tcagagccaAGGAGcgcctgat   | ttg | aggag  | 7  | hypothetical conserved protein                |                                                               |
| CbK_gp186 | - | cgcaagcgaAGGAGcccgatc    | atg | aggag  | 6  | hypothetical conserved protein                |                                                               |
| CbK_gp187 | - | gcactctgaaAGGAGaccacc    | atg | aggga  | 5  | hypothetical conserved protein                |                                                               |
| CbK_gp188 | - | ggctcctcgcGGAGcaaatcc    | atg | ggag   | 7  | hypothetical conserved protein                |                                                               |
| CbK_gp189 | - | tcctgaaAGGctcgacctcctg   | atg | agg    | 12 | hypothetical conserved protein                |                                                               |
| CbK_gp190 | - | cgttccaaactcgcAGGTctccc  | gtg | aggt   | 4  | hypothetical conserved protein                |                                                               |
| CbK_gp191 | - | cctgggctcAGGAGaagcaacct  | gtg | ggag   | 8  | hypothetical conserved protein                |                                                               |
| CbK_gp192 | - | gcccctatAGGAGcAGGcaagca  | gtg | gag    | 5  | hypothetical conserved protein                |                                                               |
| CbK_gp193 | - | gacgacaacgaAGGAGGccctg   | atg | aggagg | 5  | putative ArdC-like antirestriction protein    | IPR017113, IPR013610                                          |
| CbK_gp194 | - | cgccgcatataAGGAGcgcctg   | atg | gag    | 6  | hypothetical conserved protein                |                                                               |
| CbK_gp195 | - | ggcccgggAGGAGGcgcctc     | atg | ggagg  | 9  | hypothetical conserved protein                |                                                               |
| CbK_gp196 | - | cgccctgccaAGGAGcctcaagtc | atg | gag    | 9  | hypothetical conserved protein                |                                                               |
| CbK_gp197 | - | aacgacaaccagggAGGAGagcc  | gtg | ggag   | 4  | putative acyl carrier protein                 | IPR009081, IPR006163, PTHR20863                               |
| CbK_gp198 | - | tcgacaacggcaAGGAGcggct   | atg | aggga  | 5  | putative HNH endonuclease                     | IPR002711                                                     |
| CbK_gp199 | - | ctcaattcgttaAGGAGtcgacc  | atg | aggga  | 6  | hypothetical conserved protein                |                                                               |
| CbK_gp200 | - | gcttctcgggctatcaaaaccg   | atg | None   | 0  | hypothetical conserved protein                |                                                               |
| CbK_gp201 | - | tgggAGGaaagctgaaagtgaagc | atg | ggag   | 14 | hypothetical conserved protein                |                                                               |
| CbK_gp202 | - | gccttcAGGAGTgcaagcctg    | atg | gaggt  | 9  | hypothetical conserved protein                |                                                               |
| CbK_gp203 | - | tcgagacctcAGGAGaaggccc   | gtg | ggag   | 7  | hypothetical conserved protein                |                                                               |
| CbK_gp204 | - | gcggttcAGGAGGatcgaggg    | ttg | aggag  | 8  | hypothetical conserved protein                |                                                               |
| CbK_gp205 | - | gacgacaacgggaAGGAaccct   | atg | aggga  | 5  | hypothetical conserved protein                |                                                               |
| CbK_gp206 | - | cggtgacttcgccaAGGgagac   | atg | agg    | 4  | hypothetical conserved protein                |                                                               |
| CbK_gp207 | - | gcgagcaaccgaAGGAGcgaactg | atg | aggt   | 6  | hypothetical conserved protein                |                                                               |
| CbK_gp208 | - | gacgacaacgaAGGAGGcctccc  | atg | aggagg | 5  | hypothetical conserved protein                |                                                               |
| CbK_gp209 | - | ctacgtGGAGagccggcgccgc   | atg | ggag   | 11 | hypothetical conserved protein                |                                                               |
| CbK_gp210 | - | cgccgcaatttcAGGAGtgacc   | atg | ggag   | 5  | hypothetical conserved protein                |                                                               |
| CbK_gp211 | - | ggcctgcccggAGGAGcctctgtg | atg | ggag   | 7  | hypothetical conserved protein                | SSF56784                                                      |
| CbK_gp212 | - | tgcaagggcctgAGGAGactagg  | gtg | ggag   | 6  | hypothetical conserved protein                |                                                               |
| CbK_gp213 | - | gatcaagtcAGGAGcctgagc    | atg | gagg   | 8  | hypothetical conserved protein                |                                                               |
| CbK_gp214 | - | ggctcccgtacAGGAGcaccct   | atg | aggga  | 6  | hypothetical conserved protein                |                                                               |
| CbK_gp215 | - | cacccggctcgtggcgccctg    | atg | None   | 0  | hypothetical conserved protein                |                                                               |
| CbK_gp216 | - | agcaagaAGGAGGaaagcgcctc  | atg | aggagg | 9  | putative HTH domain DNA-binding protein       | IPR010982, IPR001387, G3DSA:1.10.260.40                       |
| CbK_gp217 | - | aatcgcccAGGcgcgcccctg    | atg | agg    | 10 | hypothetical conserved protein                |                                                               |
| CbK_gp218 | - | acaacgacaagaAGGAGGcccgc  | gtg | aggagg | 4  | hypothetical conserved protein                |                                                               |

|           |   |                         |     |         |    |                                              |                                                             |
|-----------|---|-------------------------|-----|---------|----|----------------------------------------------|-------------------------------------------------------------|
| CbK_gp219 | - | gaggcggggaGGGcaccgtc    | gtg | gggg    | 6  | hypothetical conserved protein               |                                                             |
| CbK_gp220 | - | caactgtccggaAGGTcgagcc  | atg | aggt    | 6  | hypothetical conserved protein               |                                                             |
| CbK_gp221 | - | ggtctatcgccGGAGGgctctg  | atg | ggagg   | 5  | putative Pol I DNA polymerase, palm domain   | IPR001098, IPR002298, SSF56672, G3DSA:3.30.70.370           |
| CbK_gp222 | - | agatcaAAGGtagtgcaagc    | gtg | aggag   | 10 | putative GcrA-like cell cycle regulator      | IPR011681; see text                                         |
| CbK_gp223 | - | gcccacaattcGAGGggaag    | atg | gagg    | 5  | hypothetical conserved protein               |                                                             |
| CbK_gp224 | + | cgacaacgaaAGGAGcctgcc   | atg | aggag   | 6  | hypothetical conserved protein               |                                                             |
| CbK_gp225 | + | cgccgcGAGGctcgcccattg   | atg | gagg    | 11 | hypothetical conserved protein               |                                                             |
| CbK_gp226 | + | caagatcGAGGaaAGGctctg   | atg | gagg    | 4  | hypothetical conserved protein               |                                                             |
| CbK_gp227 | + | cattcgcgtgttGGGGctcg    | atg | gggg    | 5  | hypothetical conserved protein               |                                                             |
| CbK_gp228 | + | caagctcaagaaAGGTcgccct  | atg | aggt    | 5  | hypothetical conserved protein               |                                                             |
| CbK_gp229 | + | cattctcgaactAGGAGGacc   | atg | aggagg  | 4  | hypothetical conserved protein               |                                                             |
| CbK_gp230 | + | tcgatttccctggcggcgccg   | atg | None    | 0  | hypothetical conserved protein               |                                                             |
| CbK_gp231 | + | gtttctggaAGGTcaagactg   | atg | aggt    | 8  | hypothetical conserved protein               |                                                             |
| CbK_gp232 | + | agcgcgagcccgAGGTctgac   | atg | aggt    | 5  | hypothetical conserved protein               |                                                             |
| CbK_gp233 | + | cgacaagcgaAGGAGcctgcc   | ttg | aggag   | 6  | hypothetical conserved protein               |                                                             |
| CbK_gp234 | + | tcggaactcGAGGTCgagcg    | ttg | ggaggt  | 6  | hypothetical conserved protein               |                                                             |
| CbK_gp235 | + | cgccgtggaAGGAGatcgccg   | gtg | aggag   | 8  | hypothetical conserved protein               |                                                             |
| CbK_gp236 | + | cgccgacttcaAGGAcgaagc   | atg | agga    | 6  | hypothetical conserved protein               |                                                             |
| CbK_gp237 | + | accgccGGAGGcgaagccgac   | gtg | ggagg   | 10 | hypothetical conserved protein               |                                                             |
| CbK_gp238 | + | tcaagctGGAGaccgtctgac   | atg | ggag    | 10 | hypothetical conserved protein               |                                                             |
| CbK_gp239 | + | acgacaacgagAGGAGttccc   | atg | aggag   | 5  | hypothetical conserved protein               |                                                             |
| CbK_gp240 | + | caaggaatgGAGGattttcca   | atg | ggag    | 8  | hypothetical conserved protein               |                                                             |
| CbK_gp241 | + | ggcctGGAGatcactcgctag   | atg | ggag    | 12 | hypothetical conserved protein               |                                                             |
| CbK_gp242 | + | aagacctgaAGGAAgactgac   | atg | agga    | 8  | hypothetical conserved protein               |                                                             |
| CbK_gp243 | + | ggccccgAGGAGccccaaagc   | atg | aggag   | 8  | hypothetical conserved protein               |                                                             |
| CbK_gp244 | + | ggtcaagcAGGAGcatgccctc  | gtg | agga    | 9  | hypothetical conserved protein               |                                                             |
| CbK_gp245 | + | gacgacaacAGGAGGctctcg   | atg | aggagg  | 5  | hypothetical conserved protein               |                                                             |
| CbK_gp246 | + | gtcaaaAGGAGGcctgagcc    | ttg | aggagg  | 8  | hypothetical conserved protein               |                                                             |
| CbK_gp247 | + | gggtccctacGAGGccccaca   | atg | gagg    | 7  | hypothetical conserved protein               |                                                             |
| CbK_gp248 | + | ccggcgAGGAGTcccgtgac    | atg | aggaggt | 8  | hypothetical conserved protein               |                                                             |
| CbK_gp249 | + | tggacgacaaAGGAGGgacc    | atg | aggagg  | 4  | hypothetical conserved protein               |                                                             |
| CbK_gp250 | + | ctatgtgaAGGAcctcgctcg   | atg | agga    | 9  | hypothetical conserved protein               |                                                             |
| CbK_gp251 | + | tcaagctGGGGgtgctgctg    | atg | gggg    | 9  | hypothetical conserved protein               |                                                             |
| CbK_gp252 | + | gaccacaGGGGgttcccaggg   | atg | gggg    | 10 | hypothetical conserved protein               |                                                             |
| CbK_gp253 | + | cctcgacgcAGGAAaagctg    | atg | agga    | 7  | hypothetical conserved protein               |                                                             |
| CbK_gp254 | + | cctgaAGGAggagcgaaccga   | atg | agga    | 12 | hypothetical conserved protein               |                                                             |
| CbK_gp255 | + | ttgtcttgagaAGGccccgac   | atg | agg     | 7  | DUF1937 protein                              | IPR015235, SSF52309                                         |
| CbK_gp256 | + | gagcaaacgAGGAGttgaagc   | gtg | ggag    | 8  | hypothetical conserved protein               |                                                             |
| CbK_gp257 | + | ggtgtcccaAGGTaccagcgc   | atg | gaggt   | 7  | hypothetical conserved protein               |                                                             |
| CbK_gp258 | + | ccgggcctatGGAGagagcc    | atg | ggag    | 6  | putative TAT signal protein                  | IPR006311;PRED-TAT                                          |
| CbK_gp259 | + | tctcgaatagcgaaaaagcgc   | atg | None    | 0  | hypothetical conserved protein               |                                                             |
| CbK_gp260 | + | acgtcaacaAGGAGccccaccg  | atg | aggag   | 7  | hypothetical conserved protein               |                                                             |
| CbK_gp261 | + | agaagcccgcggcgagctg     | atg | None    | 0  | hypothetical conserved protein               |                                                             |
| CbK_gp262 | + | gcggtcgaaatcctGGAgacc   | ctg | gga     | 4  | hypothetical conserved protein               |                                                             |
| CbK_gp263 | + | gccgctcgaagcgggtGGaacgg | atg | gga     | 4  | hypothetical conserved protein               |                                                             |
| CbK_gp264 | + | cgagaaAGGAGGcgcctgctg   | atg | aggag   | 8  | putative Ser/Thr protein phosphatase         | IPR004843, IPR006186, SSF56300, PTHR11668, G3DSA:3.60.21.10 |
| CbK_gp265 | + | gttgaatccgcgAGGAGcagcgc | atg | agga    | 6  | hypothetical conserved protein               |                                                             |
| CbK_gp266 | + | gacgacaacAGGAGGccccac   | atg | aggagg  | 5  | hypothetical conserved protein               |                                                             |
| CbK_gp267 | + | catgacaaAGGAGcctctctg   | atg | gag     | 9  | hypothetical conserved protein               |                                                             |
| CbK_gp268 | + | gatcactcctgGAGAGcccgcc  | atg | ggag    | 7  | putative TrmB-like transcriptional regulator | IPR002831                                                   |
| CbK_gp269 | + | ccgtttcAGGAGGctcgccc    | atg | aggagg  | 7  | hypothetical conserved protein               |                                                             |
| CbK_gp270 | + | cgcaagAGGAGcccccgagcc   | gtg | aggag   | 10 | hypothetical conserved protein               |                                                             |
| CbK_gp271 | + | gccacggaagAGGAGcgcctag  | atg | agga    | 7  | hypothetical conserved protein               |                                                             |
| CbK_gp272 | + | acgagcagcAGGAGGgctgac   | atg | ggagg   | 6  | hypothetical conserved protein               |                                                             |
| CbK_gp273 | + | gagacaAGGgaccttaagtcc   | atg | agg     | 11 | hypothetical conserved protein               |                                                             |
| CbK_gp274 | + | aacggaAGGAGcctgaaagacc  | atg | agga    | 11 | hypothetical conserved protein               |                                                             |
| CbK_gp275 | + | caacgccAGGAGcccccttttc  | atg | ggagg   | 9  | hypothetical conserved protein               |                                                             |
| CbK_gp276 | + | atactacgccaaAGGAGcgcgc  | atg | agg     | 4  | hypothetical conserved protein               |                                                             |
| CbK_gp277 | + | caactcgaAGGAGTtcggcga   | atg | gag     | 8  | hypothetical conserved protein               |                                                             |
| CbK_gp278 | + | ccagatcaAGGAGGccccagac  | ttg | aggagg  | 7  | hypothetical conserved protein               |                                                             |
| CbK_gp279 | + | aatcagcaataGGGAGaccagc  | atg | gggg    | 6  | hypothetical conserved protein               |                                                             |
| CbK_gp280 | + | ctgggtccaGGGAGccggcgc   | gtg | gggg    | 8  | hypothetical conserved protein               |                                                             |
| CbK_gp281 | + | cgacaatagAGGAGcaaccccg  | atg | aggag   | 7  | hypothetical conserved protein               |                                                             |
| CbK_gp282 | + | acgccgctgAGGAGGccccgc   | atg | aggagg  | 5  | hypothetical conserved protein               |                                                             |
| CbK_gp283 | + | gcttgagaAGGcgttcgggcca  | atg | agg     | 10 | hypothetical conserved protein               |                                                             |
| CbK_gp284 | + | ccaagcctcGGGctcttcca    | atg | gggg    | 8  | hypothetical conserved protein               |                                                             |
| CbK_gp285 | + | caccgactactAGGAGGtccc   | atg | aggagg  | 4  | hypothetical conserved protein               |                                                             |
| CbK_gp286 | + | ccgctaggacaAGGAGGtccc   | atg | aggagg  | 4  | hypothetical conserved protein               |                                                             |
| CbK_gp287 | + | acgacaacAGGAGGccccgcc   | ttg | aggagg  | 7  | hypothetical conserved protein               |                                                             |
| CbK_gp288 | + | acgagcgtcatgAGGAttcgaa  | atg | agga    | 6  | hypothetical conserved protein               |                                                             |
| CbK_gp289 | + | ccggcgcctcagcgggtcgctc  | atg | None    | 0  | hypothetical conserved protein               |                                                             |
| CbK_gp290 | + | gacgacaacAGGAGGcctcc    | atg | aggagg  | 5  | hypothetical conserved protein               |                                                             |
| CbK_gp291 | + | ggactacatcAGGAGTgagcct  | gtg | gaggt   | 6  | hypothetical conserved protein               |                                                             |
| CbK_gp292 | + | gcttggccgAGGAGTgagcc    | ttg | ggaggt  | 6  | hypothetical conserved protein               |                                                             |

|           |   |                         |     |        |    |                                     |                                                                                                               |
|-----------|---|-------------------------|-----|--------|----|-------------------------------------|---------------------------------------------------------------------------------------------------------------|
| CbK_gp293 | + | ggcagaaGAGGTcatggcctg   | atg | gaggt  | 9  | hypothetical conserved protein      |                                                                                                               |
| CbK_gp294 | + | tctggaacAGGAGaccocgc    | tgt | aggag  | 8  | hypothetical conserved protein      |                                                                                                               |
| CbK_gp295 | + | cggcgggatcaAGGTgagcgc   | atg | aggt   | 6  | hypothetical conserved protein      |                                                                                                               |
| CbK_gp296 | + | tttcatcgccGAGGTcctgtc   | atg | gaggt  | 6  | hypothetical conserved protein      |                                                                                                               |
| CbK_gp297 | + | acgctgcgaAGGAGcctcgac   | atg | aggag  | 7  | hypothetical conserved protein      |                                                                                                               |
| CbK_gp298 | + | ccaagatcAGGAGGgccccgc   | atg | aggagg | 8  | hypothetical conserved protein      |                                                                                                               |
| CbK_gp299 | + | tgcgcacacggcaAGGTAcgc   | atg | aggt   | 4  | hypothetical conserved protein      |                                                                                                               |
| CbK_gp300 | + | cggcctgcatgAGGgggtg     | atg | gagg   | 5  | hypothetical conserved protein      |                                                                                                               |
| CbK_gp301 | + | gatctacaagccggtgcgctg   | atg | None   | 0  | hypothetical conserved protein      |                                                                                                               |
| CbK_gp302 | + | gctcgccaAGGAcgtggtgtg   | atg | agga   | 9  | hypothetical conserved protein      |                                                                                                               |
| CbK_gp303 | + | ccgcctGGAGcttgcgcacc    | atg | ggag   | 11 | hypothetical conserved protein      |                                                                                                               |
| CbK_gp304 | + | cctcggctGGaagtctctcgtc  | atg | gga    | 10 | hypothetical conserved protein      |                                                                                                               |
| CbK_gp305 | + | cctggagatcGGGGtcgggc    | gtg | gggg   | 6  | putative HNH homing endonuclease    | IPR002711                                                                                                     |
| CbK_gp306 | + | cgggctagaccGGAGccaatg   | atg | ggagg  | 5  | hypothetical conserved protein      |                                                                                                               |
| CbK_gp307 | + | gatccttccGGAGGaccgcgc   | gtg | ggagg  | 7  | hypothetical conserved protein      |                                                                                                               |
| CbK_gp308 | + | caggctgaaGAGaccggcgc    | atg | gag    | 9  | hypothetical conserved protein      |                                                                                                               |
| CbK_gp309 | + | caacctcaacaAGGAGccct    | gtg | aggag  | 5  | hypothetical conserved protein      |                                                                                                               |
| CbK_gp310 | + | ccggtcctgaAGGcccccaag   | atg | gagg   | 7  | hypothetical conserved protein      |                                                                                                               |
| CbK_gp311 | + | taagaaatgAGGAaatacatcc  | atg | agga   | 9  | hypothetical conserved protein      |                                                                                                               |
| CbK_gp312 | + | aaggccccctcgGAGccgcc    | atg | ggag   | 6  | hypothetical conserved protein      |                                                                                                               |
| CbK_gp313 | + | gccatgcctGAGacccttcc    | atg | gag    | 8  | hypothetical conserved protein      |                                                                                                               |
| CbK_gp314 | + | cgccgacGGGGtggacctgac   | gtg | gggg   | 10 | putative RNaseH-like domain protein | IPR012337                                                                                                     |
| CbK_gp315 | + | cgaccggcGGAGtttccggc    | tgt | ggag   | 8  | hypothetical conserved protein      |                                                                                                               |
| CbK_gp316 | + | aagacgaccGAGGaccGAGGacg | atg | gagg   | 3  | hypothetical conserved protein      |                                                                                                               |
| CbK_gp317 | + | aacgcaccGAGctttaagacc   | atg | gag    | 10 | Terminase small subunit             | HHpred vs pdb70_18Aug12, hit 3zqp_A, prob 91.6% E=0.1; position relative to terminase large subunit, see text |
| CbK_gp318 | + | tcgcgctgacctagaacgcc    | gtg | None   | 0  | Terminase large subunit             | IPR004921, IPR007868, IPR006141, IPR003587, IPR006517, SSF51294, G3DSA:2.170.16.10                            |

Table S2. Predicted proteins, gene starts and annotations of *C. crescentus* phage CcrKarma. Upstream sequence is the 25 bp of DNA sequence upstream of the start codon, with the predicted Shine-Dalgarno motif capitalized. S-D is the Shine-Dalgarno motif associated with the gene start, and spacing is the interval (in bp) between the S-D and start codon. Evidence includes detected conserved domains or motifs, BlastP and HHPred hits, and experimental or other evidence as detailed in the text.

| Protein name   | Strand | Upstream Sequence      | Start Codon | S-D     | spacing | Predicted product                                 | Evidence                                                                                 |
|----------------|--------|------------------------|-------------|---------|---------|---------------------------------------------------|------------------------------------------------------------------------------------------|
| CcrKarma_gp001 | +      | tggcaaatcaAGGAGccggcg  | atg         | aggag   | 6       | hypothetical conserved protein                    |                                                                                          |
| CcrKarma_gp002 | +      | cgaattcaaaAGGcttactcgg | atg         | agg     | 9       | hypothetical conserved protein                    |                                                                                          |
| CcrKarma_gp003 | +      | caagcccttgtGAGGcctcgg  | atg         | gagg    | 6       | hypothetical conserved protein                    |                                                                                          |
| CcrKarma_gp004 | +      | ccgggcaAGGAGcttcccgcc  | atg         | aggag   | 9       | hypothetical conserved protein                    |                                                                                          |
| CcrKarma_gp005 | +      | gcgccttcGGAGaaaccgccc  | atg         | ggag    | 9       | hypothetical conserved protein                    |                                                                                          |
| CcrKarma_gp006 | +      | cttcaatgacggcgcgcgctc  | gtg         | None    | 0       | hypothetical conserved protein                    |                                                                                          |
| CcrKarma_gp007 | +      | ggccttcaAGGAGtccgccc   | gtg         | aggag   | 8       | hypothetical conserved protein                    |                                                                                          |
| CcrKarma_gp008 | +      | ctttcaAGGAttgctcccgctc | atg         | agga    | 11      | hypothetical conserved protein                    |                                                                                          |
| CcrKarma_gp009 | +      | ggcggcaAGGAtcgagact    | atg         | agga    | 9       | hypothetical conserved protein                    |                                                                                          |
| CcrKarma_gp010 | +      | ccctcgaaAGGAtcgcgacc   | atg         | agga    | 9       | hypothetical conserved protein                    |                                                                                          |
| CcrKarma_gp011 | +      | gacgacggGAGGcgtgagcc   | atg         | ggagg   | 8       | hypothetical conserved protein                    |                                                                                          |
| CcrKarma_gp012 | +      | cgcacttGGAGacagcgccc   | atg         | ggag    | 9       | hypothetical conserved protein                    |                                                                                          |
| CcrKarma_gp013 | +      | ccctcgcaAGGAtcgacccc   | atg         | agga    | 9       | hypothetical conserved protein                    |                                                                                          |
| CcrKarma_gp014 | +      | tcgcttAGGAGGcccgccg    | atg         | aggagg  | 8       | hypothetical conserved protein                    |                                                                                          |
| CcrKarma_gp015 | +      | caaccgaaAGGccgctaaagc  | atg         | agg     | 11      | hypothetical conserved protein                    |                                                                                          |
| CcrKarma_gp016 | +      | cgcaAGGAGGcctaaaagccc  | atg         | aggagg  | 10      | hypothetical conserved protein                    |                                                                                          |
| CcrKarma_gp017 | +      | cgcaacGGGGgtctaacgccc  | gtg         | gggg    | 10      | hypothetical novel protein                        |                                                                                          |
| CcrKarma_gp018 | +      | cttccctcGGAGcttctgctc  | atg         | ggag    | 9       | hypothetical conserved protein                    |                                                                                          |
| CcrKarma_gp019 | +      | ccccttctGGAtcgctcccc   | atg         | gga     | 9       | hypothetical conserved protein                    |                                                                                          |
| CcrKarma_gp020 | +      | ggtcgcaAGGAGacaccggac  | atg         | aggag   | 9       | hypothetical conserved protein                    |                                                                                          |
| CcrKarma_gp021 | +      | cacgcaatcgAGGAGcccgctc | atg         | aggag   | 6       | hypothetical conserved protein                    |                                                                                          |
| CcrKarma_gp022 | +      | tccgAGGAGcgcaagcagctc  | atg         | agga    | 13      | hypothetical conserved protein                    |                                                                                          |
| CcrKarma_gp023 | +      | cgcccttGGAGtcccgagcg   | atg         | ggag    | 10      | hypothetical conserved protein                    |                                                                                          |
| CcrKarma_gp024 | +      | ctacaAGGTggaaccctctg   | atg         | aggt    | 12      | putative lipoprotein                              | LipoP                                                                                    |
| CcrKarma_gp025 | +      | atcctgggctcaAGGTcctg   | ctg         | aggt    | 4       | hypothetical conserved protein                    |                                                                                          |
| CcrKarma_gp026 | +      | tgaattgactgaAGGTtagac  | atg         | aggt    | 4       | hypothetical novel protein                        |                                                                                          |
| CcrKarma_gp027 | +      | catcgcgccctGGAGGgagc   | atg         | ggagg   | 4       | hypothetical conserved protein                    |                                                                                          |
| CcrKarma_gp028 | +      | caccagcaacGAGtccattg   | atg         | gag     | 8       | hypothetical conserved protein                    |                                                                                          |
| CcrKarma_gp029 | +      | catccccacggaAGGTctg    | atg         | ggagg   | 4       | hypothetical conserved protein                    |                                                                                          |
| CcrKarma_gp030 | +      | tggaaatcttcGAGGctacct  | atg         | ggag    | 6       | hypothetical conserved protein                    |                                                                                          |
| CcrKarma_gp031 | +      | ggtcccgctGGAGccgctgccc | gtg         | ggag    | 8       | hypothetical conserved protein                    |                                                                                          |
| CcrKarma_gp032 | +      | ttgcccgaAGGAGGTggtccc  | atg         | aggaggt | 5       | hypothetical conserved protein                    |                                                                                          |
| CcrKarma_gp033 | +      | geccccgaAGGAGcgtgtctt  | ttg         | aggag   | 8       | hypothetical conserved protein                    |                                                                                          |
| CcrKarma_gp034 | +      | agctggcctgaAGGAtgcc    | atg         | agga    | 4       | hypothetical conserved protein                    |                                                                                          |
| CcrKarma_gp035 | +      | tgcgcccgtaacgAGGAcccc  | atg         | agga    | 4       | hypothetical conserved protein                    |                                                                                          |
| CcrKarma_gp036 | +      | cccgtatcaccAGGcctgag   | atg         | ggag    | 6       | hypothetical conserved protein                    |                                                                                          |
| CcrKarma_gp037 | +      | gggcatgaaagAGGgaaacg   | atg         | agg     | 7       | hypothetical conserved protein                    |                                                                                          |
| CcrKarma_gp038 | +      | gcgtGGAcacccggcgggcg   | atg         | gga     | 14      | hypothetical conserved protein                    |                                                                                          |
| CcrKarma_gp039 | +      | gacatcaAGGAGcctctcgcc  | ctg         | agga    | 10      | hypothetical conserved protein                    |                                                                                          |
| CcrKarma_gp040 | +      | cgaaactgtGAGGccattcg   | atg         | ggag    | 8       | hypothetical conserved protein                    |                                                                                          |
| CcrKarma_gp041 | -      | gtactctcaAGGAGtagacc   | gtg         | aggag   | 7       | hypothetical conserved protein                    |                                                                                          |
| CcrKarma_gp042 | -      | gacaactaaGGGGtctgctc   | atg         | gggg    | 8       | putative transglutaminase-like cysteine peptidase | IPR010319                                                                                |
| CcrKarma_gp043 | +      | gcgacctcgaAGGccatctat  | ctg         | agg     | 8       | putative portal protein                           | HHPred vs pdb70_18Aug12, hit Zjes_A, prob 99.9% E=4.8E-23; positional evidence, see text |
| CcrKarma_gp044 | +      | cccgaaccgAGGAcgcccgc   | atg         | agga    | 7       | hypothetical conserved protein                    |                                                                                          |
| CcrKarma_gp045 | +      | aacccctagcttgaAGGtaac  | atg         | gag     | 4       | hypothetical conserved protein                    |                                                                                          |
| CcrKarma_gp046 | +      | ccgtcccaagaAGGcagcctg  | atg         | agg     | 7       | hypothetical conserved protein                    |                                                                                          |
| CcrKarma_gp047 | +      | cctccagccttGAGGcggccc  | gtg         | ggag    | 6       | hypothetical conserved protein                    |                                                                                          |
| CcrKarma_gp048 | +      | gttaaccacGAGGgctttctcc | atg         | ggag    | 8       | hypothetical conserved protein                    |                                                                                          |
| CcrKarma_gp049 | +      | gctcctttcccaAGGgctccc  | atg         | ggag    | 5       | hypothetical conserved protein                    |                                                                                          |
| CcrKarma_gp050 | +      | cgaccgctgcGGGcaccctg   | atg         | gggg    | 6       | hypothetical conserved protein                    |                                                                                          |
| CcrKarma_gp051 | +      | tccaagcttAGGAGcccgtcc  | atg         | aggag   | 7       | hypothetical conserved protein                    |                                                                                          |
| CcrKarma_gp052 | +      | ggcGAGaagcagtggtgagc   | gtg         | gag     | 15      | hypothetical conserved protein                    |                                                                                          |
| CcrKarma_gp053 | +      | gacctctacGAGagcaegcg   | atg         | gag     | 6       | hypothetical conserved protein                    |                                                                                          |
| CcrKarma_gp054 | +      | ggtgaccttccgGAGGagacc  | gtg         | ggagg   | 4       | hypothetical conserved protein                    |                                                                                          |
| CcrKarma_gp055 | +      | tccggtcgAGGAGGgtgacat  | ttg         | aggagg  | 7       | hypothetical conserved protein                    |                                                                                          |
| CcrKarma_gp056 | +      | gctatctcccGAGcccgcgc   | atg         | gga     | 8       | hypothetical conserved protein                    |                                                                                          |
| CcrKarma_gp057 | +      | ttaacctgacgggctcccc    | atg         | None    | 0       | hypothetical conserved protein                    |                                                                                          |
| CcrKarma_gp058 | +      | cctgatgagcGGGtgagcgc   | gtg         | gggg    | 7       | putative HD-domain/PDEase-like protein            | SSF109604                                                                                |
| CcrKarma_gp059 | +      | aacgatcAGGAGaacctccgct | atg         | gag     | 10      | hypothetical conserved protein                    |                                                                                          |
| CcrKarma_gp060 | +      | gctatctGGAtcgtgagcgc   | atg         | gga     | 11      | hypothetical conserved protein                    |                                                                                          |
| CcrKarma_gp061 | +      | cctgcccgaagaAGGcggcctg | atg         | agg     | 7       | putative DHH phosphoesterase protein              | SSF64182                                                                                 |
| CcrKarma_gp062 | +      | caagcgtcgggcGGGcagcgc  | gtg         | gggg    | 5       | hypothetical conserved protein                    |                                                                                          |
| CcrKarma_gp063 | +      | tctgccaaAGGAGatcgccc   | gtg         | aggag   | 7       | hypothetical conserved protein                    |                                                                                          |
| CcrKarma_gp064 | +      | tccagcaacatctAGGAcccc  | atg         | agga    | 4       | hypothetical conserved protein                    |                                                                                          |
| CcrKarma_gp065 | +      | gatctacAGGcctatcaccaac | gtg         | ggag    | 11      | hypothetical conserved protein                    |                                                                                          |
| CcrKarma_gp066 | +      | tctcgtcGAGGcctattctg   | atg         | ggag    | 9       | hypothetical conserved protein                    |                                                                                          |
| CcrKarma_gp067 | +      | cAGGTctgcttcccactaac   | ctg         | aggt    | 16      | putative HNH endonuclease                         | IPR002711                                                                                |
| CcrKarma_gp068 | +      | ccgtgggaAGGagaaactgt   | atg         | gag     | 7       | hypothetical conserved protein                    |                                                                                          |
| CcrKarma_gp069 | +      | aacaccaagAGGAGcaagcca  | atg         | aggag   | 7       | putative major capsid protein                     | experimental evidence, see text                                                          |
| CcrKarma_gp070 | +      | atctaagcAGGAaatccccag  | atg         | agga    | 9       | putative minor capsid protein                     | experimental evidence, see text                                                          |
| CcrKarma_gp071 | +      | ccccaaaAGGAaatcccccc   | atg         | gga     | 9       | hypothetical conserved protein                    |                                                                                          |
| CcrKarma_gp072 | +      | aagcccacggcgccctaaagcc | atg         | None    | 0       | hypothetical conserved protein                    |                                                                                          |
| CcrKarma_gp073 | +      | atcaaccAGGTgaactaaagcc | gtg         | aggt    | 10      | hypothetical conserved protein                    |                                                                                          |
| CcrKarma_gp074 | +      | tGGAcgcaagcgtgccc      | ctg         | gga     | 17      | hypothetical conserved protein                    |                                                                                          |
| CcrKarma_gp075 | +      | ttaacgaaactaagGAGcggcc | atg         | gga     | 5       | hypothetical conserved protein                    |                                                                                          |

|                |   |                         |     |         |    |                                                                   |                                                                                                                                  |
|----------------|---|-------------------------|-----|---------|----|-------------------------------------------------------------------|----------------------------------------------------------------------------------------------------------------------------------|
| CcrKarma_gp076 | + | aacccccAGGAGccctgaacc   | atg | aggag   | 9  | hypothetical conserved protein                                    |                                                                                                                                  |
| CcrKarma_gp077 | + | gcgcgctcaAGGctcttcgog   | ttg | agg     | 9  | putative lectin-like domain protein                               | IPR013320, IPR008985                                                                                                             |
| CcrKarma_gp078 | + | cagacctGGAGGcctaaagacc  | atg | ggaag   | 9  | hypothetical conserved protein                                    |                                                                                                                                  |
| CcrKarma_gp079 | + | ttccgctcgcaAGGccgcgcg   | gtg | gggg    | 6  | hypothetical conserved protein                                    |                                                                                                                                  |
| CcrKarma_gp080 | + | tttGGAGtcttcgagcgccatc  | atg | ggag    | 14 | hypothetical conserved protein                                    |                                                                                                                                  |
| CcrKarma_gp081 | + | cgcaacgcAGGgcttccca     | atg | agg     | 9  | hypothetical conserved protein                                    |                                                                                                                                  |
| CcrKarma_gp082 | + | ctgcggtcgcgAGGctcttc    | atg | gagg    | 5  | hypothetical conserved protein                                    |                                                                                                                                  |
| CcrKarma_gp083 | + | ggcggcgttcAGGagccatc    | atg | gag     | 5  | hypothetical conserved protein                                    |                                                                                                                                  |
| CcrKarma_gp084 | - | atccaagcgcctGGAGactat   | atg | ggag    | 6  | hypothetical conserved protein                                    |                                                                                                                                  |
| CcrKarma_gp085 | + | agtcGGGGaccgagagccgtc   | atg | gggg    | 13 | hypothetical conserved protein                                    |                                                                                                                                  |
| CcrKarma_gp086 | + | tctcgggtGGAGtcttcccta   | atg | ggag    | 9  | hypothetical conserved protein                                    |                                                                                                                                  |
| CcrKarma_gp087 | + | cgcaatccccagagGGAGcgac  | gtg | ggag    | 4  | putative PhoH-like protein                                        | IPR003714, SSF52540, G3DSA:3.40.50.300                                                                                           |
| CcrKarma_gp088 | + | cAGGAcggcaAGGAcgctttt   | ctg | agg     | 7  | hypothetical conserved protein                                    |                                                                                                                                  |
| CcrKarma_gp089 | + | gtcgtgagtgcAGGagcgcg    | gtg | gag     | 4  | hypothetical conserved protein                                    |                                                                                                                                  |
| CcrKarma_gp090 | + | cagcaacgcGGAagaagaccccc | gtg | gga     | 10 | hypothetical conserved protein                                    |                                                                                                                                  |
| CcrKarma_gp091 | + | ctcgtataaaGAGGTgttcg    | atg | gaagt   | 6  | hypothetical conserved protein                                    |                                                                                                                                  |
| CcrKarma_gp092 | + | gtctcggctgggAGGactg     | atg | gagg    | 4  | hypothetical conserved protein                                    |                                                                                                                                  |
| CcrKarma_gp093 | + | ccgtGGAtggtgacctgcc     | atg | gga     | 14 | putative major tail tube protein                                  | experimental evidence, see text                                                                                                  |
| CcrKarma_gp094 | + | cccgaacGGAatccccgaaac   | atg | gga     | 10 | putative pre-tape measure chaperone protein                       | HHpred vs pdb70_18Aug12, hit 2ob9_A, prob 89.3% E=0.82; positional evidence, see text                                            |
| CcrKarma_gp095 | + | cccgaacGGAatccccgaaac   | atg | gga     | 10 | putative pre-tape measure chaperone protein, frameshifted version | positional evidence, see text; slippery sequence AAAAAAC                                                                         |
| CcrKarma_gp096 | + | gcGGGccgcgcgtagatgac    | atg | gggg    | 15 | putative tail tape measure protein                                | IPR007921, IPR013491, IPR013423; experimental evidence, see text                                                                 |
| CcrKarma_gp097 | + | tcctttcaatggttaatgccc   | atg | None    | 0  | hypothetical conserved protein                                    | IPR011740                                                                                                                        |
| CcrKarma_gp098 | + | ctggcaaGAGGccctgaagcc   | gtg | gagg    | 10 | putative tail protein                                             | IPR019228, IPR018964, IPR011928; experimental evidence, see text                                                                 |
| CcrKarma_gp099 | + | gcccacagctccGGAGcagga   | atg | ggag    | 5  | putative NlpC/P60 family cell wall peptidase                      | IPR000064, SSF54001, G3DSA:3.90.1720.10                                                                                          |
| CcrKarma_gp100 | + | ccccggcttgAGGactaatc    | atg | agg     | 6  | putative tail protein                                             | IPR007110; experimental evidence, see text                                                                                       |
| CcrKarma_gp101 | + | tgtcaataaaagctggaagc    | atg | None    | 0  | hypothetical conserved protein                                    |                                                                                                                                  |
| CcrKarma_gp102 | + | ctcgaAGGgctcatcctgca    | atg | agg     | 13 | putative tail protein                                             | IPR000421, IPR008979, G3DSA:2.60.120.260; experimental evidence, see text                                                        |
| CcrKarma_gp103 | + | accctcaagGGAatccgatag   | atg | gga     | 9  | hypothetical conserved protein                                    |                                                                                                                                  |
| CcrKarma_gp104 | + | tctcaatgctcGGAGcctgac   | atg | ggag    | 6  | hypothetical conserved protein                                    |                                                                                                                                  |
| CcrKarma_gp105 | + | tcagcaactccGGAatccac    | atg | agg     | 7  | putative endolysin                                                | IPR002196, SSF53955, G3DSA:1.10.530.40                                                                                           |
| CcrKarma_gp106 | + | gggctcaAGGgctgctgac     | atg | gga     | 10 | putative inner membrane spanin component                          | N-terminal TMD, outer membrane spanin component embedded in +1 frame, see text                                                   |
| CcrKarma_gp107 | + | agtaacaaGAGGTtatccag    | atg | gaagt   | 8  | putative outer membrane spanin component                          | lipoprotein embedded in inner membrane spanin component, see text                                                                |
| CcrKarma_gp108 | + | caagctcaaGGGAagcgcga    | gtg | gggg    | 8  | putative holin protein                                            | predicted 4 TMDs, see text                                                                                                       |
| CcrKarma_gp109 | + | cgctcaacGGAGtagggacc    | atg | ggag    | 8  | hypothetical conserved protein                                    |                                                                                                                                  |
| CcrKarma_gp110 | + | cgacggaacGGGAagcga      | atg | aggag   | 6  | putative HTH domain DNA-binding protein                           | IPR001387, IPR010982, G3DSA:1.10.260.40                                                                                          |
| CcrKarma_gp111 | + | ttaaccaGAGGccccaaaaat   | atg | gagg    | 10 | putative dUTP pyrophosphatase                                     | IPR008181, IPR008180, SSF51283, PTHR11241, G3DSA:2.70.40.10                                                                      |
| CcrKarma_gp112 | + | tcctttccctGAGacccttc    | atg | gag     | 8  | putative ribonucleoside diphosphate reductase beta subunit        | IPR012348, IPR012335, IPR000358, IPR002109, IPR009078, IPR012336, IPR011767                                                      |
| CcrKarma_gp113 | + | tcgacgcGGAaacGAGcccc    | atg | gag     | 5  | putative ribonucleoside diphosphate reductase alpha subunit       | IPR006141, IPR003587, IPR000788, IPR013509, IPR008926, SSF51294, SSF51998, G3DSA:2.170.16.10, G3DSA:3.20.70.20                   |
| CcrKarma_gp114 | - | cggtggtGGGGtggtggcg     | ttg | gggg    | 9  | hypothetical conserved protein                                    |                                                                                                                                  |
| CcrKarma_gp115 | - | tcctcaatgcagcAGGAatccc  | atg | agg     | 5  | hypothetical conserved protein                                    |                                                                                                                                  |
| CcrKarma_gp116 | - | acgacatcaaccGGGccgagc   | atg | ggag    | 6  | hypothetical conserved protein                                    |                                                                                                                                  |
| CcrKarma_gp117 | - | gacgcgcgccAGGActgatcc   | atg | agg     | 7  | putative thymidylate synthase                                     | IPR003669                                                                                                                        |
| CcrKarma_gp118 | - | atccttcgctAGGAaaccccc   | atg | aggag   | 6  | putative dNMP kinase                                              | HHpred vs pdb70_18Aug12, hit 2grj_A, prob 99.9% E=3.6E-27; SSF52540, G3DSA:3.40.50.300                                           |
| CcrKarma_gp119 | - | aaagatacaAGGAcgggcaaccc | ctg | agg     | 10 | putative RecD-like helicase                                       | HHpred vs pdb70_18Aug12, hit 3e1s_A, prob 100% E=1.3E-45; SSF52540, G3DSA:3.40.50.300                                            |
| CcrKarma_gp120 | - | acagaaaaTAGGTatcagcaa   | atg | aggt    | 8  | hypothetical conserved protein                                    |                                                                                                                                  |
| CcrKarma_gp121 | - | agAGaaatgtgacggtgcgcg   | atg | gag     | 17 | hypothetical conserved protein                                    |                                                                                                                                  |
| CcrKarma_gp122 | - | caagatgctGGGAagccgcg    | gtg | ggag    | 8  | hypothetical conserved protein                                    |                                                                                                                                  |
| CcrKarma_gp123 | - | actcccgaaacGAGActgccc   | atg | gag     | 8  | putative exoribonuclease, Pol III-like                            | IPR006055, IPR013520, IPR012337, G3DSA:3.30.420.10                                                                               |
| CcrKarma_gp124 | - | caactggcGGAGacgcaact    | atg | ggag    | 8  | hypothetical conserved protein                                    |                                                                                                                                  |
| CcrKarma_gp125 | - | atcaaatcctcaAGGTgctcc   | atg | aggt    | 5  | putative Pol I DNA polymerase, T7-like                            | IPR001098, IPR012337, SSF56672, PTHR10133, G3DSA:1.10.150.20, G3DSA:1.20.1060.10, G3DSA:3.30.420.10, G3DSA:3.30.70.370; see text |
| CcrKarma_gp126 | - | acatcgttaaccatagagacc   | atg | None    | 0  | putative DNA cytosine methyltransferase                           | IPR001525, IPR018117, SSF53335, PTHR10629-SF11, G3DSA:3.40.50.150, G3DSA:3.90.120.10                                             |
| CcrKarma_gp127 | - | cgaaaaccttcAGGAGtaatc   | atg | aggag   | 5  | hypothetical conserved protein                                    |                                                                                                                                  |
| CcrKarma_gp128 | - | gcgcacaaaccGGAGctctct   | atg | ggag    | 7  | putative TS A1-like protein                                       | blastP to TS A1 [AAU05157], E=4.81E-90, 34.2% Dice identity; HHpred vs pdb70_18Aug12, hit 1g2h_A, prob 94.0% E=0.05              |
| CcrKarma_gp129 | - | tcgggataagccAGGAcceccg  | ctg | agg     | 5  | putative DNA methylase                                            | IPR002052, SSF53335, G3DSA:3.40.50.150                                                                                           |
| CcrKarma_gp130 | - | aggctcgtctcgcGGAGcttg   | ctg | gga     | 4  | hypothetical conserved protein                                    |                                                                                                                                  |
| CcrKarma_gp131 | - | aaagatcgctatcgttgtcgc   | atg | None    | 0  | hypothetical conserved protein                                    |                                                                                                                                  |
| CcrKarma_gp132 | - | catcgcaaaAGGTcatggacac  | gtg | aggt    | 9  | hypothetical conserved protein                                    |                                                                                                                                  |
| CcrKarma_gp133 | - | cgttaaccacgtgcggcgccc   | atg | None    | 0  | putative DNA helicase                                             | IPR014001, IPR001650, IPR000330, IPR014021, SSF52540, PTHR10799, G3DSA:3.40.50.300                                               |
| CcrKarma_gp134 | + | ccggtcacaAGGAgaactatc   | atg | aggag   | 7  | hypothetical conserved protein                                    |                                                                                                                                  |
| CcrKarma_gp135 | - | ggaatacaAGGAagctcgtct   | atg | agg     | 9  | hypothetical conserved protein                                    |                                                                                                                                  |
| CcrKarma_gp136 | - | ccccccgcaaaAGGccccctg   | atg | agg     | 7  | hypothetical conserved protein                                    |                                                                                                                                  |
| CcrKarma_gp137 | - | accacAGGCTctcgcgttac    | ctg | gaagt   | 10 | hypothetical conserved protein                                    |                                                                                                                                  |
| CcrKarma_gp138 | - | cgctttcaAGGActgcccgc    | atg | agg     | 7  | hypothetical conserved protein                                    |                                                                                                                                  |
| CcrKarma_gp139 | - | gcggtctcaAGGAGacgacc    | atg | aggag   | 6  | Putative rib-like protein                                         | PD130832                                                                                                                         |
| CcrKarma_gp140 | - | gcctgcttccGGAGtttggcc   | atg | ggag    | 6  | putative rli-like protein                                         | IPR003594                                                                                                                        |
| CcrKarma_gp141 | + | ggcaaacctccgaaAGGcAGGc  | ttg | agg     | 1  | hypothetical conserved protein                                    |                                                                                                                                  |
| CcrKarma_gp142 | + | gcctGAGGcactcgtctatc    | atg | gagg    | 13 | hypothetical conserved protein                                    |                                                                                                                                  |
| CcrKarma_gp143 | + | cgtatggtacgcgAGGATgac   | atg | agg     | 4  | hypothetical conserved protein                                    |                                                                                                                                  |
| CcrKarma_gp144 | + | caaccgacggcgctcctcca    | ttg | None    | 0  | hypothetical conserved protein                                    |                                                                                                                                  |
| CcrKarma_gp145 | + | acgacaacgaAGGAGTtctc    | atg | aggaggt | 4  | putative tyrosine recombinase                                     | IPR013762, IPR002104, IPR011010                                                                                                  |
| CcrKarma_gp146 | + | gtcctgcgatAGGAGGcgcg    | atg | aggaggt | 5  | hypothetical conserved protein                                    |                                                                                                                                  |
| CcrKarma_gp147 | + | ccgctagtccAGGAGtaagct   | ttg | aggag   | 6  | hypothetical conserved protein                                    |                                                                                                                                  |
| CcrKarma_gp148 | + | accoccgctccgacAGGcttc   | atg | agg     | 4  | hypothetical conserved protein                                    |                                                                                                                                  |
| CcrKarma_gp149 | + | atgctcctGGGccttttga     | gtg | gggg    | 8  | hypothetical conserved protein                                    |                                                                                                                                  |
| CcrKarma_gp150 | + | tccgtacggtaaGGAaaac     | atg | gga     | 4  | hypothetical conserved protein                                    |                                                                                                                                  |
| CcrKarma_gp151 | + | acgattcGGAGtatctcatgaa  | atg | ggag    | 10 | putative HTH domain protein                                       | IPR001387, G3DSA:1.10.260.40                                                                                                     |
| CcrKarma_gp152 | + | ctgtatctcAGGTTcccgc     | atg | gaagt   | 5  | putative tRNA amidotransferase domain protein                     | IPR019004, IPR003789                                                                                                             |
| CcrKarma_gp153 | + | actgatcgaGGGAagttgag    | atg | gggg    | 8  | putative DNA ligase                                               | IPR012340, IPR016027, SSF56091, G3DSA:3.30.470.30                                                                                |
| CcrKarma_gp154 | - | tcgatccGGAGatcttcggcg   | atg | ggag    | 10 | hypothetical conserved protein                                    |                                                                                                                                  |

|                |   |                         |     |         |    |                                               |                                                               |
|----------------|---|-------------------------|-----|---------|----|-----------------------------------------------|---------------------------------------------------------------|
| CcrKarma_gp155 | - | gccaatccccctctatctccgag | gtg | None    | 0  | hypothetical conserved protein                |                                                               |
| CcrKarma_gp156 | - | gtttcAGGgcaaatgtcAGGa   | atg | agg     | 1  | DUF1643 protein                               | IPR012441                                                     |
| CcrKarma_gp157 | - | gcctcgcccttgaaGGAGgca   | atg | agga    | 4  | hypothetical conserved protein                |                                                               |
| CcrKarma_gp158 | - | gAGGccaagaagcgggcaag    | gtg | agg     | 17 | hypothetical conserved protein                |                                                               |
| CcrKarma_gp159 | - | ctGGAtcgccccggcgccctg   | atg | gga     | 16 | hypothetical conserved protein                |                                                               |
| CcrKarma_gp160 | - | gcttttgAGGAGtttggacgt   | atg | aggag   | 9  | hypothetical conserved protein                |                                                               |
| CcrKarma_gp161 | - | agcaggactAGGAGaaagacc   | atg | aggag   | 7  | hypothetical conserved protein                |                                                               |
| CcrKarma_gp162 | - | cgacgccaAGGAgctctgccca  | atg | agga    | 9  | hypothetical conserved protein                |                                                               |
| CcrKarma_gp163 | - | ggcccgctacGGAGtccgctg   | atg | gag     | 8  | putative lipoprotein                          | LipoP                                                         |
| CcrKarma_gp164 | - | cgcttaaaGGGGacctcctc    | atg | gggg    | 8  | putative nicotinate phosphoribosyltransferase | IPR015977, IPR002638, PTHR11098                               |
| CcrKarma_gp165 | - | cagaatgaGGGTaaagcgata   | gtg | gggg    | 9  | putative NUDIX hydrolase domain protein       | IPR014729, IPR000086, IPR015797, SSF52374, PSS1462, PTHR22769 |
| CcrKarma_gp166 | - | caaaagcgtagtgctcgagagg  | atg | None    | 0  | hypothetical conserved protein                |                                                               |
| CcrKarma_gp167 | - | cgcaacgcctgGAActctctg   | atg | gga     | 7  | putative peptidyl-tRNA hydrolase              | IPR002833                                                     |
| CcrKarma_gp168 | - | agcgcgcccggccAGGgctg    | atg | gagg    | 4  | hypothetical conserved protein                |                                                               |
| CcrKarma_gp169 | - | taacctccagcAGGAGaccgc   | atg | aggag   | 5  | hypothetical conserved protein                |                                                               |
| CcrKarma_gp170 | - | acaacgcccGGAGGcccttttc  | atg | ggagg   | 8  | hypothetical conserved protein                |                                                               |
| CcrKarma_gp171 | - | ccccgatctccGAGAagcccc   | atg | gag     | 7  | putative HD-domain/PDEase-like protein        | SSF109604                                                     |
| CcrKarma_gp172 | - | gggagaatctctGAGGgtcgc   | atg | gagg    | 5  | hypothetical conserved protein                |                                                               |
| CcrKarma_gp173 | - | acgcccagaAGGActaatctc   | atg | agga    | 8  | putative DNA-binding domain protein           | IPR016177, SSF54060                                           |
| CcrKarma_gp174 | - | gagccctcGGAGaagtaagcc   | atg | ggag    | 9  | hypothetical conserved protein                |                                                               |
| CcrKarma_gp175 | - | tcttgagaAGGAcaaacctg    | atg | agga    | 9  | hypothetical conserved protein                |                                                               |
| CcrKarma_gp176 | - | tcaacaAGGgcaagaacgcgc   | atg | agg     | 12 | hypothetical conserved protein                |                                                               |
| CcrKarma_gp177 | - | caagcAGGcggcggtctgct    | ttg | agg     | 13 | hypothetical conserved protein                |                                                               |
| CcrKarma_gp178 | - | gctgttcgactGGAGaaatct   | gtg | ggag    | 6  | hypothetical conserved protein                |                                                               |
| CcrKarma_gp179 | - | ctctcggtgaAGGgtcAGGcc   | atg | agg     | 2  | hypothetical conserved protein                |                                                               |
| CcrKarma_gp180 | - | acaaccaagaAGGAGcccgcc   | gtg | aggag   | 6  | putative RtcB-like protein                    | IPR001233                                                     |
| CcrKarma_gp181 | - | gtaccctcaAGGTgatcccc    | atg | aggt    | 7  | hypothetical conserved protein                |                                                               |
| CcrKarma_gp182 | - | aacaagcaAGGAGcaaaccccc  | ttg | aggag   | 7  | putative band 7 lipoprotein                   | IPR001107                                                     |
| CcrKarma_gp183 | - | actcctgaaAGGcgcgcccaca  | atg | agg     | 9  | hypothetical conserved protein                |                                                               |
| CcrKarma_gp184 | - | gccaaccAGGccatggagcgac  | atg | gagg    | 11 | hypothetical conserved protein                |                                                               |
| CcrKarma_gp185 | - | gacgacaaagaAGGAGaccccc  | atg | aggag   | 5  | hypothetical conserved protein                |                                                               |
| CcrKarma_gp186 | - | caagatGGAGGcccgccgcaaa  | atg | ggagg   | 10 | hypothetical conserved protein                |                                                               |
| CcrKarma_gp187 | - | tccagaccagaAGGAGcctgat  | ttg | aggag   | 7  | hypothetical conserved protein                |                                                               |
| CcrKarma_gp188 | - | cgacagcgagAGGAGccgctc   | atg | aggag   | 6  | hypothetical conserved protein                |                                                               |
| CcrKarma_gp189 | - | gcactctggaaaAGGAccacc   | atg | agga    | 5  | hypothetical conserved protein                |                                                               |
| CcrKarma_gp190 | - | ggctcctctcgGAGGacaatcc  | atg | ggag    | 7  | hypothetical conserved protein                |                                                               |
| CcrKarma_gp191 | - | tctgaaAGGctcgacctcctg   | atg | agg     | 12 | hypothetical conserved protein                |                                                               |
| CcrKarma_gp192 | - | cgctccaactcgAGGTctctc   | gtg | aggt    | 4  | hypothetical conserved protein                |                                                               |
| CcrKarma_gp193 | - | cctgagcctGGAGaagcactc   | gtg | ggag    | 8  | hypothetical conserved protein                |                                                               |
| CcrKarma_gp194 | - | actggcgaAGGTgtcggacca   | atg | aggt    | 9  | hypothetical conserved protein                |                                                               |
| CcrKarma_gp195 | - | acaaccccgagAGGAGaccctc  | atg | aggag   | 6  | hypothetical conserved protein                |                                                               |
| CcrKarma_gp196 | - | cgGAGtgcgttccgggtcgag   | atg | gga     | 16 | hypothetical conserved protein                |                                                               |
| CcrKarma_gp197 | - | gcccagaaaAGGcgaAGGcccc  | atg | agg     | 3  | hypothetical conserved protein                |                                                               |
| CcrKarma_gp198 | - | cgccgacAGGAGactctgctg   | gtg | ggag    | 10 | putative winged-helix HTH DNA binding protein | IPR011991                                                     |
| CcrKarma_gp199 | - | gcccagcAGGTccctctggac   | atg | aggt    | 9  | hypothetical novel protein                    |                                                               |
| CcrKarma_gp200 | - | ccaaccgcccggcggaggag    | gtg | None    | 0  | hypothetical conserved protein                |                                                               |
| CcrKarma_gp201 | - | caagcggcAGGgtcccccg     | atg | agg     | 8  | hypothetical conserved protein                |                                                               |
| CcrKarma_gp202 | - | aagaggtcgAGGAGTcgccgc   | atg | aggaggt | 5  | hypothetical conserved protein                |                                                               |
| CcrKarma_gp203 | - | gacgacaaagAGGAGGccctc   | atg | aggagg  | 5  | putative ArdC-like antirestriction protein    | IPR017113, IPR013610                                          |
| CcrKarma_gp204 | - | cgccgcaataatGAGGccctg   | atg | gag     | 6  | hypothetical conserved protein                |                                                               |
| CcrKarma_gp205 | - | ggacctGGAGaacaacccctg   | atg | ggag    | 11 | hypothetical conserved protein                |                                                               |
| CcrKarma_gp206 | - | gggcccggGAGGgctgcatc    | gtg | ggagg   | 9  | hypothetical conserved protein                |                                                               |
| CcrKarma_gp207 | - | cgccctcccaAGGcctcaagt   | atg | gag     | 9  | hypothetical conserved protein                |                                                               |
| CcrKarma_gp208 | - | aacgacaccaggggGAGGagcc  | gtg | ggag    | 4  | putative acyl carrier protein                 | IPR009081, IPR006163, PTHR20863                               |
| CcrKarma_gp209 | - | tcgacaacggcaAGGAcggct   | atg | agga    | 5  | putative HNH endonuclease                     | IPR002711                                                     |
| CcrKarma_gp210 | - | ctcaatcgtaAGGAtcgacc    | atg | agga    | 6  | hypothetical conserved protein                |                                                               |
| CcrKarma_gp211 | - | ccGGAAactccagcGGAgttc   | atg | gga     | 4  | hypothetical conserved protein                |                                                               |
| CcrKarma_gp212 | - | tggGAGaaagctgaagtggag   | atg | ggag    | 14 | hypothetical conserved protein                |                                                               |
| CcrKarma_gp213 | - | cgccctcGAGGTgcaagcctg   | atg | gaggt   | 9  | hypothetical conserved protein                |                                                               |
| CcrKarma_gp214 | - | tccggacctcGAGaaagcccc   | gtg | ggag    | 7  | hypothetical conserved protein                |                                                               |
| CcrKarma_gp215 | - | gcggttcgAGGAGatcgaggc   | ttg | aggag   | 8  | hypothetical conserved protein                |                                                               |
| CcrKarma_gp216 | - | gacgacaaaggaaAGGAccctc  | atg | agga    | 5  | hypothetical conserved protein                |                                                               |
| CcrKarma_gp217 | - | cttcgcaaaGGGaccctgacc   | atg | gggg    | 8  | hypothetical conserved protein                |                                                               |
| CcrKarma_gp218 | - | ccaaGGGgagcggctactaac   | atg | gggg    | 12 | hypothetical conserved protein                |                                                               |
| CcrKarma_gp219 | - | gcgcgaaccgaaAGGTcgactg  | atg | aggt    | 6  | hypothetical conserved protein                |                                                               |
| CcrKarma_gp220 | - | gacgacaaagAGGAGGccctcc  | atg | aggagg  | 5  | hypothetical conserved protein                |                                                               |
| CcrKarma_gp221 | - | ctaactGGAGagccggcgccg   | atg | ggag    | 11 | hypothetical conserved protein                |                                                               |
| CcrKarma_gp222 | - | cgccgaatctccGAGtgacc    | atg | ggag    | 5  | hypothetical conserved protein                | SSF56784                                                      |
| CcrKarma_gp223 | - | ggcctgcccggGAGGccctgtg  | atg | ggag    | 7  | hypothetical conserved protein                |                                                               |
| CcrKarma_gp224 | - | gagactagggtGGGGatgca    | ttg | gggg    | 6  | hypothetical conserved protein                |                                                               |
| CcrKarma_gp225 | - | gatcaagtcAGGccctgagc    | atg | gagg    | 8  | hypothetical conserved protein                |                                                               |
| CcrKarma_gp226 | - | ggctccgtacAGGAtcaacct   | atg | agga    | 6  | hypothetical conserved protein                |                                                               |
| CcrKarma_gp227 | - | aaaGGGccgctctatggctcc   | ctg | gggg    | 14 | hypothetical conserved protein                |                                                               |
| CcrKarma_gp228 | - | agcagaAGGAGGaaagccgctc  | atg | aggagg  | 9  | putative HTH domain DNA-binding protein       | IPR010982, IPR001387, G3DSA:1.10.260.40                       |
| CcrKarma_gp229 | - | aatcccccAGGgcccgcctg    | atg | agg     | 10 | hypothetical conserved protein                |                                                               |
| CcrKarma_gp230 | - | acaacgacagaAGGAGGccgc   | gtg | aggagg  | 4  | hypothetical conserved protein                |                                                               |
| CcrKarma_gp231 | - | gagcggggcgaGGGcaacgctc  | gtg | gggg    | 6  | hypothetical conserved protein                |                                                               |
| CcrKarma_gp232 | - | caactgcccgaAGGTcgagcc   | atg | aggt    | 6  | hypothetical conserved protein                |                                                               |
| CcrKarma_gp233 | - | ggtctatcgcccGAGGgctg    | atg | ggagg   | 5  | putative Pol I DNA polymerase                 | IPR01098, IPR002298, SSF56672, G3DSA:3.30.70.370              |

|                |   |                        |     |        |    |                                         |                                                             |
|----------------|---|------------------------|-----|--------|----|-----------------------------------------|-------------------------------------------------------------|
| CcrKarma_gp234 | - | agatcaAGGAGtagtgcaaac  | gtg | aggag  | 10 | putative GcrA-like cell cycle regulator | IPR011681; see text                                         |
| CcrKarma_gp235 | - | gccgccaatctcGAGGggaag  | atg | gagg   | 5  | hypothetical conserved protein          |                                                             |
| CcrKarma_gp236 | + | cgacaacgaaAGGAGcctgcc  | atg | aggag  | 6  | hypothetical conserved protein          |                                                             |
| CcrKarma_gp237 | + | cgccgcGAGGctcgcccaatg  | atg | gagg   | 11 | hypothetical conserved protein          |                                                             |
| CcrKarma_gp238 | + | caagatcGAGGaaAGGtctg   | atg | gagg   | 4  | hypothetical conserved protein          |                                                             |
| CcrKarma_gp239 | + | cattcgctgttGGGctcgg    | atg | gggg   | 5  | hypothetical conserved protein          |                                                             |
| CcrKarma_gp240 | + | caagctcaagaaAGGTcgct   | atg | aggt   | 5  | hypothetical conserved protein          |                                                             |
| CcrKarma_gp241 | + | catcttcgactAGGAGgacc   | atg | aggagg | 4  | hypothetical conserved protein          |                                                             |
| CcrKarma_gp242 | + | tcgattctcggcgggcgcc    | atg | None   | 0  | hypothetical conserved protein          |                                                             |
| CcrKarma_gp243 | + | gtttctggaAGGTcaggactg  | atg | aggt   | 8  | hypothetical conserved protein          |                                                             |
| CcrKarma_gp244 | + | agcgcgagccgcAGGActgac  | atg | agga   | 5  | hypothetical conserved protein          |                                                             |
| CcrKarma_gp245 | + | cgacagcgaaAGGAGcctgcc  | ttg | aggag  | 6  | hypothetical conserved protein          |                                                             |
| CcrKarma_gp246 | + | tcgatgctGGAGGTcgcgcc   | ttg | ggagg  | 6  | hypothetical conserved protein          |                                                             |
| CcrKarma_gp247 | + | cgccgtgAGGAGGatcgcgcc  | gtg | aggag  | 8  | hypothetical conserved protein          |                                                             |
| CcrKarma_gp248 | + | cgacagctcaAGGcgaagcg   | atg | agg    | 7  | hypothetical conserved protein          |                                                             |
| CcrKarma_gp249 | + | gcccgcGGAGGcagaccgac   | gtg | ggagg  | 10 | hypothetical conserved protein          |                                                             |
| CcrKarma_gp250 | + | tcaagctGGAGaccctctgac  | atg | ggag   | 10 | hypothetical conserved protein          |                                                             |
| CcrKarma_gp251 | + | acgacaacgagAGGAGtccc   | atg | aggag  | 5  | hypothetical conserved protein          |                                                             |
| CcrKarma_gp252 | + | caaggatGGAGGatcttcga   | atg | ggag   | 8  | hypothetical conserved protein          |                                                             |
| CcrKarma_gp253 | + | ggcctGGAGatcatcgctag   | atg | ggag   | 12 | hypothetical conserved protein          |                                                             |
| CcrKarma_gp254 | + | acctcggaAGGAGGactaa    | atg | aggagg | 5  | hypothetical conserved protein          |                                                             |
| CcrKarma_gp255 | + | gaccccGGAGtccaagaccga  | atg | ggag   | 11 | hypothetical conserved protein          |                                                             |
| CcrKarma_gp256 | + | caacgccctGGAGccgcca    | atg | ggag   | 7  | hypothetical conserved protein          |                                                             |
| CcrKarma_gp257 | + | ggtcagccAGGAcactcgctc  | gtg | agga   | 9  | hypothetical conserved protein          |                                                             |
| CcrKarma_gp258 | + | gacgacaacAGGAGGcttcg   | atg | aggagg | 5  | hypothetical conserved protein          |                                                             |
| CcrKarma_gp259 | + | gtcaaaAGGAGGcctgagcc   | ttg | aggagg | 8  | hypothetical conserved protein          |                                                             |
| CcrKarma_gp260 | + | ggcgccctacGAGGccccga   | atg | gagg   | 7  | hypothetical conserved protein          |                                                             |
| CcrKarma_gp261 | + | ccgcgcAGGAGGTccgctgac  | atg | aggagg | 8  | hypothetical conserved protein          |                                                             |
| CcrKarma_gp262 | + | tggacgacaacAGGAGGgacc  | atg | aggagg | 4  | hypothetical conserved protein          |                                                             |
| CcrKarma_gp263 | + | ctacgtcaAGGAcctcgctg   | atg | agga   | 9  | hypothetical conserved protein          |                                                             |
| CcrKarma_gp264 | + | tcagcgtGGAGtggttgctg   | atg | ggag   | 9  | hypothetical conserved protein          |                                                             |
| CcrKarma_gp265 | + | gacccaGGGGgtccccaggc   | atg | gggg   | 10 | hypothetical conserved protein          |                                                             |
| CcrKarma_gp266 | + | cctcgacgcgAGGAAAagctg  | atg | agga   | 7  | hypothetical conserved protein          |                                                             |
| CcrKarma_gp267 | + | aggccctgaagGAGGagaccg  | atg | ggag   | 6  | hypothetical conserved protein          |                                                             |
| CcrKarma_gp268 | + | gaccaaGGGGgtcGGGGcaa   | atg | gggg   | 3  | hypothetical conserved protein          |                                                             |
| CcrKarma_gp269 | + | ttgtctTGAAaagccaaagc   | atg | gag    | 11 | DUF1937 protein                         | IPR015235, SSF52309                                         |
| CcrKarma_gp270 | + | gagcaccagGGAGtgaagc    | gtg | ggag   | 8  | hypothetical conserved protein          |                                                             |
| CcrKarma_gp271 | + | ggtgtcccaGAGTaccagcg   | atg | gaagt  | 7  | hypothetical conserved protein          |                                                             |
| CcrKarma_gp272 | + | ccggcgccatGGAGgagagcc  | atg | ggag   | 6  | putative TAT signal protein             | IPR006311; PRED-TAT                                         |
| CcrKarma_gp273 | + | tctcgacatggcgaaaagcgc  | atg | None   | 0  | hypothetical conserved protein          |                                                             |
| CcrKarma_gp274 | + | agctcaacaAGGAGccccacc  | atg | aggag  | 7  | hypothetical conserved protein          |                                                             |
| CcrKarma_gp275 | + | agaagccccggcgccgagtg   | atg | None   | 0  | hypothetical conserved protein          |                                                             |
| CcrKarma_gp276 | + | cggtcgaaatcctGGAGacc   | ctg | gga    | 4  | hypothetical conserved protein          |                                                             |
| CcrKarma_gp277 | + | gcccgtcgagcgggtGGAAcgg | atg | gga    | 4  | hypothetical conserved protein          |                                                             |
| CcrKarma_gp278 | + | cgaggaagAGGAGcgtgctg   | atg | aggag  | 8  | putative Ser/Thr protein phosphatase    | IPR004843, IPR006186, SSF56300, PTHR11668, G3DSA:3.60.21.10 |
| CcrKarma_gp279 | + | gttgatcccgAGGAGcagcgc  | atg | agga   | 6  | hypothetical conserved protein          |                                                             |
| CcrKarma_gp280 | + | gacgacaacAGGAGGgcca    | atg | aggagg | 5  | hypothetical conserved protein          |                                                             |
| CcrKarma_gp281 | + | catgaccaaGAGccgctctg   | atg | gag    | 9  | hypothetical conserved protein          |                                                             |
| CcrKarma_gp282 | + | gatcatctGGAGaccgccc    | atg | ggag   | 7  | hypothetical conserved protein          |                                                             |
| CcrKarma_gp283 | + | ccgcttcgAGGAGGcccccc   | atg | aggagg | 7  | hypothetical conserved protein          |                                                             |
| CcrKarma_gp284 | + | cgacgacaacAGGAGGcccc   | atg | aggagg | 4  | hypothetical conserved protein          |                                                             |
| CcrKarma_gp285 | + | ctcgaaAGGTCgagatcgcc   | ctg | gaagt  | 10 | hypothetical novel protein              |                                                             |
| CcrKarma_gp286 | + | cgctgaccaaAGGcctggtag  | atg | agg    | 8  | hypothetical conserved protein          |                                                             |
| CcrKarma_gp287 | + | acgcgcgacgGGAGGcctaac  | atg | ggaag  | 6  | hypothetical conserved protein          |                                                             |
| CcrKarma_gp288 | + | tccgaaAGGccttaagtac    | atg | gagg   | 10 | hypothetical conserved protein          |                                                             |
| CcrKarma_gp289 | + | aacggaAGGAcctgaaagacc  | atg | agga   | 11 | hypothetical conserved protein          |                                                             |
| CcrKarma_gp290 | + | acaagcccGGAGccccctttc  | atg | ggagg  | 8  | hypothetical conserved protein          |                                                             |
| CcrKarma_gp291 | + | gcctggaAGGcgctgacatc   | ctg | agg    | 11 | hypothetical conserved protein          |                                                             |
| CcrKarma_gp292 | + | acgccaagaAGGccgctgac   | atg | agg    | 9  | hypothetical conserved protein          |                                                             |
| CcrKarma_gp293 | + | caagatcaAGGAGGccccagtc | ttg | aggagg | 7  | hypothetical conserved protein          |                                                             |
| CcrKarma_gp294 | + | aatcagcaataGGGGccagc   | atg | gggg   | 5  | hypothetical conserved protein          |                                                             |
| CcrKarma_gp295 | + | ctgggccGAGGctcgcccg    | atg | gagg   | 10 | hypothetical conserved protein          |                                                             |
| CcrKarma_gp296 | + | cggaatagAGGAGcaaccgc   | atg | aggag  | 7  | hypothetical conserved protein          |                                                             |
| CcrKarma_gp297 | + | tcgcccctAGGAGGaccgcc   | atg | aggagg | 5  | hypothetical conserved protein          |                                                             |
| CcrKarma_gp298 | + | gcttgagaAGGcgttcggcca  | atg | agg    | 10 | hypothetical conserved protein          |                                                             |
| CcrKarma_gp299 | + | ccaagcctcGGGctgttcca   | atg | gggg   | 8  | hypothetical conserved protein          |                                                             |
| CcrKarma_gp300 | + | caaccgactactAGGAGGtccc | atg | aggagg | 4  | hypothetical conserved protein          |                                                             |
| CcrKarma_gp301 | + | ccgctaggaacaAGGAGTccc  | atg | aggagg | 4  | hypothetical conserved protein          |                                                             |
| CcrKarma_gp302 | + | acgacaacAGGAGGccccgc   | ttg | aggagg | 7  | hypothetical conserved protein          |                                                             |
| CcrKarma_gp303 | + | ttgcggtcatGAGGAtcgaa   | atg | agga   | 6  | hypothetical conserved protein          |                                                             |
| CcrKarma_gp304 | + | atcGGGtctgggattctcg    | ctg | gggg   | 14 | hypothetical conserved protein          |                                                             |
| CcrKarma_gp305 | + | gacgacaacAGGAGGcccc    | atg | aggagg | 5  | hypothetical conserved protein          |                                                             |
| CcrKarma_gp306 | + | ggaactacaTGAGGTggccct  | gtg | gagg   | 6  | hypothetical conserved protein          |                                                             |
| CcrKarma_gp307 | + | cottagccgGGAGGcgcagcc  | ttg | ggaag  | 7  | hypothetical conserved protein          |                                                             |
| CcrKarma_gp308 | + | ggcggcagaaGAGGccatggc  | ctg | gagg   | 7  | hypothetical conserved protein          |                                                             |
| CcrKarma_gp309 | + | ggaacAGGAGaccgcccctg   | atg | aggag  | 11 | hypothetical conserved protein          |                                                             |
| CcrKarma_gp310 | + | gatcgcgcgactGGAGaacgc  | atg | ggag   | 5  | hypothetical conserved protein          |                                                             |
| CcrKarma_gp311 | + | cgggcggaTcaAGGTgagcgc  | atg | aggt   | 6  | hypothetical conserved protein          |                                                             |
| CcrKarma_gp312 | + | tttcatcgccGAGGccccctg  | atg | gagg   | 7  | hypothetical conserved protein          |                                                             |

|                |   |                        |     |       |    |                                     |                                                                                                                |
|----------------|---|------------------------|-----|-------|----|-------------------------------------|----------------------------------------------------------------------------------------------------------------|
| CcrKarma_gp313 | + | acgctgcgaAGGAGcctcgac  | ttg | aggag | 7  | hypothetical conserved protein      |                                                                                                                |
| CcrKarma_gp314 | + | ccagatcAGGAaggcccgcc   | atg | agga  | 10 | hypothetical conserved protein      |                                                                                                                |
| CcrKarma_gp315 | + | tcgcgacacggcaAGGTacgc  | atg | aggt  | 4  | hypothetical conserved protein      |                                                                                                                |
| CcrKarma_gp316 | + | cgccctgcatgcGAGGgctg   | atg | gagg  | 5  | hypothetical conserved protein      |                                                                                                                |
| CcrKarma_gp317 | + | gatctacaagccggtgcgctg  | atg | None  | 0  | hypothetical conserved protein      |                                                                                                                |
| CcrKarma_gp318 | + | gctcgcacaAGGAcgtggtg   | atg | agga  | 9  | hypothetical conserved protein      |                                                                                                                |
| CcrKarma_gp319 | + | ccgctcGGAGcttcgcccac   | atg | ggag  | 11 | hypothetical conserved protein      |                                                                                                                |
| CcrKarma_gp320 | + | cctcggctGGAgtcctcgctc  | atg | gga   | 10 | hypothetical conserved protein      |                                                                                                                |
| CcrKarma_gp321 | + | cctggagtatcGGGtctgggc  | gtg | gggg  | 6  | putative HNH homing endonuclease    | IPR002711                                                                                                      |
| CcrKarma_gp322 | + | aaaccggctagaccGGAggcc  | atg | gga   | 4  | hypothetical conserved protein      |                                                                                                                |
| CcrKarma_gp323 | + | gatccttccGGAGGcggcgc   | gtg | ggagg | 7  | hypothetical conserved protein      |                                                                                                                |
| CcrKarma_gp324 | + | cagactgaaGAGGcccgcg    | atg | gagg  | 8  | hypothetical conserved protein      |                                                                                                                |
| CcrKarma_gp325 | + | caccctcaacaAGGAGccctc  | gtg | aggag | 5  | hypothetical conserved protein      |                                                                                                                |
| CcrKarma_gp326 | + | taagaaatgAGGAaatacatcc | atg | agga  | 9  | hypothetical conserved protein      |                                                                                                                |
| CcrKarma_gp327 | + | aaagccctcgGAGccacccc   | atg | ggag  | 6  | hypothetical conserved protein      |                                                                                                                |
| CcrKarma_gp328 | + | ccatcgctGAGaccctcccc   | atg | gag   | 9  | hypothetical conserved protein      |                                                                                                                |
| CcrKarma_gp329 | + | cgccgacGGGtgcacctgac   | gtg | gggg  | 10 | putative RNaseH-like domain protein | IPR012337                                                                                                      |
| CcrKarma_gp330 | + | cgaccggcGGAGtttcgggc   | ttg | ggag  | 8  | hypothetical conserved protein      |                                                                                                                |
| CcrKarma_gp331 | + | acgaagccGAGGacGAGGacg  | atg | gagg  | 3  | hypothetical conserved protein      |                                                                                                                |
| CcrKarma_gp332 | + | aaacgcaccGAGctttagatc  | atg | gag   | 9  | Terminase small subunit             | HHpred vs pdb70_18Aug12, hit 3zqp_A, prob 90.3% E=0.16; position relative to terminase large subunit, see text |
| CcrKarma_gp333 | + | tcgctgtagaccctagaacgcc | gtg | None  | 0  | Terminase large subunit             | IPR004921, IPR007868, IPR006141, IPR003587, IPR006517, SSF51294, G3DSA:2.170.16.10                             |

Table S3. Predicted proteins, gene starts and annotations of *C. crescentus* phage CrMagneto. Upstream sequence is the 25 bp of DNA sequence upstream of the start codon, with the predicted Shine-Dalgarno motif capitalized. S-D is the Shine-Dalgarno motif associated with the gene start, and spacing is the interval (in bp) between the S-D and start codon. Evidence includes detected conserved domains or motifs, BlastP and HHPred hits, and experimental or other evidence as detailed in the text.

| Protein name    | Strand | Upstream Sequence       | Start Codon | S-D    | spacing | Predicted product                                                 | Evidence                                                                                 |
|-----------------|--------|-------------------------|-------------|--------|---------|-------------------------------------------------------------------|------------------------------------------------------------------------------------------|
| CrMagneto_gp001 | +      | agcgcGaaacccctgpgpatic  | atg         | gggt   | 13      | hypothetical conserved protein                                    |                                                                                          |
| CrMagneto_gp002 | +      | cgatttcaaaGGcttactcgcg  | atg         | agg    | 9       | hypothetical conserved protein                                    |                                                                                          |
| CrMagneto_gp003 | +      | ccagccctgtGTAGGctctcgg  | atg         | gagg   | 6       | hypothetical conserved protein                                    |                                                                                          |
| CrMagneto_gp004 | +      | ccggccaAGGAGcttcccgcc   | atg         | aggag  | 9       | hypothetical conserved protein                                    |                                                                                          |
| CrMagneto_gp005 | +      | ggpccctcGGaAaaccgcgc    | atg         | ggag   | 9       | hypothetical conserved protein                                    |                                                                                          |
| CrMagneto_gp006 | +      | cttcaatgacGGccgtgacgg   | gtg         | gggt   | 7       | hypothetical conserved protein                                    |                                                                                          |
| CrMagneto_gp007 | +      | ggcctcaAGGAGctccaaacc   | gtg         | aggag  | 8       | hypothetical conserved protein                                    |                                                                                          |
| CrMagneto_gp008 | +      | ccgctcatgacctctcattcc   | atg         | None   | 0       | hypothetical conserved protein                                    |                                                                                          |
| CrMagneto_gp009 | +      | gcggccaAGGctcgaact      | atg         | agg    | 9       | hypothetical conserved protein                                    |                                                                                          |
| CrMagneto_gp010 | +      | ccctcgaaAGGctcgcgacc    | atg         | agg    | 9       | hypothetical conserved protein                                    |                                                                                          |
| CrMagneto_gp011 | +      | gacacgggGAGGctgagacc    | atg         | ggagg  | 8       | hypothetical conserved protein                                    |                                                                                          |
| CrMagneto_gp012 | +      | gcggccaAGGcttggaccgc    | atg         | agg    | 9       | hypothetical conserved protein                                    |                                                                                          |
| CrMagneto_gp013 | +      | ccctcgcaAGGctcgaacc     | atg         | agg    | 9       | hypothetical conserved protein                                    |                                                                                          |
| CrMagneto_gp014 | +      | tgcctcaAGGAGcccgcccg    | atg         | aggagg | 8       | hypothetical conserved protein                                    |                                                                                          |
| CrMagneto_gp015 | +      | caacggcaAGGctcgcgacc    | atg         | agg    | 11      | hypothetical conserved protein                                    |                                                                                          |
| CrMagneto_gp016 | +      | ccgcaAGGAGGctcaaacg     | atg         | aggagg | 10      | hypothetical conserved protein                                    |                                                                                          |
| CrMagneto_gp017 | +      | cttctctcGGAGcttctgtac   | atg         | ggag   | 9       | hypothetical conserved protein                                    |                                                                                          |
| CrMagneto_gp018 | +      | cccccttctGGAGctctccc    | atg         | gga    | 9       | hypothetical conserved protein                                    |                                                                                          |
| CrMagneto_gp019 | +      | ggtcgcaAGGAGaccaccgac   | atg         | aggag  | 9       | hypothetical conserved protein                                    |                                                                                          |
| CrMagneto_gp020 | +      | caacgcaAGGAGGcccgctc    | atg         | aggag  | 6       | hypothetical conserved protein                                    |                                                                                          |
| CrMagneto_gp021 | +      | agccgctccggctgataacc    | atg         | None   | 0       | hypothetical conserved protein                                    |                                                                                          |
| CrMagneto_gp022 | +      | cgcccttGGAGcttccggacc   | atg         | ggag   | 10      | hypothetical conserved protein                                    |                                                                                          |
| CrMagneto_gp023 | +      | caaaaAGGAGTaccgcgctg    | atg         | gaggt  | 10      | putative lipoprotein                                              | LipoP                                                                                    |
| CrMagneto_gp024 | +      | cgaaaccggcgagcggctgt    | atg         | None   | 0       | hypothetical novel protein                                        |                                                                                          |
| CrMagneto_gp025 | +      | acttcaaccgctAGGctgacc   | atg         | agg    | 6       | hypothetical conserved protein                                    |                                                                                          |
| CrMagneto_gp026 | +      | caaccgcaAGGcttccattg    | atg         | ggg    | 8       | hypothetical conserved protein                                    |                                                                                          |
| CrMagneto_gp027 | +      | catcccctcgggAGGctctg    | atg         | gagg   | 4       | hypothetical conserved protein                                    |                                                                                          |
| CrMagneto_gp028 | +      | ctaacgagcgtGGAGctctcc   | gtg         | ggagg  | 4       | hypothetical conserved protein                                    |                                                                                          |
| CrMagneto_gp029 | +      | ggtcgccggGAGGctctccc    | gtg         | ggag   | 8       | hypothetical conserved protein                                    |                                                                                          |
| CrMagneto_gp030 | +      | tccgggcaAGGAGGctgacc    | atg         | aggagg | 6       | hypothetical conserved protein                                    |                                                                                          |
| CrMagneto_gp031 | +      | ggccgcaAGGAGGctctctt    | ttg         | aggg   | 8       | hypothetical conserved protein                                    |                                                                                          |
| CrMagneto_gp032 | +      | agcgcgcccctgaAGGcaaac   | atg         | agg    | 4       | hypothetical conserved protein                                    |                                                                                          |
| CrMagneto_gp033 | +      | tcccccctaacAGGAGcccc    | atg         | agg    | 4       | hypothetical conserved protein                                    |                                                                                          |
| CrMagneto_gp034 | +      | cccctgatcaacAGGctctgac  | atg         | gagg   | 6       | hypothetical conserved protein                                    |                                                                                          |
| CrMagneto_gp035 | +      | catgaagaAGGcttccagagc   | gtg         | agg    | 10      | hypothetical conserved protein                                    |                                                                                          |
| CrMagneto_gp036 | +      | gggGaaattggpaactctg     | atg         | agg    | 16      | hypothetical conserved protein                                    |                                                                                          |
| CrMagneto_gp037 | +      | cgaaactgtAGGccattctg    | atg         | gagg   | 8       | hypothetical conserved protein                                    |                                                                                          |
| CrMagneto_gp038 | +      | gctacctcaAGGctgacc      | gtg         | aggag  | 7       | hypothetical conserved protein                                    |                                                                                          |
| CrMagneto_gp039 | -      | atggttaatgcaactaaagg    | gtg         | None   | 0       | putative transglutaminase-like cysteine peptidase                 | IPRO10319                                                                                |
| CrMagneto_gp040 | +      | gggaactcgcaAGGctactct   | ctg         | agg    | 8       | putative portal protein                                           | HHPred vs pdb70_18Aug12, hit 2jcs_A, prob 99.9% E=4.5E-23; positional evidence, see text |
| CrMagneto_gp041 | +      | cccgaaccAGGAGcccgccg    | atg         | agg    | 7       | hypothetical conserved protein                                    |                                                                                          |
| CrMagneto_gp042 | +      | aacctagcttgaAGGtaaac    | atg         | gag    | 4       | hypothetical conserved protein                                    |                                                                                          |
| CrMagneto_gp043 | +      | ccgtcccagaAGGctgacctg   | atg         | agg    | 7       | hypothetical conserved protein                                    |                                                                                          |
| CrMagneto_gp044 | +      | cttccagcttGAGGctctctt   | gtg         | gagg   | 6       | hypothetical conserved protein                                    |                                                                                          |
| CrMagneto_gp045 | +      | gttaccaccAGGcttcttccc   | atg         | ggag   | 8       | hypothetical conserved protein                                    |                                                                                          |
| CrMagneto_gp046 | +      | ggctcttcccAGGctctccc    | atg         | ggg    | 5       | hypothetical conserved protein                                    |                                                                                          |
| CrMagneto_gp047 | +      | cgaccgctgGGGccacctg     | atg         | gggg   | 6       | hypothetical conserved protein                                    |                                                                                          |
| CrMagneto_gp048 | +      | ttcgtggtGGAGGctctaca    | atg         | ggagg  | 7       | hypothetical conserved protein                                    |                                                                                          |
| CrMagneto_gp049 | +      | gatcccgcttcggtccaaagc   | gtg         | None   | 0       | hypothetical conserved protein                                    |                                                                                          |
| CrMagneto_gp050 | +      | cccactctcaAGGctcgcgctg  | atg         | ggg    | 6       | hypothetical conserved protein                                    |                                                                                          |
| CrMagneto_gp051 | +      | gtctgtgaaccggcccaacc    | atg         | None   | 0       | hypothetical conserved protein                                    |                                                                                          |
| CrMagneto_gp052 | +      | tccggtgAGGAGGctgaccat   | ttg         | aggagg | 7       | hypothetical conserved protein                                    |                                                                                          |
| CrMagneto_gp053 | +      | gcttatctccGGaccggccg    | atg         | gga    | 8       | hypothetical conserved protein                                    |                                                                                          |
| CrMagneto_gp054 | +      | ttaaccctgaggggtcccgcg   | atg         | None   | 0       | hypothetical conserved protein                                    |                                                                                          |
| CrMagneto_gp055 | +      | cttgatgagcGGGctgagacc   | gtg         | gggg   | 7       | putative Hb-domain/Pf3ase-like protein                            | SSF109604                                                                                |
| CrMagneto_gp056 | +      | aacgatcaAGGactaccgct    | atg         | ggg    | 10      | hypothetical conserved protein                                    |                                                                                          |
| CrMagneto_gp057 | +      | gctatctGGAGcttggagccg   | atg         | gga    | 11      | hypothetical conserved protein                                    |                                                                                          |
| CrMagneto_gp058 | +      | ctgcccgaagaAGGctgacctg  | atg         | agg    | 7       | putative DHH phosphoesterase protein                              | SSF64182                                                                                 |
| CrMagneto_gp059 | +      | caagcggcgggGGGcaaccgc   | gtg         | gggg   | 5       | hypothetical conserved protein                                    |                                                                                          |
| CrMagneto_gp060 | +      | tctggcaaccAGGAGctggccg  | gtg         | aggag  | 7       | hypothetical conserved protein                                    |                                                                                          |
| CrMagneto_gp061 | +      | ttccagaccatLAGGAGcccc   | atg         | agg    | 4       | hypothetical conserved protein                                    |                                                                                          |
| CrMagneto_gp062 | +      | gattaccAGGcttaccaccac   | gtg         | gagg   | 11      | hypothetical conserved protein                                    |                                                                                          |
| CrMagneto_gp063 | +      | ttcgtctGGAGccattctgt    | atg         | gagg   | 9       | hypothetical conserved protein                                    |                                                                                          |
| CrMagneto_gp064 | +      | aagccggcgccaactctcgg    | atg         | None   | 0       | putative HNH endonuclease                                         | IPRO07211                                                                                |
| CrMagneto_gp065 | +      | ccpagggaaccGaaaaactgt   | atg         | ggg    | 7       | hypothetical conserved protein                                    |                                                                                          |
| CrMagneto_gp066 | +      | acccccaggGGAGccgcca     | atg         | aggag  | 7       | putative major capsid protein                                     | experimental evidence, see text                                                          |
| CrMagneto_gp067 | +      | atctaagcAGGaaaccaccag   | atg         | agg    | 9       | putative minor capsid protein                                     | experimental evidence, see text                                                          |
| CrMagneto_gp068 | +      | ccccgaaccGAAaattcccc    | atg         | gga    | 9       | hypothetical conserved protein                                    |                                                                                          |
| CrMagneto_gp069 | +      | aagcccagggcgctcgaacc    | atg         | None   | 0       | hypothetical conserved protein                                    |                                                                                          |
| CrMagneto_gp070 | +      | atcccccAGGctgaccagacc   | gtg         | agg    | 10      | hypothetical conserved protein                                    |                                                                                          |
| CrMagneto_gp071 | +      | caactccgctcagctcgaacc   | atg         | None   | 0       | hypothetical conserved protein                                    |                                                                                          |
| CrMagneto_gp072 | +      | ttccagagctaaGGGcgccgc   | atg         | gggg   | 5       | hypothetical conserved protein                                    |                                                                                          |
| CrMagneto_gp073 | +      | aacccccAGGAGcttccgaacc  | atg         | aggag  | 9       | hypothetical conserved protein                                    |                                                                                          |
| CrMagneto_gp074 | +      | gcggcccaAGGcttctcggc    | ttg         | agg    | 9       | putative lectin-like domain protein                               | IPRO13320, IPRO08985                                                                     |
| CrMagneto_gp075 | +      | ggtgacctGGAGctcgaacc    | atg         | ggagg  | 8       | hypothetical conserved protein                                    |                                                                                          |
| CrMagneto_gp076 | +      | ctgaggctgaagttctaacg    | atg         | None   | 0       | hypothetical conserved protein                                    |                                                                                          |
| CrMagneto_gp077 | +      | tctGGAGtttcgagccctac    | atg         | ggag   | 14      | hypothetical conserved protein                                    |                                                                                          |
| CrMagneto_gp078 | +      | cgaccggcAGGcttccccca    | atg         | agg    | 9       | hypothetical conserved protein                                    |                                                                                          |
| CrMagneto_gp079 | +      | ctggggtggcGAGGctctccc   | atg         | gggg   | 5       | hypothetical conserved protein                                    |                                                                                          |
| CrMagneto_gp080 | +      | gggtccgctctcGAGctcacc   | atg         | ggg    | 5       | hypothetical conserved protein                                    |                                                                                          |
| CrMagneto_gp081 | +      | agcGGGcccgagagccgctc    | atg         | gggg   | 13      | hypothetical conserved protein                                    |                                                                                          |
| CrMagneto_gp082 | +      | tcccgggtGGAGcttctcccta  | atg         | ggag   | 9       | hypothetical conserved protein                                    |                                                                                          |
| CrMagneto_gp083 | +      | cgccatcccagaGGAGccgac   | gtg         | ggag   | 4       | putative PhoH-like protein                                        | IPRO03714, SSF52540, G3DSA:3.40.50.300                                                   |
| CrMagneto_gp084 | +      | gtgacaagaagctgagccacc   | atg         | None   | 0       | hypothetical conserved protein                                    |                                                                                          |
| CrMagneto_gp085 | +      | caagaagatcattctccacta   | atg         | None   | 0       | hypothetical conserved protein                                    |                                                                                          |
| CrMagneto_gp086 | +      | caagcaaggaaagaAGGcccc   | gtg         | agg    | 4       | hypothetical conserved protein                                    |                                                                                          |
| CrMagneto_gp087 | +      | ctcgattaaAGGctgtctgg    | atg         | gaggt  | 6       | hypothetical conserved protein                                    |                                                                                          |
| CrMagneto_gp088 | +      | gttttgggggaAGGactgt     | atg         | gagg   | 4       | hypothetical conserved protein                                    |                                                                                          |
| CrMagneto_gp089 | +      | ccggGGatttggtcactgccc   | atg         | gga    | 14      | putative major tail tube protein                                  | experimental evidence, see text                                                          |
| CrMagneto_gp090 | +      | ccccgatccGGactcccgaacc  | atg         | gga    | 10      | putative pre-tape measure chaperone protein                       | HHPred vs pdb70_18Aug12, hit 2jcs_A, prob 89.3% E=0.82; positional evidence, see text    |
| CrMagneto_gp091 | +      | ccccgatccGGactcccgaacc  | atg         | gga    | 10      | putative pre-tape measure chaperone protein, frameshifted version | positional evidence, see text; slippery sequence AAAAAA                                  |
| CrMagneto_gp092 | +      | ggGGGcccgccgactaggata   | atg         | gggg   | 15      | putative tail tape measure protein                                | IPRO07921, IPRO13491, IPRO13423; experimental evidence, see text                         |
| CrMagneto_gp093 | +      | tcccttcaggttaagtcccg    | atg         | None   | 0       | hypothetical conserved protein                                    | IPRO11740                                                                                |
| CrMagneto_gp094 | +      | aaaaccgctcccgaagaactgt  | atg         | None   | 0       | putative tail protein                                             | IPRO19228, IPRO18964, IPRO11928; experimental evidence, see text                         |
| CrMagneto_gp095 | +      | ggcccaaccgctcccgaagaact | atg         | ggag   | 5       | putative NAC-PRO family cell wall peptidase                       | IPRO00064, SSF54001, G3DSA:3.90.1720.10                                                  |
| CrMagneto_gp096 | +      | ccccggggttGGAGctctaac   | atg         | agg    | 6       | putative tail protein                                             | IPRO07110; experimental evidence, see text                                               |
| CrMagneto_gp097 | +      | tgtcataaaagtctgggaacc   | atg         | None   | 0       | hypothetical conserved protein                                    |                                                                                          |
| CrMagneto_gp098 | +      | ctcAGGgctctctctccgca    | atg         | agg    | 13      | putative tail protein                                             | IPRO00421, IPRO08979, G3DSA:2.60.120.260; experimental evidence, see text                |
| CrMagneto_gp099 | +      | accctcaaggGAActccgatag  | atg         | gga    | 9       | hypothetical conserved protein                                    |                                                                                          |
| CrMagneto_gp100 | +      | tcttcaagctcGGAGctctgac  | atg         | ggag   | 6       | hypothetical conserved protein                                    |                                                                                          |

|                |   |                        |     |         |    |                                                             |                                                                                                                                  |
|----------------|---|------------------------|-----|---------|----|-------------------------------------------------------------|----------------------------------------------------------------------------------------------------------------------------------|
| CrMgneto_gp101 | + | tccgaaccttcCGAattccac  | atg | gga     | 7  | putative endolysin                                          | IPRO02196, SSF53955, G3DSA:1.10.530.40                                                                                           |
| CrMgneto_gp102 | + | ggggttcaAGGgtgctgcat   | atg | agg     | 10 | putative inner membrane spanin component                    | N-terminal TMD, outer membrane spanin component embedded in +1 frame, see text                                                   |
| CrMgneto_gp103 | + | agtaccacaAGGtattccag   | atg | ggggt   | 8  | putative outer membrane spanin component                    | lipoprotein embedded in inner membrane spanin component, see text                                                                |
| CrMgneto_gp104 | + | caagctcaAGGGaagagaca   | atg | gggg    | 8  | putative holin protein                                      | predicted 4 TMDs, see text                                                                                                       |
| CrMgneto_gp105 | + | cgtctaccGGAtaggacc     | atg | ggag    | 8  | hypothetical conserved protein                              |                                                                                                                                  |
| CrMgneto_gp106 | - | cgaagcagcAGGAaaca      | atg | aggag   | 6  | putative HTH domain DNA-binding protein                     | IPRO01387, IPRO10982, G3DSA:1.10.260.40                                                                                          |
| CrMgneto_gp107 | - | ttaaccaAGGccccgaasta   | atg | ggg     | 10 | putative dUTP pyrophosphatase                               | IPRO08181, IPRO08180, SSF51283, PTHR11241, G3DSA:2.70.40.10                                                                      |
| CrMgneto_gp108 | - | tcccttccctGAGacccttcc  | atg | gag     | 8  | putative ribonucleoside diphosphate reductase beta subunit  | IPRO02348, IPRO12335, IPRO00358, IPRO02109, IPRO09078, IPRO12336, IPRO11767                                                      |
| CrMgneto_gp109 | - | tcagcagGAGaaGAGcccc    | atg | gag     | 5  | putative ribonucleoside diphosphate reductase alpha subunit | IPRO06141, IPRO03387, IPRO00786, IPRO13509, IPRO08026, SSF51284, SSF51998, G3DSA:2.170.16.10, G3DSA:3.20.70.20                   |
| CrMgneto_gp110 | - | cggagcttGGGctgtgctg    | ttg | ggga    | 9  | hypothetical conserved protein                              |                                                                                                                                  |
| CrMgneto_gp111 | - | tccctcatgcagcAGAtcc    | atg | agg     | 5  | hypothetical conserved protein                              |                                                                                                                                  |
| CrMgneto_gp112 | - | acgacataccCGAGccagc    | atg | ggag    | 6  | hypothetical conserved protein                              |                                                                                                                                  |
| CrMgneto_gp113 | - | gagcagcagcAGGatgac     | atg | agg     | 7  | putative thymidylate synthase                               | IPRO03669                                                                                                                        |
| CrMgneto_gp114 | - | atcctctcagaAGGaccccc   | atg | aggag   | 6  | putative dNMP kinase                                        | HMpred vs pdb70_18Aug12, hit 2gr_L_A, prob 99.9% E=1.3E-27; SSF52540, G3DSA:3.40.50.300                                          |
| CrMgneto_gp115 | - | cgtctcgtcccaagctcc     | atg | None    | 0  | putative RecD-like helicase                                 | HMpred vs pdb70_18Aug12, hit 3e1s_A, prob 100% E=1.3E-45; SSF52540, G3DSA:3.40.50.300                                            |
| CrMgneto_gp116 | - | acagaaatAGGTatcagaca   | atg | aggt    | 8  | hypothetical conserved protein                              |                                                                                                                                  |
| CrMgneto_gp117 | - | aGGAaagtgaaggtggcg     | atg | gag     | 17 | hypothetical conserved protein                              |                                                                                                                                  |
| CrMgneto_gp118 | - | caagatcgcgAGGagccgc    | gtg | ggag    | 8  | hypothetical conserved protein                              |                                                                                                                                  |
| CrMgneto_gp119 | - | actcccgaaAGGatcgccg    | atg | gag     | 8  | putative exoribonuclease, Pol III-like                      |                                                                                                                                  |
| CrMgneto_gp120 | - | cactcgccGAGcagcactg    | atg | ggag    | 8  | hypothetical conserved protein                              |                                                                                                                                  |
| CrMgneto_gp121 | - | atcaaatcccaAGGTctcc    | atg | aggt    | 5  | putative Pol I DNA polymerase, T7-like                      | IPRO01098, IPRO12337, SSF56672, PTHR10133, G3DSA:1.10.150.20, G3DSA:1.20.1060.10, G3DSA:3.30.420.10, G3DSA:3.30.70.370; see text |
| CrMgneto_gp122 | - | acatccgttaacca tagacc  | atg | None    | 0  | putative DNA cytosine methyltransferase                     | IPRO01525, IPRO18117, SSF53335, PTHR10629-SF11, G3DSA:3.40.50.150, G3DSA:3.90.120.10                                             |
| CrMgneto_gp123 | - | ggcggcctgaaggAGGcccc   | atg | ggag    | 4  | putative TS A1-like protein                                 | blastp to TS A1 [ANLU05157], E=3.51E-89, 34% Dice Identity; HMpred vs pdb70_18Aug12, hit 1g2r_A, prob 94.0% E=0.05               |
| CrMgneto_gp124 | - | ggcgcaaacCGGctctctct   | atg | ggg     | 7  | putative TS A1-like protein                                 |                                                                                                                                  |
| CrMgneto_gp125 | - | gctgtgcgaagaccctccc    | atg | None    | 0  | putative DNA methylase                                      | IPRO02052, SSF53335, G3DSA:3.40.50.150                                                                                           |
| CrMgneto_gp126 | - | cAGGacctgaaggggtgcc    | ctg | agg     | 16 | hypothetical conserved protein                              |                                                                                                                                  |
| CrMgneto_gp127 | - | aaagatcgctatctgtctgc   | atg | None    | 0  | hypothetical conserved protein                              |                                                                                                                                  |
| CrMgneto_gp128 | - | tatcgcaAGGTcatggacc    | gtg | aggt    | 9  | hypothetical conserved protein                              |                                                                                                                                  |
| CrMgneto_gp129 | - | cgttaaccctgagggcccc    | atg | None    | 0  | putative DNA helicase                                       |                                                                                                                                  |
| CrMgneto_gp130 | + | cggctcaAGGAGcaattc     | atg | aggag   | 7  | hypothetical conserved protein                              | IPRO14001, IPRO1650, IPRO00330, IPRO14021, SSF52540, PTHR10799, G3DSA:3.40.50.300                                                |
| CrMgneto_gp131 | - | ggaaatcaAGGAGccggctg   | atg | aggag   | 7  | hypothetical conserved protein                              |                                                                                                                                  |
| CrMgneto_gp132 | - | cccccgctaaAGccccctg    | atg | agg     | 7  | hypothetical conserved protein                              |                                                                                                                                  |
| CrMgneto_gp133 | - | accaccAGGTctcggcttac   | ctg | gggt    | 10 | hypothetical conserved protein                              |                                                                                                                                  |
| CrMgneto_gp134 | - | agcctttcaAGGatcgccg    | atg | agg     | 7  | hypothetical conserved protein                              |                                                                                                                                  |
| CrMgneto_gp135 | - | ggcgtctcaAGGAcagccc    | atg | aggag   | 6  | Putative rfb-like protein                                   | PD130832                                                                                                                         |
| CrMgneto_gp136 | - | gctcctcttCGAGtttgc     | atg | ggag    | 6  | putative rfa-like protein                                   | IPRO03594                                                                                                                        |
| CrMgneto_gp137 | + | ggcaactccgaAGGcAGGc    | ttg | agg     | 1  | hypothetical conserved protein                              |                                                                                                                                  |
| CrMgneto_gp138 | + | gctcAGGcaagctcgtattc   | atg | ggag    | 13 | hypothetical conserved protein                              |                                                                                                                                  |
| CrMgneto_gp139 | + | cgtatgtacagAGGatpac    | atg | agg     | 4  | hypothetical conserved protein                              |                                                                                                                                  |
| CrMgneto_gp140 | + | caccagggcgcttcccca     | ttg | None    | 0  | hypothetical conserved protein                              |                                                                                                                                  |
| CrMgneto_gp141 | + | acgacaagaAGGAGccttc    | atg | aggag   | 5  | putative tyrosine recombinase                               | IPRO13762, IPRO02104, IPRO11010                                                                                                  |
| CrMgneto_gp142 | + | gtcctggatAGGAGggcg     | atg | aggag   | 5  | hypothetical conserved protein                              |                                                                                                                                  |
| CrMgneto_gp143 | + | cgttagctccAGGAGcagct   | ttg | aggag   | 6  | hypothetical conserved protein                              |                                                                                                                                  |
| CrMgneto_gp144 | + | accocctccagAGGcttc     | atg | agg     | 6  | hypothetical conserved protein                              |                                                                                                                                  |
| CrMgneto_gp145 | + | atcgtctcGGccttttga     | gtg | ggga    | 8  | hypothetical conserved protein                              |                                                                                                                                  |
| CrMgneto_gp146 | + | tccgtacggttaagGGAaac   | atg | gga     | 4  | hypothetical conserved protein                              |                                                                                                                                  |
| CrMgneto_gp147 | + | acgattcGGAttcaatgaa    | atg | ggag    | 10 | putative HTH domain protein                                 | IPRO01387, G3DSA:1.10.260.40                                                                                                     |
| CrMgneto_gp148 | + | cctgtatctcAGGctccgc    | atg | gggt    | 5  | putative RNA amidotransferase domain protein                | IPRO03004, IPRO03789                                                                                                             |
| CrMgneto_gp149 | + | actgatcgagGGaagttgag   | atg | ggga    | 8  | putative DNA ligase                                         | IPRO02340, IPRO16027, SSF56091, G3DSA:3.30.470.30                                                                                |
| CrMgneto_gp150 | - | tcgctccAGGAtttccgcg    | atg | ggag    | 10 | hypothetical conserved protein                              |                                                                                                                                  |
| CrMgneto_gp151 | - | gcctccctctctctccag     | gtg | None    | 0  | hypothetical conserved protein                              |                                                                                                                                  |
| CrMgneto_gp152 | - | gtttcAGGcaaatgctAGG    | atg | agg     | 1  | DUF1643 protein                                             | IPRO12441                                                                                                                        |
| CrMgneto_gp153 | - | gctcgcctctgaAGGagca    | atg | agg     | 4  | hypothetical conserved protein                              |                                                                                                                                  |
| CrMgneto_gp154 | - | agGcacaagaagggcgccg    | gtg | agg     | 17 | hypothetical conserved protein                              |                                                                                                                                  |
| CrMgneto_gp155 | - | ctGAttcgccccggcctg     | atg | gga     | 16 | hypothetical conserved protein                              |                                                                                                                                  |
| CrMgneto_gp156 | - | gcttttgAGGctttgagcgt   | atg | aggag   | 9  | hypothetical conserved protein                              |                                                                                                                                  |
| CrMgneto_gp157 | - | agcaggactAGGAGaagacc   | atg | aggag   | 7  | hypothetical conserved protein                              |                                                                                                                                  |
| CrMgneto_gp158 | - | cgaagcaAGGAGctgccca    | atg | agg     | 9  | hypothetical conserved protein                              |                                                                                                                                  |
| CrMgneto_gp159 | - | ggcggctcaAGGatcgccg    | atg | gag     | 7  | putative lipoprotein                                        | LipoP                                                                                                                            |
| CrMgneto_gp160 | - | cgttaaaGGGcagctcctc    | atg | ggga    | 8  | putative nicotianehydroxylase                               | IPRO15977, IPRO02638, PTHR11098                                                                                                  |
| CrMgneto_gp161 | - | cagaatgAGGcttaagcagata | gtg | gggg    | 9  | putative NUDIX5 hydrolase domain protein                    | IPRO14729, IPRO00086, IPRO15797, SSF52374, P551462, PTHR22769                                                                    |
| CrMgneto_gp162 | - | caaagcgtagtgtcggaggg   | atg | None    | 0  | hypothetical conserved protein                              |                                                                                                                                  |
| CrMgneto_gp163 | - | ctctccagaagccgcttttc   | atg | None    | 0  | putative peptidyl-RNA hydrolase                             | IPRO02833, SSF102462, PTHR12649, G3DSA:3.40.1490.10                                                                              |
| CrMgneto_gp164 | - | agcggccagcAGGctcc      | atg | ggag    | 4  | hypothetical conserved protein                              |                                                                                                                                  |
| CrMgneto_gp165 | - | taacctccagAGGAGaccg    | atg | aggag   | 5  | hypothetical conserved protein                              |                                                                                                                                  |
| CrMgneto_gp166 | - | acaacgcccAGGccccctt    | atg | ggag    | 8  | hypothetical conserved protein                              |                                                                                                                                  |
| CrMgneto_gp167 | - | ccccgatcccGAGaagcccc   | atg | gag     | 7  | putative HD-domain/PDEase-like protein                      | SSF109604                                                                                                                        |
| CrMgneto_gp168 | - | ggagaaattcctGAGggctg   | atg | ggag    | 5  | hypothetical conserved protein                              |                                                                                                                                  |
| CrMgneto_gp169 | - | agccccagaAGGctaaacct   | atg | agg     | 8  | putative DNA-binding domain protein                         | IPRO16177, SSF54060                                                                                                              |
| CrMgneto_gp170 | - | gggctcAGGAGaagtaagcc   | atg | ggag    | 9  | hypothetical conserved protein                              |                                                                                                                                  |
| CrMgneto_gp171 | - | tcttgagaAGGAacaacctg   | atg | agg     | 9  | hypothetical conserved protein                              |                                                                                                                                  |
| CrMgneto_gp172 | - | tcacaAGGcaagaagcccg    | atg | agg     | 12 | hypothetical conserved protein                              |                                                                                                                                  |
| CrMgneto_gp173 | - | caagAGGggcggtctgctg    | ttg | agg     | 13 | hypothetical conserved protein                              |                                                                                                                                  |
| CrMgneto_gp174 | - | gctgttctcctGAGaaatc    | gtg | ggag    | 6  | hypothetical conserved protein                              |                                                                                                                                  |
| CrMgneto_gp175 | - | ctctcgtggaAGGctAGGcc   | atg | agg     | 2  | hypothetical conserved protein                              |                                                                                                                                  |
| CrMgneto_gp176 | - | acaacacagaAGGAGccgcg   | gtg | aggag   | 6  | putative Rfb-like protein                                   | IPRO01233                                                                                                                        |
| CrMgneto_gp177 | - | gtaccctcaAGGTgaccccc   | atg | aggt    | 7  | hypothetical conserved protein                              |                                                                                                                                  |
| CrMgneto_gp178 | - | aaacaagaAGGAGcaacccc   | ttg | aggag   | 7  | putative band 7 lipoprotein                                 | IPRO01107                                                                                                                        |
| CrMgneto_gp179 | - | actcctcaaaAGGccgcccc   | atg | agg     | 9  | hypothetical conserved protein                              |                                                                                                                                  |
| CrMgneto_gp180 | - | ggagcggcgtcggcggctg    | atg | None    | 0  | hypothetical conserved protein                              |                                                                                                                                  |
| CrMgneto_gp181 | - | gagcaacaagaAGGAGactcc  | atg | aggag   | 5  | hypothetical conserved protein                              |                                                                                                                                  |
| CrMgneto_gp182 | - | caggatGAGGccgcgccaa    | atg | ggag    | 10 | hypothetical conserved protein                              |                                                                                                                                  |
| CrMgneto_gp183 | - | tccagcaAGGAGcgtctgat   | ttg | aggag   | 7  | hypothetical conserved protein                              |                                                                                                                                  |
| CrMgneto_gp184 | - | cgaagcagaAGGAGcccttc   | atg | aggag   | 6  | hypothetical conserved protein                              |                                                                                                                                  |
| CrMgneto_gp185 | - | gcctctGGAaagGAGccgc    | atg | gga     | 5  | hypothetical conserved protein                              |                                                                                                                                  |
| CrMgneto_gp186 | - | ggtcctctcggGAGacaaccc  | atg | ggag    | 7  | hypothetical conserved protein                              |                                                                                                                                  |
| CrMgneto_gp187 | - | tctgaaAGGctcagctcctg   | atg | agg     | 12 | hypothetical conserved protein                              |                                                                                                                                  |
| CrMgneto_gp188 | - | cgttccacctcgaAGGTctcc  | gtg | aggt    | 4  | hypothetical conserved protein                              |                                                                                                                                  |
| CrMgneto_gp189 | - | ctcggcctctGAGAGaccctc  | gtg | ggag    | 9  | hypothetical conserved protein                              |                                                                                                                                  |
| CrMgneto_gp190 | - | actggcgaAGGTctcggaca   | atg | aggt    | 9  | hypothetical conserved protein                              |                                                                                                                                  |
| CrMgneto_gp191 | - | acaacccagAGGAGaccctc   | gtg | aggag   | 6  | hypothetical conserved protein                              |                                                                                                                                  |
| CrMgneto_gp192 | - | cggGAtcggttcgggctgag   | atg | gga     | 16 | hypothetical conserved protein                              |                                                                                                                                  |
| CrMgneto_gp193 | - | ggccagaaAGGAGAGGcccc   | atg | agg     | 3  | hypothetical conserved protein                              |                                                                                                                                  |
| CrMgneto_gp194 | - | cgaagcagaAGGaaatctctg  | atg | ggag    | 10 | putative winged-helix HTH DNA binding protein               | IPRO11991                                                                                                                        |
| CrMgneto_gp195 | - | ttagcggccatAGGccgag    | atg | gag     | 6  | hypothetical conserved protein                              |                                                                                                                                  |
| CrMgneto_gp196 | - | ccacccggcgtcggcagagag  | gtg | None    | 0  | hypothetical conserved protein                              |                                                                                                                                  |
| CrMgneto_gp197 | - | cagcggggcAGGttccccg    | atg | agg     | 8  | hypothetical conserved protein                              |                                                                                                                                  |
| CrMgneto_gp198 | - | aaagctcgaAGGAGTccgag   | atg | aggaggt | 5  | hypothetical conserved protein                              |                                                                                                                                  |
| CrMgneto_gp199 | - | gacacacagaAGGAGctctg   | atg | aggaggt | 4  | putative ArgC-like aminotransferase protein                 | IPRO17113, IPRO13610                                                                                                             |
| CrMgneto_gp200 | - | cgcggcgtatAGGccctg     | atg | gag     | 6  | hypothetical conserved protein                              |                                                                                                                                  |
| CrMgneto_gp201 | - | ggaactGAGaacaaccgccc   | atg | ggag    | 11 | hypothetical conserved protein                              |                                                                                                                                  |
| CrMgneto_gp202 | - | ggccggGAGGcgtgctatc    | atg | ggag    | 9  | hypothetical conserved protein                              |                                                                                                                                  |
| CrMgneto_gp203 | - | cgcctgcaAGGctcaagctc   | atg | gag     | 9  | hypothetical conserved protein                              |                                                                                                                                  |
| CrMgneto_gp204 | - | aaagcaccagggGAGagcc    | gtg | ggag    | 4  | putative acyl carrier protein                               | IPRO09081, IPRO06163, PTHR20863                                                                                                  |

|                 |   |                        |     |         |    |                                         |                                                             |
|-----------------|---|------------------------|-----|---------|----|-----------------------------------------|-------------------------------------------------------------|
| CcrMgneto_gp205 | - | tgcacaagggcaAGGAcggct  | atg | agg     | 5  | putative HNH endonuclease               | IPR002711                                                   |
| CcrMgneto_gp206 | - | ctcatttcgttaAGGAtcgacc | atg | agg     | 6  | hypothetical conserved protein          |                                                             |
| CcrMgneto_gp207 | - | cgftccctgggctatcaagcgg | atg | None    | 0  | hypothetical conserved protein          |                                                             |
| CcrMgneto_gp208 | - | tgggGAGaagctgaagtgagc  | atg | ggag    | 14 | hypothetical conserved protein          |                                                             |
| CcrMgneto_gp209 | - | cgcttcAGGTcaagcctg     | atg | gaggt   | 9  | hypothetical conserved protein          |                                                             |
| CcrMgneto_gp210 | - | tccggacctcGGAGaaggccc  | gtg | ggag    | 7  | hypothetical conserved protein          |                                                             |
| CcrMgneto_gp211 | - | acggttcgAGGAGatcgaggc  | ttg | aggag   | 8  | hypothetical conserved protein          |                                                             |
| CcrMgneto_gp212 | - | gagcaacaaggAGGaaacct   | atg | agg     | 5  | hypothetical conserved protein          |                                                             |
| CcrMgneto_gp213 | - | ggtaacttcgcaAGGaac     | ctg | agg     | 4  | hypothetical conserved protein          |                                                             |
| CcrMgneto_gp214 | - | ggcgaaaccgAGGTcgactg   | atg | aggt    | 6  | hypothetical conserved protein          |                                                             |
| CcrMgneto_gp215 | - | gagcaacaacaAGGAGcctcc  | atg | aggag   | 5  | hypothetical conserved protein          |                                                             |
| CcrMgneto_gp216 | - | ctaagTGAGagccggggc     | atg | ggag    | 11 | hypothetical conserved protein          |                                                             |
| CcrMgneto_gp217 | - | cgcgcaattccGGAGtgaacc  | atg | ggag    | 5  | hypothetical conserved protein          | SSF56784                                                    |
| CcrMgneto_gp218 | - | gtctctGGAGtccggagctg   | atg | ggag    | 11 | hypothetical conserved protein          |                                                             |
| CcrMgneto_gp219 | - | ggagggctGGGgactgaac    | atg | ggag    | 7  | hypothetical novel protein              |                                                             |
| CcrMgneto_gp220 | - | gatcaagtcAGGcctgagc    | atg | gagg    | 8  | hypothetical conserved protein          |                                                             |
| CcrMgneto_gp221 | - | ggctcccgtaAGGAtcaacct  | atg | agg     | 6  | hypothetical conserved protein          |                                                             |
| CcrMgneto_gp222 | - | caacgggctcgtggggcctg   | atg | None    | 0  | hypothetical conserved protein          |                                                             |
| CcrMgneto_gp223 | - | agcgagAGGAGaagccctc    | atg | aggag   | 9  | putative HTH domain DNA-binding protein | IPR010982, IPR001387, G3DSA.1.10.260.40                     |
| CcrMgneto_gp224 | - | aatcgccAGGgcccgcctg    | atg | agg     | 10 | hypothetical conserved protein          |                                                             |
| CcrMgneto_gp225 | - | acaacgacagaAGGAGccgc   | gtg | aggag   | 4  | hypothetical conserved protein          |                                                             |
| CcrMgneto_gp226 | - | ggccggccggggcggtccgc   | atg | None    | 0  | hypothetical conserved protein          |                                                             |
| CcrMgneto_gp227 | - | cactgcgggaAGGTgagcc    | atg | agg     | 6  | hypothetical conserved protein          |                                                             |
| CcrMgneto_gp228 | - | ggctcttcggcGAGgctctg   | atg | ggag    | 5  | putative Pol I DNA polymerase           | IPR01098, IPR002298, SSF56672, G3DSA.3.30.70.370            |
| CcrMgneto_gp229 | - | agataAGGAGtagtgaagc    | gtg | aggag   | 10 | putative GOR-like cell cycle regulator  | IPR01681; see text                                          |
| CcrMgneto_gp230 | - | ggcgcaaatcAGGggaag     | atg | gagg    | 5  | hypothetical conserved protein          |                                                             |
| CcrMgneto_gp231 | - | cgcaacaagaAGGAGcctgcc  | atg | aggag   | 6  | hypothetical conserved protein          |                                                             |
| CcrMgneto_gp232 | + | cgccgcAGGctcggcccaatg  | atg | gagg    | 11 | hypothetical conserved protein          |                                                             |
| CcrMgneto_gp233 | + | caagctcAGGAGAGctctg    | atg | gagg    | 4  | hypothetical conserved protein          |                                                             |
| CcrMgneto_gp234 | + | caagctcaagaaAGTcgccct  | atg | aggt    | 5  | hypothetical conserved protein          |                                                             |
| CcrMgneto_gp235 | + | catctcgaactAGGAGaccoc  | atg | aggag   | 4  | hypothetical conserved protein          |                                                             |
| CcrMgneto_gp236 | + | tcgatttccctggggggccgc  | atg | None    | 0  | hypothetical conserved protein          |                                                             |
| CcrMgneto_gp237 | + | gttctggaAGTcaggactg    | atg | aggt    | 8  | hypothetical conserved protein          |                                                             |
| CcrMgneto_gp238 | + | agcgagagcggAGGctgagc   | atg | aggt    | 5  | hypothetical conserved protein          |                                                             |
| CcrMgneto_gp239 | + | cgcaagcaAGGAGcctgcc    | ttg | aggag   | 6  | hypothetical conserved protein          |                                                             |
| CcrMgneto_gp240 | + | ccggatgctGGAGTcgagc    | ttg | ggaggt  | 6  | hypothetical conserved protein          |                                                             |
| CcrMgneto_gp241 | + | actcatgacGGGccgtctg    | atg | ggag    | 7  | hypothetical conserved protein          |                                                             |
| CcrMgneto_gp242 | + | cgccgaactcaAGGAcagccg  | atg | agg     | 6  | hypothetical conserved protein          |                                                             |
| CcrMgneto_gp243 | + | ggcgccGGGgagaccgagc    | gtg | ggag    | 10 | hypothetical conserved protein          |                                                             |
| CcrMgneto_gp244 | + | tcagctGGAGcctctgac     | atg | ggag    | 10 | hypothetical conserved protein          |                                                             |
| CcrMgneto_gp245 | + | acgacaagagaAGGAGtccc   | atg | aggag   | 5  | hypothetical conserved protein          |                                                             |
| CcrMgneto_gp246 | + | caaggaaTGAGatttctga    | atg | ggag    | 8  | hypothetical conserved protein          |                                                             |
| CcrMgneto_gp247 | + | ggcctGGAGatcatcgctag   | atg | ggag    | 12 | hypothetical conserved protein          |                                                             |
| CcrMgneto_gp248 | + | accctcgaaAGGAGcctgac   | atg | aggag   | 5  | hypothetical conserved protein          |                                                             |
| CcrMgneto_gp249 | + | gaccccGAGtccaaagccga   | atg | ggag    | 11 | hypothetical conserved protein          |                                                             |
| CcrMgneto_gp250 | + | caacggcctGGAGccgcaaa   | atg | ggag    | 7  | hypothetical conserved protein          |                                                             |
| CcrMgneto_gp251 | + | ggtcagccAGGAcagccctg   | atg | agg     | 9  | hypothetical conserved protein          |                                                             |
| CcrMgneto_gp252 | + | gagcaacaagAGGAGcctctg  | atg | aggag   | 5  | hypothetical conserved protein          |                                                             |
| CcrMgneto_gp253 | + | gtctaaagAGGAGcctgagc   | ttg | aggag   | 7  | hypothetical conserved protein          |                                                             |
| CcrMgneto_gp254 | + | ggcgccctacAGGcccgcga   | atg | gagg    | 7  | hypothetical conserved protein          |                                                             |
| CcrMgneto_gp255 | + | ccggcgAGGAGGTgctgac    | atg | aggaggt | 8  | hypothetical conserved protein          |                                                             |
| CcrMgneto_gp256 | + | tggagcaacaAGGAGgagcc   | atg | aggag   | 4  | hypothetical conserved protein          |                                                             |
| CcrMgneto_gp257 | + | ctacgtgaAGGAcctgctctg  | atg | agg     | 9  | hypothetical conserved protein          |                                                             |
| CcrMgneto_gp258 | + | tcagggGGGgctgctgctg    | atg | ggag    | 5  | hypothetical conserved protein          |                                                             |
| CcrMgneto_gp259 | + | gaccacGGGgtttccgagc    | atg | ggag    | 10 | hypothetical conserved protein          |                                                             |
| CcrMgneto_gp260 | + | ectcgacggAGGaaagctg    | atg | agg     | 7  | hypothetical conserved protein          |                                                             |
| CcrMgneto_gp261 | + | aagccctgaagGGAGagccg   | atg | ggag    | 6  | hypothetical conserved protein          |                                                             |
| CcrMgneto_gp262 | + | gaccaaaGGGgtcggGcaca   | atg | gggg    | 3  | hypothetical conserved protein          | IPR015235, SSF52309                                         |
| CcrMgneto_gp263 | + | tgtctcGGAGagccagcc     | atg | ggag    | 11 | DUF1937 protein                         |                                                             |
| CcrMgneto_gp264 | + | gagaccagGGAGatgagcc    | gtg | ggag    | 8  | hypothetical conserved protein          |                                                             |
| CcrMgneto_gp265 | + | ggttcccaAGGTaccagcc    | atg | gaggt   | 7  | hypothetical conserved protein          |                                                             |
| CcrMgneto_gp266 | + | ccggcgccatGGAGagagcc   | atg | ggag    | 6  | putative TAT signal protein             | IPR006311; PRED-TAT                                         |
| CcrMgneto_gp267 | + | tctcgatagggcagtagccgc  | atg | None    | 0  | hypothetical conserved protein          |                                                             |
| CcrMgneto_gp268 | + | agctcaacaAGGAGcccagc   | atg | aggag   | 7  | hypothetical conserved protein          |                                                             |
| CcrMgneto_gp269 | + | agagcccgggcgccagctg    | atg | None    | 0  | hypothetical conserved protein          |                                                             |
| CcrMgneto_gp270 | + | ccaactcgccgggttctgac   | atg | None    | 0  | hypothetical conserved protein          |                                                             |
| CcrMgneto_gp271 | + | ggcgctcaggggtGGAGcgg   | atg | gga     | 4  | hypothetical conserved protein          |                                                             |
| CcrMgneto_gp272 | + | cgaggaaAGGAGcctgctg    | atg | aggag   | 8  | putative Ser/Thr protein phosphatase    | IPR004843, IPR006186, SSF56300, PTHR11668, G3DSA.3.60.21.10 |
| CcrMgneto_gp273 | + | ggtgatccgggAGGagccg    | atg | agg     | 6  | hypothetical conserved protein          |                                                             |
| CcrMgneto_gp274 | + | gagcaaccyAGGAGcccacc   | atg | aggag   | 5  | hypothetical conserved protein          |                                                             |
| CcrMgneto_gp275 | + | catgaccaAGGcctctctg    | atg | gag     | 9  | hypothetical conserved protein          |                                                             |
| CcrMgneto_gp276 | + | gatcatcctGGAGatgccc    | atg | ggag    | 7  | hypothetical conserved protein          |                                                             |
| CcrMgneto_gp277 | + | ccgcttcgAGGAGcccgcgc   | atg | aggag   | 7  | hypothetical conserved protein          |                                                             |
| CcrMgneto_gp278 | + | agcaacaagAGGAGcccacc   | atg | aggag   | 6  | hypothetical conserved protein          |                                                             |
| CcrMgneto_gp279 | + | cttctgctcgggtgaagcctg  | atg | None    | 0  | hypothetical conserved protein          |                                                             |
| CcrMgneto_gp280 | + | ccacGGAGaagagccctaaag  | atg | gga     | 14 | hypothetical conserved protein          |                                                             |
| CcrMgneto_gp281 | + | cGGAGGgttaactgagctctg  | atg | ggag    | 15 | hypothetical conserved protein          |                                                             |
| CcrMgneto_gp282 | + | tccgaaAGGccttaagctcc   | atg | gggg    | 10 | hypothetical conserved protein          |                                                             |
| CcrMgneto_gp283 | + | caaggaaAGGAcctgaagacc  | atg | agg     | 11 | hypothetical conserved protein          |                                                             |
| CcrMgneto_gp284 | + | acaagccGGAGcctcttcc    | atg | ggag    | 8  | hypothetical conserved protein          |                                                             |
| CcrMgneto_gp285 | + | atactagccaaagAGGcgcg   | atg | agg     | 4  | hypothetical conserved protein          |                                                             |
| CcrMgneto_gp286 | + | caacatcgaaAGTctggcga   | atg | gag     | 8  | hypothetical conserved protein          |                                                             |
| CcrMgneto_gp287 | + | ccagatcaAGGAGcccagctc  | ttg | aggag   | 7  | hypothetical conserved protein          |                                                             |
| CcrMgneto_gp288 | + | caactcgcatAGGcgcgc     | atg | gggg    | 5  | hypothetical conserved protein          |                                                             |
| CcrMgneto_gp289 | + | ctcgccAGGgctcgcgcgc    | atg | ggg     | 10 | hypothetical conserved protein          |                                                             |
| CcrMgneto_gp290 | + | cgagcatagAGGAGcaaccgc  | atg | aggag   | 7  | hypothetical conserved protein          |                                                             |
| CcrMgneto_gp291 | + | tcccgccctAGGAGGcccgc   | atg | aggag   | 5  | hypothetical conserved protein          |                                                             |
| CcrMgneto_gp292 | + | gcttgaagAGGctcggcca    | atg | agg     | 10 | hypothetical conserved protein          |                                                             |
| CcrMgneto_gp293 | + | ccaagcctGGGcctctccg    | atg | gggg    | 8  | hypothetical conserved protein          |                                                             |
| CcrMgneto_gp294 | + | caacgatctAGGAGctccc    | atg | aggag   | 4  | hypothetical conserved protein          |                                                             |
| CcrMgneto_gp295 | + | ccgctaggacaAGGAGctccc  | atg | aggag   | 4  | hypothetical conserved protein          |                                                             |
| CcrMgneto_gp296 | + | agcaacaAGGAGcccgcgc    | ttg | aggag   | 7  | hypothetical conserved protein          |                                                             |
| CcrMgneto_gp297 | + | tggggcatgAGGAttcgaa    | atg | agg     | 6  | hypothetical conserved protein          |                                                             |
| CcrMgneto_gp298 | + | ccggggctgaaggtgctctc   | atg | None    | 0  | hypothetical conserved protein          |                                                             |
| CcrMgneto_gp299 | + | gagcaacaAGGAGcccgc     | atg | aggag   | 5  | hypothetical conserved protein          |                                                             |
| CcrMgneto_gp300 | + | ggatcaatcAGGTgacctc    | gtg | gaggt   | 6  | hypothetical conserved protein          |                                                             |
| CcrMgneto_gp301 | + | ccttagccaaAGGTgagcc    | ttg | gaggt   | 6  | hypothetical conserved protein          |                                                             |
| CcrMgneto_gp302 | + | agcggAGGcccctgagctg    | atg | ggagg   | 10 | hypothetical conserved protein          |                                                             |
| CcrMgneto_gp303 | + | ggaaAGGAGcccgcgcctg    | atg | ggag    | 11 | hypothetical conserved protein          |                                                             |
| CcrMgneto_gp304 | + | gctcggcagctGGAGaacgc   | atg | ggag    | 5  | hypothetical conserved protein          |                                                             |
| CcrMgneto_gp305 | + | cgccgggataAGGTgagcgc   | atg | aggt    | 6  | hypothetical conserved protein          |                                                             |
| CcrMgneto_gp306 | + | tttcatcccAGGcccctgtc   | atg | gagg    | 7  | hypothetical conserved protein          |                                                             |
| CcrMgneto_gp307 | + | agctggcaAGGAGcctcgac   | ttg | aggag   | 7  | hypothetical conserved protein          |                                                             |
| CcrMgneto_gp308 | + | ccagatAGGAGggccgcgc    | atg | agg     | 10 | hypothetical conserved protein          |                                                             |

|                  |   |                       |     |       |    |                                     |
|------------------|---|-----------------------|-----|-------|----|-------------------------------------|
| CcrMagnet0_gp309 | + | tccgacacggcaAGGTaagc  | atg | aggt  | 4  | hypothetical conserved protein      |
| CcrMagnet0_gp310 | + | cgccctgcatgcGAGggctg  | atg | gag   | 5  | hypothetical conserved protein      |
| CcrMagnet0_gp311 | + | gatctacaagccggtgogctg | atg | None  | 0  | hypothetical conserved protein      |
| CcrMagnet0_gp312 | + | gctcgcacaAGkigtgggtg  | atg | agga  | 9  | hypothetical conserved protein      |
| CcrMagnet0_gp313 | + | ccgctGGAGcttgcgcacc   | atg | gga   | 11 | hypothetical conserved protein      |
| CcrMagnet0_gp314 | + | ctcggctGGAagtctcgtc   | atg | gga   | 10 | hypothetical conserved protein      |
| CcrMagnet0_gp315 | + | ctcggagtatcGGGctcggc  | gtg | ggg   | 6  | putative HNH homing endonuclease    |
| CcrMagnet0_gp316 | + | cgggctagaccGAGccatg   | atg | ggag  | 5  | hypothetical conserved protein      |
| CcrMagnet0_gp317 | + | gatccttccGGGagcggc    | gtg | ggag  | 7  | hypothetical conserved protein      |
| CcrMagnet0_gp318 | + | caqgtgaAGAcggggg      | atg | gag   | 9  | hypothetical conserved protein      |
| CcrMagnet0_gp319 | + | caacctcaacaAGAGccct   | gtg | aggag | 5  | hypothetical conserved protein      |
| CcrMagnet0_gp320 | + | tccggcctaaAGAcccccg   | atg | agga  | 6  | hypothetical novel protein          |
| CcrMagnet0_gp321 | + | taagaatgAGAAatcatcc   | atg | agga  | 9  | hypothetical conserved protein      |
| CcrMagnet0_gp322 | + | aagccctcggGAGccacc    | atg | ggag  | 6  | hypothetical conserved protein      |
| CcrMagnet0_gp323 | + | gcctcgcctGAGaccctcc   | atg | gag   | 8  | hypothetical conserved protein      |
| CcrMagnet0_gp324 | + | cgccgacGGGctgacctgac  | gtg | ggg   | 10 | putative RNaseH-like domain protein |
| CcrMagnet0_gp325 | + | cgaccggGGAGcttccggc   | ttg | gag   | 8  | hypothetical conserved protein      |
| CcrMagnet0_gp326 | + | aagaagaccAGaccAGGacg  | atg | gag   | 3  | hypothetical conserved protein      |
| CcrMagnet0_gp327 | + | aaagcaccAGctttagatc   | atg | gag   | 9  | putative terminase small subunit    |
| CcrMagnet0_gp328 | + | tccgctgacctagaagcc    | gtg | None  | 0  | putative terminase large subunit    |

IPR002711

IPR012337

HHpred vs pdb70\_18Aug12, hit 3xnp\_A, prob 90.4%, E=0.15, position relative to terminase large subunit, see text  
IPR004921, IPR007868, IPR006141, IPR003587, IPR006517, SSF51294, G3D5A-2.170.16.10

**Table S4.** Predicted proteins, gene starts and annotations of *C. crescentus* phage CcrSwift. Upstream sequence is the 25 bp of DNA sequence upstream of the start codon, with the predicted Shine-Dalgarno motif capitalized. S-D is the Shine-Dalgarno motif associated with the gene start, and spacing is the interval (in bp) between the S-D and start codon. Evidence includes detected conserved domains or motifs, BlastP and HHpred hits, and experimental or other evidence as detailed in the text.

| Protein name   | Strand | Upstream Sequence       | Start Codon | S-D     | spacing | Predicted product                                 | Evidence                                                                                 |
|----------------|--------|-------------------------|-------------|---------|---------|---------------------------------------------------|------------------------------------------------------------------------------------------|
| CcrSwift_gp001 | +      | tggcgaaatcatGGAGccgacg  | atg         | ggag    | 6       | hypothetical conserved protein                    |                                                                                          |
| CcrSwift_gp002 | +      | cgaatcaaaAGGcttatcgcc   | atg         | agg     | 9       | hypothetical conserved protein                    |                                                                                          |
| CcrSwift_gp003 | +      | atcccgctaccGGaacaacccc  | atg         | gga     | 7       | hypothetical conserved protein                    |                                                                                          |
| CcrSwift_gp004 | -      | cgcgccctGGAGatcgcccc    | atg         | ggag    | 8       | hypothetical conserved protein                    |                                                                                          |
| CcrSwift_gp005 | +      | tttgacattgtGAGGcaatcc   | atg         | gagg    | 6       | hypothetical conserved protein                    |                                                                                          |
| CcrSwift_gp006 | +      | aacccctGGAGGccctgcccc   | atg         | ggagg   | 9       | hypothetical conserved protein                    |                                                                                          |
| CcrSwift_gp007 | +      | cgacgcccgaAGGTgaagge    | gtg         | aggt    | 6       | hypothetical conserved protein                    |                                                                                          |
| CcrSwift_gp008 | +      | gcgttactttttgtaagga     | atg         | None    | 0       | hypothetical conserved protein                    |                                                                                          |
| CcrSwift_gp009 | +      | gccccgctgtcgaagccgccc   | atg         | None    | 0       | hypothetical conserved protein                    |                                                                                          |
| CcrSwift_gp010 | +      | cctcacctGGAGattttcccc   | atg         | ggag    | 9       | hypothetical conserved protein                    |                                                                                          |
| CcrSwift_gp011 | +      | cgcgactGGAAagccaagccc   | atg         | gga     | 11      | hypothetical conserved protein                    |                                                                                          |
| CcrSwift_gp012 | +      | cccccgcaAGGAtcgccccgac  | atg         | agga    | 9       | hypothetical conserved protein                    |                                                                                          |
| CcrSwift_gp013 | +      | gGAGccgcaaccatgccccgc   | atg         | gag     | 17      | hypothetical conserved protein                    |                                                                                          |
| CcrSwift_gp014 | +      | ctgcgcaAGGTcgctaaagcc   | atg         | aggt    | 10      | hypothetical conserved protein                    |                                                                                          |
| CcrSwift_gp015 | +      | caagccaAGGAgcctagacc    | atg         | agga    | 10      | hypothetical conserved protein                    |                                                                                          |
| CcrSwift_gp016 | +      | cttccttcGGAGcttctgacc   | atg         | ggag    | 9       | hypothetical conserved protein                    |                                                                                          |
| CcrSwift_gp017 | +      | cccccttctGGAtcgctcccc   | atg         | gga     | 9       | hypothetical conserved protein                    |                                                                                          |
| CcrSwift_gp018 | +      | ggtcgcaAGGAGacaccgcagc  | atg         | aggag   | 9       | hypothetical conserved protein                    |                                                                                          |
| CcrSwift_gp019 | +      | cacgcaatcgAGGAGcccgctc  | atg         | aggag   | 6       | hypothetical conserved protein                    |                                                                                          |
| CcrSwift_gp020 | +      | tccgAGGAcgcaagcaagcgtc  | atg         | agga    | 13      | hypothetical conserved protein                    |                                                                                          |
| CcrSwift_gp021 | +      | cgcccttGGAGTccccggacg   | atg         | ggag    | 10      | hypothetical conserved protein                    |                                                                                          |
| CcrSwift_gp022 | +      | caacaagAGGTaccocgctg    | atg         | gaggt   | 10      | putative lipoprotein                              | LipoP                                                                                    |
| CcrSwift_gp023 | +      | acttcaaccctAGGcggtatc   | atg         | agg     | 6       | hypothetical conserved protein                    |                                                                                          |
| CcrSwift_gp024 | +      | caccagcaacGAGTccattg    | atg         | gag     | 8       | hypothetical conserved protein                    |                                                                                          |
| CcrSwift_gp025 | +      | catccccatcggaAGGccctg   | atg         | gagg    | 4       | hypothetical conserved protein                    |                                                                                          |
| CcrSwift_gp026 | +      | ctacgagcgcgtGGAGGctccc  | gtg         | ggaag   | 4       | hypothetical conserved protein                    |                                                                                          |
| CcrSwift_gp027 | +      | ggtccccctGGAGccccctgccc | gtg         | ggag    | 8       | hypothetical conserved protein                    |                                                                                          |
| CcrSwift_gp028 | +      | ttgcccggcaAGGAGTggtccc  | atg         | aggaagt | 5       | hypothetical conserved protein                    |                                                                                          |
| CcrSwift_gp029 | +      | gcccccaAGGAGcgtgtctct   | ttg         | aggag   | 8       | hypothetical conserved protein                    |                                                                                          |
| CcrSwift_gp030 | +      | agacgcccctgaAGGAcac     | atg         | agga    | 4       | hypothetical conserved protein                    |                                                                                          |
| CcrSwift_gp031 | +      | tgcgccccgtaacAGGAcccc   | atg         | agga    | 4       | hypothetical conserved protein                    |                                                                                          |
| CcrSwift_gp032 | +      | ccctgatcaccAGGccctgac   | atg         | gagg    | 6       | hypothetical conserved protein                    |                                                                                          |
| CcrSwift_gp033 | +      | ggcgatgaagaAGGcgaaccc   | atg         | agg     | 7       | hypothetical conserved protein                    |                                                                                          |
| CcrSwift_gp034 | +      | cgcgGGAcacccgcgcgcgcc   | atg         | gga     | 14      | hypothetical conserved protein                    |                                                                                          |
| CcrSwift_gp035 | +      | gacatcaAGGAGcccttcgccc  | ctg         | agga    | 10      | hypothetical conserved protein                    |                                                                                          |
| CcrSwift_gp036 | +      | tGAGGTcttgaggaccattg    | atg         | gaggt   | 15      | hypothetical novel protein                        |                                                                                          |
| CcrSwift_gp037 | +      | acctgggggcaAGGAGTgtatg  | atg         | ggaggt  | 5       | hypothetical conserved protein                    |                                                                                          |
| CcrSwift_gp038 | -      | gtactctcaAGGAGtagcgac   | gtg         | aggag   | 7       | hypothetical conserved protein                    |                                                                                          |
| CcrSwift_gp039 | -      | gacacttaaGGGgtgctgac    | atg         | gggg    | 8       | putative transglutaminase-like cysteine peptidase | IPR010319                                                                                |
| CcrSwift_gp040 | +      | ggaacctcgcaAGGccatctat  | ctg         | agg     | 8       | putative portal protein                           | HHpred vs pds70_18Aug12, hit 2jes_A, prob 99.9% E=4.9E-23; positional evidence, see text |
| CcrSwift_gp041 | +      | ccccaaaccgAGGaccgccc    | atg         | agga    | 7       | hypothetical conserved protein                    |                                                                                          |
| CcrSwift_gp042 | +      | aacctagcttgaGAGtaac     | atg         | gag     | 4       | hypothetical conserved protein                    |                                                                                          |
| CcrSwift_gp043 | +      | cggtcccaagaAGGcgacctg   | atg         | agg     | 7       | hypothetical conserved protein                    |                                                                                          |
| CcrSwift_gp044 | +      | cctccagccttGAGGcgccctg  | gtg         | gagg    | 6       | hypothetical conserved protein                    |                                                                                          |
| CcrSwift_gp045 | +      | gttaaccacAGGgcttttccc   | atg         | gagg    | 8       | hypothetical conserved protein                    |                                                                                          |
| CcrSwift_gp046 | +      | ggctccttcccGAGgctctg    | atg         | gagg    | 5       | hypothetical conserved protein                    |                                                                                          |
| CcrSwift_gp047 | +      | cgaccgctgcccGGGccacctg  | atg         | gggg    | 6       | hypothetical conserved protein                    |                                                                                          |
| CcrSwift_gp048 | +      | tccaaagcttAGGAGccccctcc | atg         | aggag   | 7       | hypothetical conserved protein                    |                                                                                          |
| CcrSwift_gp049 | +      | gatcaccgctcggtcaagac    | gtg         | None    | 0       | hypothetical conserved protein                    |                                                                                          |
| CcrSwift_gp050 | +      | gaccatctacGAGgacagctg   | atg         | gag     | 6       | hypothetical conserved protein                    |                                                                                          |
| CcrSwift_gp051 | +      | gccgtgaaaccgcccagcccc   | atg         | None    | 0       | hypothetical conserved protein                    |                                                                                          |
| CcrSwift_gp052 | +      | tccggtcgAGGAGGcgacat    | ttg         | aggagg  | 7       | hypothetical conserved protein                    |                                                                                          |
| CcrSwift_gp053 | +      | gcgcaagccgcccagcgtccc   | gtg         | None    | 0       | hypothetical conserved protein                    |                                                                                          |
| CcrSwift_gp054 | +      | ttaaccatgacggcctccccg   | atg         | None    | 0       | hypothetical conserved protein                    |                                                                                          |
| CcrSwift_gp055 | +      | cctgatgagcGGGtggaagc    | gtg         | gggg    | 7       | putative HD-domain/PDEase-like protein            | SSF109604                                                                                |
| CcrSwift_gp056 | +      | aacgatacGAGaacatccgct   | atg         | gag     | 10      | hypothetical conserved protein                    |                                                                                          |
| CcrSwift_gp057 | +      | gctatctGGAtcgctgagccg   | atg         | gga     | 11      | hypothetical conserved protein                    |                                                                                          |
| CcrSwift_gp058 | +      | cctgcggaagaAGGcgccctg   | atg         | agg     | 7       | putative DHH phosphoesterase protein              | SSF64182                                                                                 |
| CcrSwift_gp059 | +      | caagcgtcgggcGGGgacgccc  | gtg         | gggg    | 5       | hypothetical conserved protein                    |                                                                                          |
| CcrSwift_gp060 | +      | tctgtcagcAGGAGatcgccc   | gtg         | aggag   | 7       | hypothetical conserved protein                    |                                                                                          |
| CcrSwift_gp061 | +      | tccagcaatctAGGAccccc    | atg         | agga    | 4       | hypothetical conserved protein                    |                                                                                          |
| CcrSwift_gp062 | +      | gattaacGAGccctatccacc   | gtg         | gagg    | 11      | hypothetical conserved protein                    |                                                                                          |
| CcrSwift_gp063 | +      | ttcctgctcGAGGccatttctg  | atg         | gagg    | 9       | hypothetical conserved protein                    |                                                                                          |
| CcrSwift_gp064 | +      | aaqccgycgcaacttcccg     | atg         | None    | 0       | putative HNH endonuclease                         | IPR002711                                                                                |
| CcrSwift_gp065 | +      | ccgtgggaaGAGagaactgt    | atg         | gag     | 7       | hypothetical conserved protein                    |                                                                                          |
| CcrSwift_gp066 | +      | acaccaaagAGGAGcaagcca   | atg         | aggag   | 7       | putative major capsid protein                     | experimental evidence, see text                                                          |
| CcrSwift_gp067 | +      | atcctaagcAGGAaattccccg  | atg         | agga    | 9       | putative minor capsid protein                     | experimental evidence, see text                                                          |
| CcrSwift_gp068 | +      | ccccgaaacGGAAaattcccc   | atg         | gga     | 9       | hypothetical conserved protein                    |                                                                                          |
| CcrSwift_gp069 | +      | aaqcccaagcggcctaaagcc   | atg         | None    | 0       | hypothetical conserved protein                    |                                                                                          |
| CcrSwift_gp070 | +      | atcaccAGGTgaactaaagcc   | gtg         | aggt    | 10      | hypothetical conserved protein                    |                                                                                          |

|                |   |                        |     |        |    |                                                                   |                                                                                                                                  |
|----------------|---|------------------------|-----|--------|----|-------------------------------------------------------------------|----------------------------------------------------------------------------------------------------------------------------------|
| CcrSwift_gp071 | + | caactccgctacgcctaagcc  | atg | None   | 0  | hypothetical conserved protein                                    |                                                                                                                                  |
| CcrSwift_gp072 | + | ttccagagctaaGGGcggcc   | atg | gggg   | 5  | hypothetical conserved protein                                    |                                                                                                                                  |
| CcrSwift_gp073 | + | aacccccAGGAGccctgaacc  | atg | aggag  | 9  | hypothetical conserved protein                                    |                                                                                                                                  |
| CcrSwift_gp074 | + | gcgcctcaAGGgtcttcgag   | ttg | agg    | 9  | putative lectin-like domain protein                               | IPR013320, IPR008985                                                                                                             |
| CcrSwift_gp075 | + | gctgacctGGAGGcctaagac  | atg | ggagg  | 8  | hypothetical conserved protein                                    |                                                                                                                                  |
| CcrSwift_gp076 | + | cgtggcgatgaagtcttaacg  | atg | None   | 0  | hypothetical conserved protein                                    |                                                                                                                                  |
| CcrSwift_gp077 | + | tctGGAGTttcgcagcccatc  | atg | ggag   | 14 | hypothetical conserved protein                                    |                                                                                                                                  |
| CcrSwift_gp078 | + | cgcccgccAGGgtcttccca   | atg | agg    | 9  | hypothetical conserved protein                                    |                                                                                                                                  |
| CcrSwift_gp079 | + | ggcgtccgttccGAGgaccatc | atg | gag    | 5  | hypothetical conserved protein                                    |                                                                                                                                  |
| CcrSwift_gp080 | + | agtcGGGgaccagagaccgctc | atg | gggg   | 13 | hypothetical conserved protein                                    |                                                                                                                                  |
| CcrSwift_gp081 | + | tcctgggtGGAGtttcccta   | atg | ggag   | 9  | hypothetical conserved protein                                    |                                                                                                                                  |
| CcrSwift_gp082 | + | cgccatcccagagGGAGcgcac | gtg | ggag   | 4  | putative PhoH-like protein                                        | IPR003714, SSF52540, G3DSA:3.40.50.300                                                                                           |
| CcrSwift_gp083 | + | gtgcaaaagcgtagcgcacc   | atg | None   | 0  | hypothetical conserved protein                                    |                                                                                                                                  |
| CcrSwift_gp084 | + | caagaagatcatcgcaccata  | atg | None   | 0  | hypothetical conserved protein                                    |                                                                                                                                  |
| CcrSwift_gp085 | + | cagcacgcGGAaagaagacc   | gtg | gga    | 10 | hypothetical conserved protein                                    |                                                                                                                                  |
| CcrSwift_gp086 | + | ctcgattaaaGAGGTgttcg   | atg | gaggt  | 6  | hypothetical conserved protein                                    |                                                                                                                                  |
| CcrSwift_gp087 | + | gttctggctgggaGAGGactg  | atg | gagg   | 4  | hypothetical conserved protein                                    |                                                                                                                                  |
| CcrSwift_gp088 | + | ccgtGGAttggtgacctgcc   | atg | gga    | 14 | putative major tail tube protein                                  | experimental evidence, see text                                                                                                  |
| CcrSwift_gp089 | + | cccgatccGGAGccccggacc  | atg | gga    | 10 | putative pre-tape measure chaperone protein                       | HHpred vs pdb70_18Aug12, hit 2ob9_A, prob 89.3% E=0.82; positional evidence, see text                                            |
| CcrSwift_gp090 | + | cccgatacGGAGccccggacc  | atg | gga    | 10 | putative pre-tape measure chaperone protein, frameshifted version | positional evidence, see text; slippery sequence AAAAAAC                                                                         |
| CcrSwift_gp091 | + | gcGGGcccgcataggatca    | atg | gggg   | 15 | putative tail tape measure protein                                | IPR007921, IPR013491, IPR013423; experimental evidence, see text                                                                 |
| CcrSwift_gp092 | + | tcctttcatggttaatcccg   | atg | None   | 0  | hypothetical conserved protein                                    | IPR011740                                                                                                                        |
| CcrSwift_gp093 | + | aaatccgtccccgaagaccgt  | atg | None   | 0  | putative tail protein                                             | IPR019228, IPR018964, IPR011928; experimental evidence, see text                                                                 |
| CcrSwift_gp094 | + | gcccacgcctccGGAGcagga  | atg | ggag   | 5  | putative NlpC/P60 family cell wall peptidase                      | IPR000064, SSF54001, G3DSA:3.90.1720.10                                                                                          |
| CcrSwift_gp095 | + | ccccggcgttAGGActaatc   | atg | agga   | 6  | putative tail protein                                             | IPR007110; experimental evidence, see text                                                                                       |
| CcrSwift_gp096 | + | gtcataaaaagtcgtggaacg  | atg | None   | 0  | hypothetical conserved protein                                    |                                                                                                                                  |
| CcrSwift_gp097 | + | cctcaAGGgctcatcctgca   | atg | agg    | 13 | putative tail protein                                             | IPR000421, IPR008979, G3DSA:2.60.120.260; experimental evidence, see text                                                        |
| CcrSwift_gp098 | + | accctcaagGGAatccgatag  | atg | gga    | 9  | hypothetical conserved protein                                    |                                                                                                                                  |
| CcrSwift_gp099 | + | tcctcatgctccGGAGcctgac | atg | ggag   | 6  | hypothetical conserved protein                                    |                                                                                                                                  |
| CcrSwift_gp100 | + | tcagacctccGGAatccacc   | atg | gga    | 7  | putative endolysin                                                | IPR002196, SSF53955, G3DSA:1.10.530.40                                                                                           |
| CcrSwift_gp101 | + | gggcttcaAGGcgtgctgatc  | atg | agg    | 10 | putative inner membrane spanin component                          | N-terminal TMD, outer membrane spanin component embedded in +1 frame, see text                                                   |
| CcrSwift_gp102 | + | agtaaccaAGGTattcaacg   | atg | gaggt  | 8  | putative outer membrane spanin component                          | lipoprotein embedded in inner membrane spanin component, see text                                                                |
| CcrSwift_gp103 | + | caagctcaaGGGgaagacgca  | gtg | gggg   | 8  | putative holin protein                                            | predicted 4 TMDs, see text                                                                                                       |
| CcrSwift_gp104 | + | cgctatacGGAGtagggacc   | atg | ggag   | 8  | hypothetical conserved protein                                    |                                                                                                                                  |
| CcrSwift_gp105 | + | cgacggacggAGGAGaacgaa  | atg | aggag  | 6  | putative HTH domain DNA-binding protein                           | IPR001387, IPR010982, G3DSA:1.10.260.40                                                                                          |
| CcrSwift_gp106 | - | ttaaaccaGAGccccaaaata  | atg | gagg   | 10 | putative dUTP pyrophosphatase                                     | IPR008181, IPR008180, SSF51283, PTHR11241, G3DSA:2.70.40.10                                                                      |
| CcrSwift_gp107 | - | tccttttctcGAGcccccttc  | atg | gag    | 8  | putative ribonucleoside diphosphate reductase beta subunit        | IPR012348, IPR012335, IPR000358, IPR002109, IPR009078, IPR012336, IPR011767                                                      |
| CcrSwift_gp108 | - | tcgacgcGAGaacGAGacc    | atg | gag    | 5  | putative ribonucleoside diphosphate reductase alpha subunit       | IPR006141, IPR003587, IPR000788, IPR013509, IPR008926, SSF51294, SSF51998, G3DSA:2.170.16.10, G3DSA:3.20.70.20                   |
| CcrSwift_gp109 | - | cggtggtGGGctggctggcg   | ttg | gggg   | 9  | hypothetical conserved protein                                    |                                                                                                                                  |
| CcrSwift_gp110 | - | tcctcatgcagcAGGAtccc   | atg | agga   | 5  | hypothetical conserved protein                                    |                                                                                                                                  |
| CcrSwift_gp111 | - | acgacatcaccGGAGcccgagc | atg | ggag   | 6  | hypothetical conserved protein                                    |                                                                                                                                  |
| CcrSwift_gp112 | - | gagcccgaccAGGActgatcc  | atg | agga   | 7  | putative thymidylate synthase                                     | IPR003669                                                                                                                        |
| CcrSwift_gp113 | - | atccttcgctAGGAGaacccc  | atg | aggag  | 6  | putative dNMP kinase                                              | HHpred vs pdb70_18Aug12, hit 2grj_A, prob 99.9% E=3.6E-27; SSF52540, G3DSA:3.40.50.300                                           |
| CcrSwift_gp114 | - | aaagatcaAGGacggcacaacc | ctg | agga   | 10 | putative RecD-like helicase                                       | HHpred vs pdb70_18Aug12, hit 3e1s_A, prob 100% E=1.3E-45; SSF52540, G3DSA:3.40.50.300                                            |
| CcrSwift_gp115 | - | acagaaaaTAGGTatcagcaa  | atg | aggt   | 8  | hypothetical conserved protein                                    |                                                                                                                                  |
| CcrSwift_gp116 | - | aGAGaaatgtgacggtgagc   | atg | gag    | 17 | hypothetical conserved protein                                    |                                                                                                                                  |
| CcrSwift_gp117 | - | caagatgcgGAGaaagccgc   | gtg | ggag   | 8  | hypothetical conserved protein                                    |                                                                                                                                  |
| CcrSwift_gp118 | - | actcccgaacGAGatcggccg  | atg | gag    | 8  | putative exoribonuclease, Pol III-like                            | IPR006055, IPR013520, IPR012337, G3DSA:3.30.420.10                                                                               |
| CcrSwift_gp119 | - | ccactggccGAGAcgcgactg  | atg | ggag   | 8  | hypothetical conserved protein                                    |                                                                                                                                  |
| CcrSwift_gp120 | - | atcaaatctcaAGGTgctcc   | atg | aggt   | 5  | putative Pol I DNA polymerase, T7-like                            | IPR001098, IPR012337, SSF56672, PTHR10133, G3DSA:1.10.150.20, G3DSA:1.20.1060.10, G3DSA:3.30.420.10, G3DSA:3.30.70.370; see text |
| CcrSwift_gp121 | - | acatccgttaaccatagagcc  | atg | None   | 0  | putative DNA cytosine methyltransferase                           | IPR001525, IPR018117, SSF53335, PTHR10629SF11, G3DSA:3.40.50.150, G3DSA:3.90.120.10                                              |
| CcrSwift_gp122 | - | ggccgctgtaagcGAGGctccc | atg | gagg   | 4  | hypothetical conserved protein                                    |                                                                                                                                  |
| CcrSwift_gp123 | - | gcgcacaaaccGAGGctctct  | atg | ggag   | 7  | putative TS A1-like protein                                       | blastP to TS A1 (AAU05157), E=1.71E-89, 34.2% Dice identity; HHpred vs pdb70_18Aug12, hit 1g2h_A, prob 94.0% E=0.05              |
| CcrSwift_gp124 | - | tcoggatatgccAGGAccccc  | ctg | agga   | 5  | putative DNA methylase                                            | IPR002052, SSF53335, G3DSA:3.40.50.150                                                                                           |
| CcrSwift_gp125 | - | cAGGAcctatgacgggtgctc  | ctg | agga   | 16 | hypothetical conserved protein                                    |                                                                                                                                  |
| CcrSwift_gp126 | - | aaagatcgctatcgttgcg    | atg | None   | 0  | hypothetical conserved protein                                    |                                                                                                                                  |
| CcrSwift_gp127 | - | tatcgcaAGGTcatggacac   | gtg | aggt   | 9  | hypothetical conserved protein                                    |                                                                                                                                  |
| CcrSwift_gp128 | - | cgtaaacacgctgcgccgcc   | atg | None   | 0  | putative DNA helicase                                             | IPR014001, IPR001650, IPR000330, IPR014021, SSF52540, PTHR10799, G3DSA:3.40.50.300                                               |
| CcrSwift_gp129 | + | ccggtcaacAGGAGaacatc   | atg | aggag  | 7  | hypothetical conserved protein                                    |                                                                                                                                  |
| CcrSwift_gp130 | + | gaaatcaAGGAGGctgctg    | atg | aggagg | 7  | hypothetical conserved protein                                    |                                                                                                                                  |
| CcrSwift_gp131 | - | ccccgcgcacAGGccccctg   | atg | agg    | 7  | hypothetical conserved protein                                    |                                                                                                                                  |
| CcrSwift_gp132 | - | accacAGGAGTctcggttac   | ctg | gaggt  | 10 | hypothetical conserved protein                                    |                                                                                                                                  |
| CcrSwift_gp133 | - | cgccctttcaAGGAtcgccc   | atg | agga   | 7  | hypothetical conserved protein                                    |                                                                                                                                  |
| CcrSwift_gp134 | - | gcccgtctcaAGGAGcagacc  | atg | aggag  | 6  | Putative rllb-like protein                                        | PD130832                                                                                                                         |
| CcrSwift_gp135 | - | gcctgcctttcGAGGtttgcc  | atg | ggag   | 6  | putative rlla-like protein                                        | IPR003594                                                                                                                        |
| CcrSwift_gp136 | + | ggcaaacctccgaaAGGAGGc  | ttg | agg    | 1  | hypothetical conserved protein                                    |                                                                                                                                  |
| CcrSwift_gp137 | + | gcctAGGAGctgctcgtatc   | atg | gagg   | 13 | hypothetical conserved protein                                    |                                                                                                                                  |
| CcrSwift_gp138 | + | cgtatggtacgcAGGAtgac   | atg | agga   | 4  | hypothetical conserved protein                                    |                                                                                                                                  |
| CcrSwift_gp139 | + | caccgacggcgctcctcca    | ttg | None   | 0  | hypothetical conserved protein                                    |                                                                                                                                  |
| CcrSwift_gp140 | + | acgacaacgaAGGAGTcttc   | atg | aggagg | 4  | putative tyrosine recombinase                                     | IPR013762, IPR002104, IPR011010                                                                                                  |
| CcrSwift_gp141 | + | gtcctgcgatAGGAGGcgcg   | atg | aggagg | 5  | hypothetical conserved protein                                    |                                                                                                                                  |
| CcrSwift_gp142 | + | ccgctagtccAGGAGtaccgt  | ttg | aggag  | 6  | hypothetical conserved protein                                    |                                                                                                                                  |
| CcrSwift_gp143 | + | accocccctccgacAGGcttc  | atg | agg    | 4  | hypothetical conserved protein                                    |                                                                                                                                  |
| CcrSwift_gp144 | + | atcgctcctGGGccttttga   | gtg | gggg   | 8  | hypothetical conserved protein                                    |                                                                                                                                  |

|                |   |                        |     |         |    |                                               |                                                               |
|----------------|---|------------------------|-----|---------|----|-----------------------------------------------|---------------------------------------------------------------|
| CcrSwift_gp145 | + | tcctgtacggttaagGGAAAac | atg | gga     | 4  | hypothetical conserved protein                |                                                               |
| CcrSwift_gp146 | + | acgattcCGAGAttatcatgaa | atg | ggag    | 10 | putative HTH domain protein                   | IPR001387, G3DSA:1.10.260.40                                  |
| CcrSwift_gp147 | + | cctgtattcctGAGGTcccgc  | atg | gaggt   | 5  | putative tRNA amidotransferase domain protein | IPR019004, IPR003789                                          |
| CcrSwift_gp148 | - | actgatcgaGGGaaagttag   | atg | gggg    | 8  | putative DNA ligase                           | IPR012340, IPR016027, SSF56091, G3DSA:3.30.470.30             |
| CcrSwift_gp149 | - | tcgatccCGAGAtttttcggcg | atg | ggag    | 10 | hypothetical conserved protein                |                                                               |
| CcrSwift_gp150 | - | gccatccccctctatctccgag | gtg | None    | 0  | hypothetical conserved protein                |                                                               |
| CcrSwift_gp151 | - | gtttcAGGgcaaatgtcAGGa  | atg | agg     | 1  | DUF1643 protein                               | IPR012441                                                     |
| CcrSwift_gp152 | - | gcctcgccctgaaAGGAggca  | atg | agga    | 4  | hypothetical conserved protein                |                                                               |
| CcrSwift_gp153 | - | gAGGccaagaagcggccaacg  | gtg | agg     | 17 | hypothetical conserved protein                |                                                               |
| CcrSwift_gp154 | - | ctGGAtcggccccggcgcctg  | atg | gga     | 16 | hypothetical conserved protein                |                                                               |
| CcrSwift_gp155 | - | gcttttgAGGAttttgagcgt  | atg | aggag   | 9  | hypothetical conserved protein                |                                                               |
| CcrSwift_gp156 | - | agcaggactAGGAAaaagacc  | atg | aggag   | 7  | hypothetical conserved protein                |                                                               |
| CcrSwift_gp157 | - | cgacgccaAGGAcgtctgccca | atg | agga    | 9  | hypothetical conserved protein                |                                                               |
| CcrSwift_gp158 | - | ggccggctacGAGatcgctcg  | atg | gag     | 8  | putative lipoprotein                          | LipoP                                                         |
| CcrSwift_gp159 | - | cgcttaaaGGGGgacccatc   | atg | gggg    | 8  | putative nicotinate phosphoribosyltransferase | IPR015977, IPR002638, PTHR11098                               |
| CcrSwift_gp160 | - | cagaatgaGGGTaaagcgata  | gtg | gggg    | 9  | putative NUDIX hydrolase domain protein       | IPR014729, IPR000086, IPR015797, SSF52374, P551462, PTHR22769 |
| CcrSwift_gp161 | - | caaaagcgtagtgctcgagagc | atg | None    | 0  | hypothetical conserved protein                |                                                               |
| CcrSwift_gp162 | - | cgcaaacgctgGGAActctctg | atg | gga     | 7  | putative peptidyl-tRNA hydrolase              | IPR002833, SSF102462, PTHR12649, G3DSA:3.40.1490.10           |
| CcrSwift_gp163 | - | agcgcggcgccGAGGgctg    | atg | gagg    | 4  | hypothetical conserved protein                |                                                               |
| CcrSwift_gp164 | - | taacctccagcAGGAGaccgc  | atg | aggag   | 5  | hypothetical conserved protein                |                                                               |
| CcrSwift_gp165 | - | acaaacggcGAGGcccttttc  | atg | ggagg   | 8  | hypothetical conserved protein                |                                                               |
| CcrSwift_gp166 | - | ccccgatctccGAGaagcccc  | atg | gag     | 7  | putative HD-domain/PDEase-like protein        | SSF109604                                                     |
| CcrSwift_gp167 | - | gggagaattctcGAGGgtcgc  | atg | gagg    | 5  | hypothetical conserved protein                |                                                               |
| CcrSwift_gp168 | - | acgcccagaAGGActgatcct  | atg | agga    | 8  | putative DNA-binding domain protein           | IPR016177, SSF54060                                           |
| CcrSwift_gp169 | - | gagggcctcGAGaaagtaagcc | atg | ggag    | 9  | hypothetical conserved protein                |                                                               |
| CcrSwift_gp170 | - | tcttgagaAGGAacaaacctg  | atg | agga    | 9  | hypothetical conserved protein                |                                                               |
| CcrSwift_gp171 | - | tcaacaAGGcgaagaaccccg  | atg | agg     | 12 | hypothetical conserved protein                |                                                               |
| CcrSwift_gp172 | - | caagcAGGcgcgcggtctgct  | ttg | agg     | 13 | hypothetical conserved protein                |                                                               |
| CcrSwift_gp173 | - | gctgttcgactGGAGaaaatc  | gtg | ggag    | 6  | hypothetical conserved protein                |                                                               |
| CcrSwift_gp174 | - | ctctcgctgaAGGgctAGGcc  | atg | agg     | 2  | hypothetical conserved protein                |                                                               |
| CcrSwift_gp175 | - | acaccacagaAGGAGccccgc  | gtg | aggag   | 6  | putative RtcB-like protein                    | IPR001233                                                     |
| CcrSwift_gp176 | - | cgtaccctcaAGGTgatccc   | atg | aggt    | 6  | hypothetical conserved protein                |                                                               |
| CcrSwift_gp177 | - | ctctgaccgcccctcgcccctg | atg | None    | 0  | putative band 7 lipoprotein                   | IPR001107                                                     |
| CcrSwift_gp178 | - | gctcctgaaAGGAcgtgctca  | atg | agga    | 8  | hypothetical conserved protein                |                                                               |
| CcrSwift_gp179 | - | gcagcGGGgctcgcgccctg   | atg | gggg    | 11 | hypothetical conserved protein                |                                                               |
| CcrSwift_gp180 | - | acgacaacgaAGGAGaccctc  | atg | aggag   | 6  | hypothetical conserved protein                |                                                               |
| CcrSwift_gp181 | - | caggatGGAGGcccgccca    | atg | ggagg   | 10 | hypothetical conserved protein                |                                                               |
| CcrSwift_gp182 | - | tccagaccaAGGAGcctgat   | ttg | aggag   | 7  | hypothetical conserved protein                |                                                               |
| CcrSwift_gp183 | - | cgacagcgaAGGAGcccgcc   | atg | aggag   | 6  | hypothetical conserved protein                |                                                               |
| CcrSwift_gp184 | - | gaaacctggagaAGGAGccgc  | atg | agga    | 5  | hypothetical conserved protein                |                                                               |
| CcrSwift_gp185 | - | ggtcctgtcggcgcaaatcc   | gtg | None    | 0  | hypothetical conserved protein                |                                                               |
| CcrSwift_gp186 | - | tctgaaAGGctcgacctcctg  | atg | agg     | 12 | hypothetical conserved protein                |                                                               |
| CcrSwift_gp187 | - | cgttccaaactcgcAGGTctcc | gtg | aggt    | 4  | hypothetical conserved protein                |                                                               |
| CcrSwift_gp188 | - | cctgggctcGGAGaagcaect  | gtg | ggag    | 8  | hypothetical conserved protein                |                                                               |
| CcrSwift_gp189 | - | actggcgaAGGTgtcggacca  | atg | aggt    | 9  | hypothetical conserved protein                |                                                               |
| CcrSwift_gp190 | - | acaaacggcAGGAGaccctc   | gtg | aggag   | 6  | hypothetical conserved protein                |                                                               |
| CcrSwift_gp191 | - | cgGGAtgcttccggctcgag   | atg | gga     | 16 | hypothetical conserved protein                |                                                               |
| CcrSwift_gp192 | - | cgcccgaaaAGGcgaAGGccc  | atg | agg     | 3  | hypothetical conserved protein                |                                                               |
| CcrSwift_gp193 | - | cgccgacGGAGagctactgcy  | atg | ggag    | 10 | putative winged-helix HTH DNA binding protein | IPR011991                                                     |
| CcrSwift_gp194 | - | taacggccaatGAGgcccag   | atg | gag     | 6  | hypothetical conserved protein                |                                                               |
| CcrSwift_gp195 | - | ccaccgcgcccggcggagag   | gtg | None    | 0  | hypothetical conserved protein                |                                                               |
| CcrSwift_gp196 | - | cagcgcggcAGGgttcccgc   | atg | agg     | 8  | hypothetical conserved protein                |                                                               |
| CcrSwift_gp197 | - | aaaggttcAGGAGTctgccg   | atg | aggaggt | 5  | hypothetical conserved protein                |                                                               |
| CcrSwift_gp198 | - | gacgacaacgAGGAGGccctg  | atg | aggagg  | 5  | putative ArdC-like antirestriction protein    | IPR017113, IPR013610                                          |
| CcrSwift_gp199 | - | cgccgagataatGAGgcccct  | atg | gag     | 6  | hypothetical conserved protein                |                                                               |
| CcrSwift_gp200 | - | ggacctGGAGaaacaccccg   | atg | ggag    | 11 | hypothetical conserved protein                |                                                               |
| CcrSwift_gp201 | - | gggcccggGAGGcgggcctc   | atg | ggagg   | 9  | hypothetical conserved protein                |                                                               |
| CcrSwift_gp202 | - | cgctcgccaGAGcctcaagt   | atg | gag     | 9  | hypothetical conserved protein                |                                                               |
| CcrSwift_gp203 | - | aacgacaccagggGAGagccc  | gtg | ggag    | 4  | putative acyl carrier protein                 | IPR009081, IPR006163, PTHR20863                               |
| CcrSwift_gp204 | - | tcgacaacggcgaAGGAcggt  | atg | agga    | 5  | putative NH endonuclease                      | IPR002711                                                     |
| CcrSwift_gp205 | - | ctcattcgttaAGGAtcgacc  | atg | agga    | 6  | hypothetical conserved protein                |                                                               |
| CcrSwift_gp206 | - | cgttccgggctatcaagccg   | atg | None    | 0  | hypothetical conserved protein                |                                                               |
| CcrSwift_gp207 | - | tggGGAgaagctgaagtgagc  | atg | ggag    | 14 | hypothetical conserved protein                |                                                               |
| CcrSwift_gp208 | - | cgcttcGAGTcgaagcctg    | atg | gaggt   | 9  | hypothetical conserved protein                |                                                               |
| CcrSwift_gp209 | - | tccggacctcGGAGaagggccc | gtg | ggag    | 7  | hypothetical conserved protein                |                                                               |
| CcrSwift_gp210 | - | gcggttcGAGGAtcgaagcc   | ttg | aggag   | 8  | hypothetical conserved protein                |                                                               |
| CcrSwift_gp211 | - | gacgacaacgggaAGGaaacct | atg | agga    | 5  | hypothetical conserved protein                |                                                               |
| CcrSwift_gp212 | - | cggtgactcggccaAGGggac  | ctg | agg     | 4  | hypothetical conserved protein                |                                                               |
| CcrSwift_gp213 | - | ctatcgcttcAGGAGGctcg   | atg | aggagg  | 4  | hypothetical conserved protein                |                                                               |
| CcrSwift_gp214 | - | cttcaagcggcAGGAtcaccg  | ttg | agga    | 6  | hypothetical conserved protein                |                                                               |
| CcrSwift_gp215 | - | gacgacaacaAGGAGGccctcc | atg | aggagg  | 5  | hypothetical conserved protein                |                                                               |
| CcrSwift_gp216 | - | ctacgtGGAGagccggcgccg  | atg | ggag    | 11 | hypothetical conserved protein                |                                                               |
| CcrSwift_gp217 | - | cgcccaattccGAGtgacc    | atg | ggag    | 5  | hypothetical conserved protein                | SSF56784                                                      |
| CcrSwift_gp218 | - | ggcctcgcgGAGGccctgtg   | atg | ggag    | 7  | hypothetical conserved protein                |                                                               |

|                |   |                         |     |        |    |                                         |                                                             |
|----------------|---|-------------------------|-----|--------|----|-----------------------------------------|-------------------------------------------------------------|
| CcrSwift_gp219 | - | gagactagggTGGGatgcca    | ttg | gggg   | 6  | hypothetical conserved protein          |                                                             |
| CcrSwift_gp220 | - | gatcaagtcGAGGccctgagc   | atg | gagg   | 8  | hypothetical conserved protein          |                                                             |
| CcrSwift_gp221 | - | ggctcccgtaccAGGAtaccct  | atg | agga   | 6  | hypothetical conserved protein          |                                                             |
| CcrSwift_gp222 | - | caccgggctcgtggcgccctg   | atg | None   | 0  | hypothetical conserved protein          |                                                             |
| CcrSwift_gp223 | - | agcagaAGGAGGaaagccgctc  | atg | aggagg | 9  | putative HTH domain DNA-binding protein | IPR010982, IPR001387, G3DSA:1.10.260.40                     |
| CcrSwift_gp224 | - | aatcgcccAGGcgcccgctg    | atg | agg    | 10 | hypothetical conserved protein          |                                                             |
| CcrSwift_gp225 | - | acaacgacagaAGGAGGccgc   | gtg | aggagg | 4  | hypothetical conserved protein          |                                                             |
| CcrSwift_gp226 | - | gagcgcgccaAGGAGGccagctc | gtg | gggg   | 6  | hypothetical conserved protein          |                                                             |
| CcrSwift_gp227 | - | cactgtccggaAGGTCgagcc   | atg | aggt   | 6  | hypothetical conserved protein          |                                                             |
| CcrSwift_gp228 | - | ggtctatcgcggGAGGccgctg  | atg | ggagg  | 5  | putative Pol I DNA polymerase           | IPR001098, IPR002298, SSF56672, G3DSA:3.30.70.370           |
| CcrSwift_gp229 | - | agatcaAGGAGTagtcaagc    | gtg | aggag  | 10 | putative GcrA-like cell cycle regulator | IPR011681; see text                                         |
| CcrSwift_gp230 | - | gcccacaattcGAGGggaag    | atg | gagg   | 5  | hypothetical conserved protein          |                                                             |
| CcrSwift_gp231 | + | cgacaacgaaaAGGAGccctgcc | atg | aggag  | 6  | hypothetical conserved protein          |                                                             |
| CcrSwift_gp232 | + | cgccacGAGGctcgcccaatg   | atg | gagg   | 11 | hypothetical conserved protein          |                                                             |
| CcrSwift_gp233 | + | caagatcGAGGaaGAGGtctg   | atg | gagg   | 4  | hypothetical conserved protein          |                                                             |
| CcrSwift_gp234 | + | caagctcaagaaAGGccgctc   | atg | agg    | 6  | hypothetical conserved protein          |                                                             |
| CcrSwift_gp235 | + | cattctcgactAGGAGGacc    | atg | aggagg | 4  | hypothetical conserved protein          |                                                             |
| CcrSwift_gp236 | + | tcgatttctctggcgccgccc   | atg | None   | 0  | hypothetical conserved protein          |                                                             |
| CcrSwift_gp237 | + | gttcttggAAGTcaggaactg   | atg | aggt   | 8  | hypothetical conserved protein          |                                                             |
| CcrSwift_gp238 | + | agcgcgagcccgAGGActgac   | atg | agga   | 5  | hypothetical conserved protein          |                                                             |
| CcrSwift_gp239 | + | cgacagcgaAAGGAGccctgcc  | ttg | aggag  | 6  | hypothetical conserved protein          |                                                             |
| CcrSwift_gp240 | + | tcggatgctGGAGGTCgcgcc   | ttg | ggagg  | 6  | hypothetical conserved protein          |                                                             |
| CcrSwift_gp241 | + | cgccgtgAGGAGatgctgccc   | gtg | aggag  | 8  | hypothetical conserved protein          |                                                             |
| CcrSwift_gp242 | + | cgccgacttcaAGGAcagcgc   | atg | agga   | 6  | hypothetical conserved protein          |                                                             |
| CcrSwift_gp243 | + | gcccgcGAGGccagaccgac    | gtg | ggagg  | 10 | hypothetical conserved protein          |                                                             |
| CcrSwift_gp244 | + | tcaagctGAGGaccctctgac   | atg | ggag   | 10 | hypothetical conserved protein          |                                                             |
| CcrSwift_gp245 | + | acgacaacagagAGGAGttccc  | atg | aggag  | 5  | hypothetical conserved protein          |                                                             |
| CcrSwift_gp246 | + | cacggaatgGAGGattttcca   | atg | ggag   | 8  | hypothetical conserved protein          |                                                             |
| CcrSwift_gp247 | + | ggcctGGAGatcatcgccctag  | atg | ggag   | 12 | hypothetical conserved protein          |                                                             |
| CcrSwift_gp248 | + | acctcgagcAGGAGGactaa    | atg | aggagg | 5  | hypothetical conserved protein          |                                                             |
| CcrSwift_gp249 | + | ggcccccgAGGAAcccaaaagc  | atg | agga   | 9  | hypothetical conserved protein          |                                                             |
| CcrSwift_gp250 | + | ggtcagcAGGAGcatgcccgtc  | atg | agga   | 9  | hypothetical conserved protein          |                                                             |
| CcrSwift_gp251 | + | gacgacaacgAGGAGGcttccg  | atg | aggagg | 5  | hypothetical conserved protein          |                                                             |
| CcrSwift_gp252 | + | gtcaaaagAGGAGGccctgagcc | ttg | aggagg | 8  | hypothetical conserved protein          |                                                             |
| CcrSwift_gp253 | + | ggcgccctacGAGGccccgca   | atg | gagg   | 7  | hypothetical conserved protein          |                                                             |
| CcrSwift_gp254 | + | ccggcagAGGAGTtgcctgac   | atg | aggag  | 10 | hypothetical conserved protein          |                                                             |
| CcrSwift_gp255 | + | tggagcacaacAGGAGGgacc   | atg | aggagg | 4  | hypothetical conserved protein          |                                                             |
| CcrSwift_gp256 | + | ctacgtgaAGGAGctgctcg    | atg | agga   | 9  | hypothetical conserved protein          |                                                             |
| CcrSwift_gp257 | + | tcagctGGGGctggctgctg    | atg | gggg   | 9  | hypothetical conserved protein          |                                                             |
| CcrSwift_gp258 | + | gacccaGGGGgtttccgaggc   | atg | gggg   | 10 | hypothetical conserved protein          |                                                             |
| CcrSwift_gp259 | + | cctcgacgcAGGAAaagctc    | atg | agga   | 7  | hypothetical conserved protein          |                                                             |
| CcrSwift_gp260 | + | cctgaAGGAGgcccgaacc     | atg | agga   | 12 | hypothetical conserved protein          |                                                             |
| CcrSwift_gp261 | + | ttgtcttGAAaagccagcgc    | atg | gag    | 11 | DUF1937 protein                         | IPR015235, SSF52309                                         |
| CcrSwift_gp262 | + | gagcaaccagGAGGatggaagc  | gtg | ggag   | 8  | hypothetical conserved protein          |                                                             |
| CcrSwift_gp263 | + | ggtgtcccaGAGGTaccagcg   | atg | gaggt  | 7  | hypothetical conserved protein          |                                                             |
| CcrSwift_gp264 | + | ccggcgccctatGGAGagagcc  | atg | ggag   | 6  | putative TAT signal protein             | IPR006311; PRED-TAT                                         |
| CcrSwift_gp265 | + | cctGGAtatggcgaagaccgc   | atg | gga    | 15 | hypothetical conserved protein          |                                                             |
| CcrSwift_gp266 | + | acgtcaacaAGGAGccccaccg  | atg | aggag  | 7  | hypothetical conserved protein          |                                                             |
| CcrSwift_gp267 | + | agaagcccgcggcgccgagtg   | atg | None   | 0  | hypothetical conserved protein          |                                                             |
| CcrSwift_gp268 | + | gcggtcgaaatcctGGAGacc   | ctg | gga    | 4  | hypothetical conserved protein          |                                                             |
| CcrSwift_gp269 | + | gcccgtcgatGGAGGaaagcg   | atg | gga    | 4  | hypothetical conserved protein          |                                                             |
| CcrSwift_gp270 | + | cgaggaagAGGAGGcctgctg   | atg | aggag  | 8  | putative Ser/Thr protein phosphatase    | IPR004843, IPR006186, SSF56300, PTHR11668, G3DSA:3.60.21.10 |
| CcrSwift_gp271 | + | gttgatcccgAGGAGcagcgc   | atg | agga   | 6  | hypothetical conserved protein          |                                                             |
| CcrSwift_gp272 | + | gacgacaacgAGGAGGccccac  | atg | aggagg | 5  | hypothetical conserved protein          |                                                             |
| CcrSwift_gp273 | + | catgaccaAGGccgcttctg    | atg | gag    | 9  | hypothetical conserved protein          |                                                             |
| CcrSwift_gp274 | + | gatcatcctgGAGGacgcccgc  | atg | ggag   | 7  | hypothetical conserved protein          |                                                             |
| CcrSwift_gp275 | + | cgacgacaacgAGGAGGcccc   | atg | aggagg | 4  | hypothetical conserved protein          |                                                             |
| CcrSwift_gp276 | + | cttctgctcggtgaaagcctg   | atg | None   | 0  | hypothetical conserved protein          |                                                             |
| CcrSwift_gp277 | + | gccacggaaAGGAGGcctgac   | atg | agga   | 7  | hypothetical conserved protein          |                                                             |
| CcrSwift_gp278 | + | acgagcgcagGAGGgctgac    | atg | ggagg  | 6  | hypothetical conserved protein          |                                                             |
| CcrSwift_gp279 | + | tcccgaAGGccctaaagtcc    | atg | gggg   | 10 | hypothetical conserved protein          |                                                             |
| CcrSwift_gp280 | + | aacggaAGGAcctgaaagacc   | atg | agga   | 11 | hypothetical conserved protein          |                                                             |
| CcrSwift_gp281 | + | acaacgcccGAGGcccttttc   | atg | ggagg  | 8  | hypothetical conserved protein          |                                                             |
| CcrSwift_gp282 | + | cgcccttgcgaacctcgccca   | atg | None   | 0  | hypothetical conserved protein          |                                                             |
| CcrSwift_gp283 | + | acgccaagaAGGccgctgac    | atg | agg    | 9  | hypothetical conserved protein          |                                                             |
| CcrSwift_gp284 | + | ccagatcaAGGAGGccccagtc  | ttg | aggagg | 7  | hypothetical conserved protein          |                                                             |
| CcrSwift_gp285 | + | caatcagcaataGGGGccagc   | atg | gggg   | 5  | hypothetical conserved protein          |                                                             |
| CcrSwift_gp286 | + | ctgggcccGAGGcctcgccgcg  | atg | gagg   | 10 | hypothetical conserved protein          |                                                             |
| CcrSwift_gp287 | + | cggacatagAGGAGcaaccgc   | atg | aggag  | 7  | hypothetical conserved protein          |                                                             |
| CcrSwift_gp288 | + | tcgcccctgAGGAGGaccgc    | atg | aggagg | 5  | hypothetical conserved protein          |                                                             |
| CcrSwift_gp289 | + | gcttgagaAGGcgttcggcca   | atg | agg    | 10 | hypothetical conserved protein          |                                                             |
| CcrSwift_gp290 | + | ccaagcctcGGGGctgtttcca  | atg | gggg   | 8  | hypothetical conserved protein          |                                                             |
| CcrSwift_gp291 | + | caccgactactAGGAGGtccc   | atg | aggagg | 4  | hypothetical conserved protein          |                                                             |
| CcrSwift_gp292 | + | tcgctaggacaAGGAGGcccc   | atg | aggagg | 4  | hypothetical conserved protein          |                                                             |

|                |   |                         |     |        |    |                                     |                                                                                                               |
|----------------|---|-------------------------|-----|--------|----|-------------------------------------|---------------------------------------------------------------------------------------------------------------|
| CcrSwift_gp293 | + | acgacaacAGGAGGcccccc    | ttg | aggagg | 7  | hypothetical conserved protein      |                                                                                                               |
| CcrSwift_gp294 | + | ttgcggtcatgAGGAttcgaa   | atg | agga   | 6  | hypothetical conserved protein      |                                                                                                               |
| CcrSwift_gp295 | + | ccggcggctgacgggtgcgtc   | atg | None   | 0  | hypothetical conserved protein      |                                                                                                               |
| CcrSwift_gp296 | + | gacgacaacgAGGAGGcccccc  | atg | aggagg | 5  | hypothetical conserved protein      |                                                                                                               |
| CcrSwift_gp297 | + | ggactacatcGAGGTgacct    | gtg | gaggt  | 6  | hypothetical conserved protein      |                                                                                                               |
| CcrSwift_gp298 | + | ccttagccgGGAGGcgagcc    | ttg | ggagg  | 7  | hypothetical conserved protein      |                                                                                                               |
| CcrSwift_gp299 | + | gacggcGGAGGccccggcctg   | atg | ggagg  | 10 | hypothetical conserved protein      |                                                                                                               |
| CcrSwift_gp300 | + | ggaacAGGAGGccccggcctg   | atg | aggag  | 11 | hypothetical conserved protein      |                                                                                                               |
| CcrSwift_gp301 | + | gatcggcgactGGAGaacgc    | atg | ggag   | 5  | hypothetical conserved protein      |                                                                                                               |
| CcrSwift_gp302 | + | cgggcgggtcaAGGTgagcgc   | atg | aggt   | 6  | hypothetical conserved protein      |                                                                                                               |
| CcrSwift_gp303 | + | tttcatcgccGAGGccccctg   | atg | gagg   | 7  | hypothetical conserved protein      |                                                                                                               |
| CcrSwift_gp304 | + | acgctgcgaAGGAGccccctgac | ttg | aggag  | 7  | hypothetical conserved protein      |                                                                                                               |
| CcrSwift_gp305 | + | ccagatcAGGAaggccgcccgc  | atg | agga   | 10 | hypothetical conserved protein      |                                                                                                               |
| CcrSwift_gp306 | + | tcgacacacggcaAGGTaccgc  | atg | aggt   | 4  | hypothetical conserved protein      |                                                                                                               |
| CcrSwift_gp307 | + | cgccctgcatgcGAGGggcctg  | atg | gagg   | 5  | hypothetical conserved protein      |                                                                                                               |
| CcrSwift_gp308 | + | gatctacaagccggctgcgctg  | atg | None   | 0  | hypothetical conserved protein      |                                                                                                               |
| CcrSwift_gp309 | + | gctcgccaAGGAcgtggtgtg   | atg | agga   | 9  | hypothetical conserved protein      |                                                                                                               |
| CcrSwift_gp310 | + | ccgctGGAGcttccgcccac    | atg | ggag   | 11 | hypothetical conserved protein      |                                                                                                               |
| CcrSwift_gp311 | + | cctcggctGGAagtccctcgtc  | atg | gga    | 10 | hypothetical conserved protein      |                                                                                                               |
| CcrSwift_gp312 | + | cctggagtatcGGGtccgggc   | gtg | gggg   | 6  | putative HNH homing endonuclease    | IPR002711                                                                                                     |
| CcrSwift_gp313 | + | aacgggctagaccGAGggcc    | atg | gga    | 4  | hypothetical conserved protein      |                                                                                                               |
| CcrSwift_gp314 | + | gatccttccGGAGGacgcgcc   | gtg | ggagg  | 7  | hypothetical conserved protein      |                                                                                                               |
| CcrSwift_gp315 | + | caggctgaaGAGaccggcgccg  | atg | gag    | 9  | hypothetical conserved protein      |                                                                                                               |
| CcrSwift_gp316 | + | caccctcaacaAGGAGccccct  | gtg | aggag  | 5  | hypothetical conserved protein      |                                                                                                               |
| CcrSwift_gp317 | + | ccgctcctgaGAGGccccaaag  | atg | gagg   | 7  | hypothetical conserved protein      |                                                                                                               |
| CcrSwift_gp318 | + | taagaaatgAGGAaatacatcc  | atg | agga   | 9  | hypothetical conserved protein      |                                                                                                               |
| CcrSwift_gp319 | + | aaggccccctcgGAGcccccc   | atg | ggag   | 6  | hypothetical conserved protein      |                                                                                                               |
| CcrSwift_gp320 | + | ccatcgctGAGaccctcccc    | atg | gag    | 9  | hypothetical conserved protein      |                                                                                                               |
| CcrSwift_gp321 | + | cgccgacGGGtccgacctgac   | gtg | gggg   | 10 | putative RNaseH-like domain protein | IPR012337                                                                                                     |
| CcrSwift_gp322 | + | cgaccggcGGAGtttccggc    | ttg | ggag   | 8  | hypothetical conserved protein      |                                                                                                               |
| CcrSwift_gp323 | + | aagaaagacGAGGacGAGGacg  | atg | gagg   | 3  | hypothetical conserved protein      |                                                                                                               |
| CcrSwift_gp324 | + | aaacgcaccGAGcttagatc    | atg | gag    | 9  | Terminase small subunit             | HPred vs pdb70_18Aug12, hit 3zqp_A, prob 90.4% E=0.15; position relative to terminase large subunit, see text |
| CcrSwift_gp325 | + | tcgcgctgaccctagaacgccc  | gtg | None   | 0  | Terminase large subunit             | IPR004921, IPR007868, IPR006141, IPR003587, IPR006517, SSF51294, G3DSA:2.170.16.10                            |

Table S5. Predicted proteins, gene starts and annotations of *C. crescentus* phage CcrRogue. Upstream sequence is the 25 bp of DNA sequence upstream of the start codon, with the predicted Shine-Dalgarno motif capitalized. S-D is the Shine-Dalgarno motif associated with the gene start, and spacing is the interval (in bp) between the S-D and start codon. Evidence includes detected conserved domains or motifs, BlastP and HHpred hits, and experimental or other evidence as detailed in the text.

| Protein name   | Strand | Upstream Sequence      | Start Codon | S-D    | spacing | Predicted product                                 | Evidence                                                                                 |
|----------------|--------|------------------------|-------------|--------|---------|---------------------------------------------------|------------------------------------------------------------------------------------------|
| CcrRogue_gp001 | +      | tggcaaatcaAGGAGcggcg   | atg         | aggag  | 6       | hypothetical conserved protein                    |                                                                                          |
| CcrRogue_gp002 | +      | cgaaatcaaaAGGctatcgcc  | atg         | agg    | 9       | hypothetical conserved protein                    |                                                                                          |
| CcrRogue_gp003 | +      | atcccgctaccGGAcaacccc  | atg         | gga    | 7       | hypothetical conserved protein                    |                                                                                          |
| CcrRogue_gp004 | -      | cggcccttGGAGaacgcccc   | atg         | ggag   | 8       | hypothetical conserved protein                    |                                                                                          |
| CcrRogue_gp005 | +      | tttgacattgtGAGGcaacccc | atg         | gagg   | 6       | hypothetical conserved protein                    |                                                                                          |
| CcrRogue_gp006 | +      | aattccggcctcttggcctt   | atg         | None   | 0       | hypothetical novel protein                        |                                                                                          |
| CcrRogue_gp007 | +      | aaacccctGGAGccctgcccc  | atg         | ggagg  | 9       | hypothetical conserved protein                    |                                                                                          |
| CcrRogue_gp008 | +      | cgaacggcccaAGGTgaaagc  | gtg         | aggt   | 6       | hypothetical conserved protein                    |                                                                                          |
| CcrRogue_gp009 | +      | cccgcccttGGAGttctcccc  | atg         | ggag   | 8       | hypothetical conserved protein                    |                                                                                          |
| CcrRogue_gp010 | +      | tccgtgaaAGGAatccatacc  | gtg         | agga   | 9       | hypothetical conserved protein                    |                                                                                          |
| CcrRogue_gp011 | +      | cctcaacctGGAGattttcccc | atg         | ggag   | 9       | hypothetical conserved protein                    |                                                                                          |
| CcrRogue_gp012 | +      | gcccgaactcGGAaccaagccc | atg         | gga    | 9       | hypothetical conserved protein                    |                                                                                          |
| CcrRogue_gp013 | +      | cccccgcaAGGAtcgcccagc  | atg         | agga   | 9       | hypothetical conserved protein                    |                                                                                          |
| CcrRogue_gp014 | +      | gaacccaAGGAccccggcccc  | atg         | agga   | 10      | hypothetical conserved protein                    |                                                                                          |
| CcrRogue_gp015 | +      | ccctgcgcaAGGTgcctaac   | atg         | aggt   | 8       | hypothetical conserved protein                    |                                                                                          |
| CcrRogue_gp016 | +      | caccgcaAGGAGccttgagc   | atg         | agga   | 9       | hypothetical conserved protein                    |                                                                                          |
| CcrRogue_gp017 | +      | tcctctctGGAGcctacc     | atg         | ggag   | 8       | hypothetical conserved protein                    |                                                                                          |
| CcrRogue_gp018 | +      | tcctctctGGAGcctacc     | atg         | gga    | 9       | hypothetical conserved protein                    |                                                                                          |
| CcrRogue_gp019 | +      | gggtcgcaAGGAGacacccac  | atg         | aggag  | 8       | hypothetical conserved protein                    |                                                                                          |
| CcrRogue_gp020 | +      | aaacgaagcccAGGAGGctcc  | atg         | aggagg | 4       | hypothetical conserved protein                    |                                                                                          |
| CcrRogue_gp021 | +      | cgtcaacggcctgatcgtcacc | atg         | None   | 0       | hypothetical conserved protein                    |                                                                                          |
| CcrRogue_gp022 | +      | cgggcctGGGcaaggtctg    | atg         | gggg   | 9       | hypothetical conserved protein                    |                                                                                          |
| CcrRogue_gp023 | +      | tcaagcctGGAttctcatctg  | atg         | gga    | 10      | putative TAT signal protein                       | PRED-TAT                                                                                 |
| CcrRogue_gp024 | +      | gaagaAGGctctggtcgctg   | atg         | agg    | 13      | putative lipoprotein                              | LipoP                                                                                    |
| CcrRogue_gp025 | +      | tgtcgacacccccggccctg   | atg         | None   | 0       | putative HTH homeodomain DNA binding protein      | IPR009057                                                                                |
| CcrRogue_gp026 | +      | cAGGAagctggaagccaaagc  | atg         | agga   | 16      | hypothetical novel protein                        |                                                                                          |
| CcrRogue_gp027 | +      | aaagccGGAccagaaaatctg  | atg         | gga    | 12      | hypothetical novel protein                        |                                                                                          |
| CcrRogue_gp028 | +      | cctggaaaaccgcGAGccccg  | atg         | gag    | 5       | hypothetical novel protein                        |                                                                                          |
| CcrRogue_gp029 | +      | cgcggcgccgcttggcgcc    | atg         | None   | 0       | hypothetical conserved protein                    |                                                                                          |
| CcrRogue_gp030 | +      | cccgatcGGAGaatcctgacc  | atg         | ggag   | 10      | hypothetical conserved protein                    |                                                                                          |
| CcrRogue_gp031 | +      | agaccatcttGAGGgacact   | atg         | gagg   | 6       | hypothetical conserved protein                    |                                                                                          |
| CcrRogue_gp032 | +      | gccgcccAAGGAtgcccgcg   | gtg         | agga   | 9       | hypothetical conserved protein                    |                                                                                          |
| CcrRogue_gp033 | +      | ggtccgcaAGGAGcctcta    | ttg         | aggag  | 8       | hypothetical conserved protein                    |                                                                                          |
| CcrRogue_gp034 | +      | actacaacaAGGcctgatccc  | atg         | agg    | 9       | hypothetical conserved protein                    |                                                                                          |
| CcrRogue_gp035 | +      | cgcgaaagccGGGttaaacct  | gtg         | gggg   | 7       | hypothetical novel protein                        |                                                                                          |
| CcrRogue_gp036 | +      | gaccggatgcGGAGggcgctc  | gtg         | ggagg  | 5       | putative HTH DNA binding protein                  | IPR001387, IPR010982, G3DSA:1.10.260.40                                                  |
| CcrRogue_gp037 | +      | ccctgagttcaAGGcctgac   | atg         | agg    | 7       | hypothetical novel protein                        |                                                                                          |
| CcrRogue_gp038 | +      | caagctGGAGaaggttgagcc  | gtg         | ggag   | 11      | hypothetical novel protein                        |                                                                                          |
| CcrRogue_gp039 | +      | gcagcagccgcAGGAagagtc  | atg         | agga   | 6       | hypothetical conserved protein                    |                                                                                          |
| CcrRogue_gp040 | +      | caacggcgatcgttgaatct   | gtg         | None   | 0       | hypothetical novel protein                        |                                                                                          |
| CcrRogue_gp041 | +      | gcgcaaacgccctGGGGttct  | gtg         | gggg   | 4       | hypothetical novel protein                        |                                                                                          |
| CcrRogue_gp042 | +      | ctatcgcttGAGGgacgcc    | gtg         | gagg   | 8       | hypothetical conserved protein                    |                                                                                          |
| CcrRogue_gp043 | -      | cgggtatctcaAGGAGtagcc  | atg         | aggag  | 5       | hypothetical conserved protein                    |                                                                                          |
| CcrRogue_gp044 | -      | tgcatttccGGGgtgtcgtc   | atg         | gggg   | 7       | putative transglutaminase-like cysteine peptidase | IPR010319                                                                                |
| CcrRogue_gp045 | -      | ttgacgtgGGAagcccgcgg   | atg         | gga    | 10      | hypothetical novel protein                        |                                                                                          |
| CcrRogue_gp046 | +      | gcgacctcgcAGGcctctat   | ctg         | agg    | 8       | putative portal protein                           | HHpred vs pdb70_18Aug12, hit 2jes_A, prob 99.9% E=1.7E-23; positional evidence, see text |
| CcrRogue_gp047 | +      | atccagcaagcctGAGttcag  | atg         | gag    | 5       | hypothetical conserved protein                    |                                                                                          |
| CcrRogue_gp048 | +      | gcgcccgaagaagcggcctg   | atg         | None   | 0       | hypothetical conserved protein                    |                                                                                          |
| CcrRogue_gp049 | +      | gttaaccacAGGgctttttcc  | atg         | gagg   | 8       | hypothetical conserved protein                    |                                                                                          |
| CcrRogue_gp050 | +      | caeccttccaaAGGcctcgg   | atg         | gagg   | 6       | hypothetical conserved protein                    |                                                                                          |
| CcrRogue_gp051 | +      | cgcgtccGGGgacctgaccc   | atg         | gggg   | 9       | hypothetical novel protein                        |                                                                                          |
| CcrRogue_gp052 | +      | caacctcgctcGAGGcctgatc | atg         | gagg   | 7       | hypothetical conserved protein                    |                                                                                          |
| CcrRogue_gp053 | +      | gatcgccgctcctcgaagac   | gtg         | None   | 0       | hypothetical conserved protein                    |                                                                                          |
| CcrRogue_gp054 | +      | catctacgaaagcaccgccga  | atg         | None   | 0       | hypothetical conserved protein                    |                                                                                          |
| CcrRogue_gp055 | +      | gctcaagttccGGAGacgcc   | gtg         | ggag   | 5       | hypothetical conserved protein                    |                                                                                          |
| CcrRogue_gp056 | +      | gccgatcccGGAagcggcctt  | gtg         | gga    | 9       | hypothetical conserved protein                    |                                                                                          |
| CcrRogue_gp057 | +      | ttaaccaagcggcctctccg   | atg         | None   | 0       | hypothetical conserved protein                    |                                                                                          |
| CcrRogue_gp058 | +      | accagatacaAGGctagacc   | atg         | gggg   | 6       | putative HD-domain/PDEase-like protein            | SSF109604                                                                                |
| CcrRogue_gp059 | +      | gaacgatacGAGaacatgccc  | atg         | gag    | 9       | hypothetical conserved protein                    |                                                                                          |
| CcrRogue_gp060 | +      | gctatctcggaccgctgaccc  | atg         | None   | 0       | hypothetical conserved protein                    |                                                                                          |
| CcrRogue_gp061 | +      | catgacctAGGAagccgcctg  | atg         | agga   | 10      | putative HNH homing endonuclease                  | IPR001982, G3DSA:3.10.28.10, SSF55608                                                    |
| CcrRogue_gp062 | +      | aatgaacaagaAGGcctata   | atg         | gagg   | 6       | putative DHH phosphoesterase protein              | SSF64182                                                                                 |
| CcrRogue_gp063 | +      | ccccgcccgggcaagacc     | atg         | None   | 0       | hypothetical novel protein                        |                                                                                          |
| CcrRogue_gp064 | +      | agtttgagcAGGAGTcgccg   | gtg         | aggagg | 5       | hypothetical conserved protein                    |                                                                                          |
| CcrRogue_gp065 | +      | ttccagcacatctGAGTccc   | atg         | gagg   | 4       | hypothetical conserved protein                    |                                                                                          |
| CcrRogue_gp066 | +      | tacGAGcctaccatcacatc   | atg         | gagg   | 14      | hypothetical conserved protein                    |                                                                                          |
| CcrRogue_gp067 | +      | gtccatcaAGGcctcctctctg | atg         | agg    | 10      | hypothetical conserved protein                    |                                                                                          |
| CcrRogue_gp068 | +      | aaagccccggcaactaccgg   | atg         | None   | 0       | putative HNH endonuclease                         | IPR002711                                                                                |
| CcrRogue_gp069 | +      | tccgtgaaagAGGagaaacct  | atg         | gag    | 6       | hypothetical conserved protein                    |                                                                                          |
| CcrRogue_gp070 | +      | aaacccaaaAGGAGcaagcca  | atg         | aggag  | 7       | putative major capsid protein                     | experimental evidence, see text                                                          |
| CcrRogue_gp071 | +      | atctaaagcAGGAactccccag | atg         | agga   | 9       | putative minor capsid protein                     | experimental evidence, see text                                                          |
| CcrRogue_gp072 | +      | ccccgaaacGGAttttcccc   | atg         | gga    | 9       | hypothetical conserved protein                    |                                                                                          |
| CcrRogue_gp073 | +      | cgaAGGcggcgccctaaagcc  | atg         | agg    | 14      | hypothetical conserved protein                    |                                                                                          |

|                |   |                         |     |        |    |                                                                   |                                                                                                                                  |
|----------------|---|-------------------------|-----|--------|----|-------------------------------------------------------------------|----------------------------------------------------------------------------------------------------------------------------------|
| CcrRogue_gp074 | + | atcaccacAGGTgaactaaccc  | gtg | aggt   | 10 | hypothetical conserved protein                                    |                                                                                                                                  |
| CcrRogue_gp075 | + | caactgctcagccctaaccc    | atg | None   | 0  | hypothetical conserved protein                                    |                                                                                                                                  |
| CcrRogue_gp076 | + | tcacgaaactaaGGGGggggcc  | atg | gggg   | 5  | hypothetical conserved protein                                    |                                                                                                                                  |
| CcrRogue_gp077 | + | taaccctcAGGAGccccaaccc  | atg | aggag  | 8  | hypothetical conserved protein                                    |                                                                                                                                  |
| CcrRogue_gp078 | + | tcccgtaaaAGGTctccccg    | ttg | aggt   | 8  | putative lectin-like domain protein                               |                                                                                                                                  |
| CcrRogue_gp079 | + | gcgacccctGGAGacctaaagg  | atg | ggag   | 9  | hypothetical conserved protein                                    | IPR013320, IPR008985                                                                                                             |
| CcrRogue_gp080 | + | tcccggtccGGAGcccgccgc   | gtg | gagg   | 8  | hypothetical conserved protein                                    |                                                                                                                                  |
| CcrRogue_gp081 | + | tctGGAGtttcgagcgccacc   | atg | ggag   | 14 | hypothetical conserved protein                                    |                                                                                                                                  |
| CcrRogue_gp082 | + | gcctgcatacGAGGctacc     | atg | gagg   | 5  | hypothetical conserved protein                                    |                                                                                                                                  |
| CcrRogue_gp083 | + | ggggggccagtcGAGgattgtc  | atg | gag    | 5  | hypothetical conserved protein                                    |                                                                                                                                  |
| CcrRogue_gp084 | + | aagctggatGAGcttggcgca   | atg | gag    | 9  | hypothetical conserved protein                                    |                                                                                                                                  |
| CcrRogue_gp085 | + | tgttccctggGGAGttctctag  | atg | ggag   | 8  | hypothetical conserved protein                                    |                                                                                                                                  |
| CcrRogue_gp086 | + | cgccatcccagagGGAGcgac   | gtg | ggag   | 4  | putative PhoH-like protein                                        | IPR003714, SSF52540, G3DSA:3.40.50.300                                                                                           |
| CcrRogue_gp087 | + | gtgacaaaagcgtAGAGcacc   | atg | gag    | 4  | hypothetical conserved protein                                    |                                                                                                                                  |
| CcrRogue_gp088 | + | caagaagatcatccggcacta   | atg | None   | 0  | hypothetical conserved protein                                    |                                                                                                                                  |
| CcrRogue_gp089 | + | caectcccGGAGtcgtgacgc   | gtg | gga    | 10 | hypothetical conserved protein                                    |                                                                                                                                  |
| CcrRogue_gp090 | + | ttctggtcggGGAGGactag    | atg | ggagg  | 5  | hypothetical conserved protein                                    |                                                                                                                                  |
| CcrRogue_gp091 | + | ccctGGAttggtgacctgca    | atg | gga    | 14 | putative major tail tube protein                                  |                                                                                                                                  |
| CcrRogue_gp092 | + | cgatacatGGAGctccccgaaa  | atg | gga    | 10 | putative pre-tape measure chaperone protein                       | experimental evidence, see text                                                                                                  |
| CcrRogue_gp093 | + | cgatacatGGAGctccccgaaa  | atg | gga    | 10 | putative pre-tape measure chaperone protein, frameshifted version | HHpred vs pdb70_18Aug12, hit 2ob9_A, prob 86.0% E=2.3; positional evidence, see text                                             |
| CcrRogue_gp094 | + | acGGGGcccgccgcataggatca | atg | gggg   | 15 | putative tail tape measure protein                                | positional evidence, see text; slippery sequence AAAAAAC                                                                         |
| CcrRogue_gp095 | + | atccagGGAGctccctctcgc   | atg | gga    | 12 | hypothetical conserved protein                                    | IPR007921, IPR013491, IPR013423; experimental evidence, see text                                                                 |
| CcrRogue_gp096 | + | ctatAGGGAGatcatctcc     | gtg | aggag  | 11 | putative tail protein                                             | IPR011740                                                                                                                        |
| CcrRogue_gp097 | + | ccccaaaccgcccGGAGcagga  | atg | ggag   | 5  | putative NlpC/P60 family cell wall peptidase                      | IPR019228, IPR018964, IPR011928; experimental evidence, see text                                                                 |
| CcrRogue_gp098 | + | ccccggcttgAGGActaagc    | atg | agga   | 6  | putative tail protein                                             | IPR000064, SSF54001, G3DSA:3.90.1720.10                                                                                          |
| CcrRogue_gp099 | + | tgtcataaaaagcgtggaacc   | atg | None   | 0  | hypothetical conserved protein                                    | IPR007110; experimental evidence, see text                                                                                       |
| CcrRogue_gp100 | + | octcaAGGcgctcatctcgca   | atg | agg    | 13 | putative tail protein                                             | IPR000421, IPR008979, G3DSA:2.60.120.260; experimental evidence, see text                                                        |
| CcrRogue_gp101 | + | agcaactcccGGAGttccccac  | atg | gga    | 9  | putative endolysin                                                | IPR002196, SSF53955, G3DSA:1.10.530.40                                                                                           |
| CcrRogue_gp102 | + | aagccttcaAGGctgctgac    | atg | agg    | 9  | putative inner membrane spanin component                          | N-terminal TMD, outer membrane spanin component embedded in +1 frame, see text                                                   |
| CcrRogue_gp103 | + | agtaaccaGAGGttatccaca   | atg | gagg   | 8  | putative outer membrane spanin component                          | lipoprotein embedded in inner membrane spanin component, see text                                                                |
| CcrRogue_gp104 | + | caagtcaaaGGGgaagaagtc   | atg | gggg   | 8  | putative holin protein                                            | predicted 4 TMDs, see text                                                                                                       |
| CcrRogue_gp105 | + | cgctatacAGGAGtagggagc   | atg | ggag   | 8  | hypothetical novel protein                                        |                                                                                                                                  |
| CcrRogue_gp106 | + | caacggagcAGGAGaacgat    | atg | aggag  | 6  | putative HTH domain DNA-binding protein                           | IPR001387, IPR010982, IPR010982, G3DSA:1.10.260.40                                                                               |
| CcrRogue_gp107 | - | ttaaaccaGAGGccccgaaata  | atg | gagg   | 10 | putative DUTP pyrophosphatase                                     | IPR0008181, IPR0008180, SSF51283, PTHR11241, G3DSA:2.70.40.10                                                                    |
| CcrRogue_gp108 | - | tccttccGAGacctcccaaac   | atg | gag    | 11 | putative ribonucleoside diphosphate reductase beta subunit        | IPR012348, IPR012335, IPR000358, IPR002109, IPR009078, IPR012336, IPR011767                                                      |
| CcrRogue_gp109 | - | ttgtcgcGAGaaacGAGacc    | atg | gag    | 5  | putative ribonucleoside diphosphate reductase alpha subunit       | IPR006141, IPR003587, IPR000788, IPR013509, IPR008926, SSF51294, SSF51998, G3DSA:2.170.16.10, G3DSA:3.20.70.20                   |
| CcrRogue_gp110 | - | gcatacgttGGGtccaaggccg  | ttg | gggg   | 9  | hypothetical conserved protein                                    |                                                                                                                                  |
| CcrRogue_gp111 | - | tcctcatcgcagcAGGAatccc  | atg | agga   | 5  | hypothetical conserved protein                                    |                                                                                                                                  |
| CcrRogue_gp112 | - | cgacatccccGGAGcccccc    | atg | ggag   | 6  | hypothetical conserved protein                                    |                                                                                                                                  |
| CcrRogue_gp113 | - | tcgtcttcgacaAGGAGctgac  | atg | agga   | 5  | putative thymidylate synthase                                     | IPR003669                                                                                                                        |
| CcrRogue_gp114 | - | gtccttcgctAGGAGcccccg   | atg | aggag  | 6  | putative dNMP kinase                                              | HHpred vs pdb70_18Aug12, hit 2grj_A, prob 99.9% E=7.3E-24; SSF52540, G3DSA:3.40.50.300                                           |
| CcrRogue_gp115 | - | aagatcaAGGAcggccagcct   | ctg | agga   | 10 | putative RecD-like helicase                                       | HHpred vs pdb70_18Aug12, hit 3e1s_A, prob 100% E=4E-47; SSF52540, G3DSA:3.40.50.300                                              |
| CcrRogue_gp116 | - | cagaaaaatAGGcatcagcact  | atg | agg    | 10 | hypothetical conserved protein                                    |                                                                                                                                  |
| CcrRogue_gp117 | - | tttatgacggcggtgcgctag   | atg | None   | 0  | hypothetical conserved protein                                    |                                                                                                                                  |
| CcrRogue_gp118 | - | ctcccgaacGAGatcggcccc   | atg | gag    | 9  | putative exoribonuclease, Pol III-like                            | IPR006055, IPR013520, IPR012337, G3DSA:3.30.420.10                                                                               |
| CcrRogue_gp119 | - | caactggggccGAGacgcaact  | atg | gag    | 8  | hypothetical conserved protein                                    |                                                                                                                                  |
| CcrRogue_gp120 | - | accagattctcaAGGTgctcc   | atg | aggt   | 5  | putative Pol I DNA polymerase, T7-like                            | IPR001098, IPR012337, SSF56672, PTHR10133, G3DSA:1.10.150.20, G3DSA:1.20.1060.10, G3DSA:3.30.420.10, G3DSA:3.30.70.370; see text |
| CcrRogue_gp121 | - | gacatcggttaaacataacctc  | atg | None   | 0  | putative DNA cytosine methyltransferase                           | IPR001525, IPR018117, SSF53335, PTHR10629:SF11, G3DSA:3.40.50.150, G3DSA:3.90.120.10                                             |
| CcrRogue_gp122 | - | ggcaactgtaacGAGGccccg   | atg | gagg   | 5  | hypothetical conserved protein                                    |                                                                                                                                  |
| CcrRogue_gp123 | - | gcgcccacaaacGGAGctctct  | atg | ggag   | 7  | putative TS A1-like protein                                       | blastp to TS A1 (AAU05157), E=7.75E-85, 30.8% Identity; HHpred vs pdb70_18Aug12, hit 1qgp_A, prob 96.5% E=0.0028                 |
| CcrRogue_gp124 | - | tcgggctatgccAGGAacccc   | ttg | agga   | 5  | putative DNA methylase                                            | IPR002052, SSF53335, G3DSA:3.40.50.150                                                                                           |
| CcrRogue_gp125 | - | tagggcgGGAGctgcaaatct   | ctg | gga    | 10 | hypothetical novel protein                                        |                                                                                                                                  |
| CcrRogue_gp126 | + | gactttcAGGAGatttgtgtc   | gtg | aggag  | 9  | putative cadherin-like domain protein                             | IPR002126, IPR006626, IPR015919 PTHR10596                                                                                        |
| CcrRogue_gp127 | - | tttGAGtaagtgtccccacccc  | atg | gag    | 15 | hypothetical conserved protein                                    |                                                                                                                                  |
| CcrRogue_gp128 | - | catcgcaAGGTcatggacac    | gtg | aggt   | 9  | hypothetical conserved protein                                    |                                                                                                                                  |
| CcrRogue_gp129 | - | gcggttaaacacgtgaggaccc  | atg | None   | 0  | putative DNA helicase                                             | IPR014001, IPR001650, IPR000330, IPR014021, SSF52540, PTHR10799, G3DSA:3.40.50.300                                               |
| CcrRogue_gp130 | + | ccggtcaacaAGGAGaactacc  | atg | aggag  | 7  | hypothetical conserved protein                                    |                                                                                                                                  |
| CcrRogue_gp131 | + | ggaaatatAGGAGGcgcgctg   | atg | aggagg | 7  | hypothetical conserved protein                                    |                                                                                                                                  |
| CcrRogue_gp132 | - | agaagtacaagaagtgagcca   | atg | None   | 0  | hypothetical conserved protein                                    |                                                                                                                                  |
| CcrRogue_gp133 | - | tgaagacctcggggcgagcg    | ctg | None   | 0  | hypothetical conserved protein                                    |                                                                                                                                  |
| CcrRogue_gp134 | - | ccacttcagaAGGAGctcccc   | atg | agga   | 7  | hypothetical conserved protein                                    |                                                                                                                                  |
| CcrRogue_gp135 | - | gcgcgagcaAGGAGctctccc   | atg | aggag  | 6  | Putative rllb-like protein                                        | PD130832                                                                                                                         |
| CcrRogue_gp136 | - | cactctctctGGAGttgata    | atg | ggag   | 6  | putative rlla-like protein                                        | IPR003594                                                                                                                        |
| CcrRogue_gp137 | + | actccaagAGGAGagtggttag  | gtg | aggag  | 9  | hypothetical conserved protein                                    |                                                                                                                                  |
| CcrRogue_gp138 | + | tcaatggtacggAGGAGcacc   | atg | agga   | 4  | hypothetical conserved protein                                    |                                                                                                                                  |
| CcrRogue_gp139 | + | ctccagcggggcgctgctcaa   | ttg | None   | 0  | hypothetical conserved protein                                    |                                                                                                                                  |
| CcrRogue_gp140 | + | acgacaacgaAGGAGGcttcc   | atg | aggagg | 5  | putative tyrosine recombinase                                     | IPR013762, IPR002104, IPR011010                                                                                                  |
| CcrRogue_gp141 | + | gtcctgcgataGGGgggggg    | atg | gggg   | 5  | hypothetical conserved protein                                    |                                                                                                                                  |
| CcrRogue_gp142 | + | gcctgaagtaAGGAGtacagc   | ttg | aggag  | 6  | hypothetical conserved protein                                    |                                                                                                                                  |
| CcrRogue_gp143 | + | ggggcggtggtcgcgccctc    | atg | None   | 0  | hypothetical novel protein                                        |                                                                                                                                  |
| CcrRogue_gp144 | + | acccccctcccgacAGGcttc   | atg | agg    | 4  | hypothetical conserved protein                                    |                                                                                                                                  |
| CcrRogue_gp145 | + | ttcccgcctctGGAGtttctc   | atg | ggag   | 6  | hypothetical novel protein                                        |                                                                                                                                  |
| CcrRogue_gp146 | + | cttgtacggtaagGGAaaccc   | atg | gga    | 5  | hypothetical conserved protein                                    |                                                                                                                                  |
| CcrRogue_gp147 | + | ccgagacGGAGtattcatgag   | atg | ggag   | 10 | putative HTH domain protein                                       | IPR001387, G3DSA:1.10.260.40                                                                                                     |
| CcrRogue_gp148 | + | ttctacgcctgaAGGAcccc    | atg | agga   | 4  | putative tRNA amidotransferase domain protein                     | IPR019004, IPR003789                                                                                                             |
| CcrRogue_gp149 | - | ccaagcaagAGGAcaccgacg   | atg | agga   | 8  | hypothetical novel protein                                        |                                                                                                                                  |
| CcrRogue_gp150 | - | gttgatcgaGGGaaattgag    | atg | gggg   | 8  | putative DNA ligase                                               | IPR012340, IPR016027, SSF56091, G3DSA:3.30.470.30                                                                                |

|                |   |                        |     |         |    |                                               |                                                               |
|----------------|---|------------------------|-----|---------|----|-----------------------------------------------|---------------------------------------------------------------|
| CcrRogue_gp151 | - | tectcaaccGGACatcttcg   | atg | gga     | 8  | hypothetical conserved protein                |                                                               |
| CcrRogue_gp152 | - | ggggcgctagcgcgcgctg    | atg | None    | 0  | hypothetical conserved protein                |                                                               |
| CcrRogue_gp153 | - | gtctcGGGGcaaatgtcagga  | atg | gggg    | 12 | DUF1643 protein                               | IPR012441                                                     |
| CcrRogue_gp154 | - | gcacgcctcaagccgctctg   | atg | None    | 0  | hypothetical conserved protein                |                                                               |
| CcrRogue_gp155 | - | catcagtAGGAGtttggaagt  | atg | aggag   | 9  | hypothetical conserved protein                |                                                               |
| CcrRogue_gp156 | - | aacaggaaTAGGAGcagtcctc | atg | aggag   | 7  | hypothetical conserved protein                |                                                               |
| CcrRogue_gp157 | - | cgaccgccgtgaAGGTctgcca | atg | aggt    | 6  | hypothetical conserved protein                |                                                               |
| CcrRogue_gp158 | - | cttcgtcgacGAGccgcctg   | atg | gag     | 8  | hypothetical conserved protein                |                                                               |
| CcrRogue_gp159 | - | caacgcttaaaGGGaaacctc  | atg | gggg    | 6  | putative nicotinate phosphoribosyltransferase | IPR015977, IPR002638, PTHR11098                               |
| CcrRogue_gp160 | - | cccgcccttAGGAGGTgatg   | gtg | aggaggt | 4  | putative NUDIX hydrolase domain protein       | IPR014729, IPR000086, IPR015797, SSF52374, P551462, PTHR22769 |
| CcrRogue_gp161 | - | aaagcGGAGGaaatcgata    | gtg | ggagg   | 10 | hypothetical conserved protein                |                                                               |
| CcrRogue_gp162 | - | ttgcacgcctgGAGccctgtg  | atg | gga     | 7  | putative peptidyl-tRNA hydrolase              | IPR002833, SSF102462, PTHR12649, G3DSA:3.40.1490.10           |
| CcrRogue_gp163 | - | ccgacgcccGAGGcccaatcg  | gtg | gagg    | 8  | hypothetical conserved protein                |                                                               |
| CcrRogue_gp164 | - | agcaagtacaactcgtctgccc | gtg | None    | 0  | hypothetical conserved protein                |                                                               |
| CcrRogue_gp165 | - | acaacgcccGGAGcccttttc  | atg | ggagg   | 8  | hypothetical conserved protein                |                                                               |
| CcrRogue_gp166 | - | cctgatccccGAGaaaactgc  | atg | gag     | 8  | putative HD-domain/PDEase-like protein        | SSF109604                                                     |
| CcrRogue_gp167 | - | cgaaattctGAGGgtcgctg   | atg | gagg    | 8  | hypothetical conserved protein                |                                                               |
| CcrRogue_gp168 | - | acgcccaagaAGGAttgatccc | atg | agga    | 8  | putative DNA-binding domain protein           | IPR016177, SSF54060                                           |
| CcrRogue_gp169 | - | cctccaagaagtAGGTccgccc | atg | aggt    | 5  | hypothetical conserved protein                |                                                               |
| CcrRogue_gp170 | - | gctcgaaaAGGAaccgacctg  | atg | agga    | 9  | hypothetical conserved protein                |                                                               |
| CcrRogue_gp171 | - | tcgtcaacaaGGGtccaagc   | atg | gggg    | 7  | hypothetical conserved protein                |                                                               |
| CcrRogue_gp172 | - | caagcAGGcgggcgctgtgct  | ttg | agg     | 13 | hypothetical conserved protein                |                                                               |
| CcrRogue_gp173 | - | cctgtccaagtGGAccaaatc  | gtg | gga     | 7  | hypothetical conserved protein                |                                                               |
| CcrRogue_gp174 | - | ctctcgctgaAGGctagtctg  | atg | agg     | 8  | hypothetical conserved protein                |                                                               |
| CcrRogue_gp175 | - | gacaacgcgagcAGGAgcac   | atg | agga    | 4  | putative RtcB-like protein                    | IPR001233                                                     |
| CcrRogue_gp176 | - | cgacgatgctGGAGGacacc   | ctg | ggagg   | 5  | hypothetical novel protein                    |                                                               |
| CcrRogue_gp177 | - | aaacaagacAGGAGtaaccccc | ttg | aggag   | 7  | putative band 7 lipoprotein                   | IPR001107                                                     |
| CcrRogue_gp178 | - | cattctgaaAGGTcccacctc  | gtg | aggt    | 8  | hypothetical conserved protein                |                                                               |
| CcrRogue_gp179 | - | gcagcGGGGgctcgcggctg   | atg | gggg    | 11 | hypothetical conserved protein                |                                                               |
| CcrRogue_gp180 | - | acgacaacaAGGAGaccgat   | ttg | aggag   | 7  | hypothetical conserved protein                |                                                               |
| CcrRogue_gp181 | - | gttcggctggtAGGAGGacccc | atg | aggaggg | 4  | hypothetical conserved protein                |                                                               |
| CcrRogue_gp182 | - | acctgctgatGGAGaccgccc  | gtg | ggag    | 7  | hypothetical conserved protein                |                                                               |
| CcrRogue_gp183 | - | ccgccgagaAGGTcgaggctg  | atg | aggt    | 8  | hypothetical novel protein                    |                                                               |
| CcrRogue_gp184 | - | ggaaGAGGccgagcaagctg   | atg | gagg    | 13 | hypothetical novel protein                    |                                                               |
| CcrRogue_gp185 | - | tcctagccgaaaAGGgtcgccc | atg | agg     | 6  | hypothetical conserved protein                |                                                               |
| CcrRogue_gp186 | - | cgctcctcgcacgatcacgac  | atg | None    | 0  | hypothetical conserved protein                |                                                               |
| CcrRogue_gp187 | - | cacgatagaaAGGAGcccaag  | atg | aggag   | 5  | hypothetical novel protein                    |                                                               |
| CcrRogue_gp188 | - | cggtggcgcgcaacgcgttcc  | atg | None    | 0  | hypothetical conserved protein                |                                                               |
| CcrRogue_gp189 | - | cctgggcttGAGGaaacacct  | gtg | ggag    | 8  | hypothetical conserved protein                |                                                               |
| CcrRogue_gp190 | - | actggcgaAGGTgtcgccctg  | atg | aggt    | 9  | hypothetical conserved protein                |                                                               |
| CcrRogue_gp191 | - | caacgacagAGGAGacctctc  | ttg | aggag   | 7  | hypothetical conserved protein                |                                                               |
| CcrRogue_gp192 | - | caatcgtccgaGGGGcaagaa  | atg | gggg    | 6  | hypothetical conserved protein                |                                                               |
| CcrRogue_gp193 | - | gacgacaactcGGAGaccgcg  | atg | ggag    | 6  | putative winged-helix HTH DNA binding protein | IPR011991                                                     |
| CcrRogue_gp194 | - | catgaaactcgtcgtcggggga | atg | None    | 0  | hypothetical novel protein                    |                                                               |
| CcrRogue_gp195 | - | cgacggcGGAGcctacatcct  | atg | ggag    | 10 | hypothetical novel protein                    |                                                               |
| CcrRogue_gp196 | - | gacctcggcgtggtccgctcg  | atg | None    | 0  | hypothetical novel protein                    |                                                               |
| CcrRogue_gp197 | - | acgacaacgaAGGAGGccccc  | gtg | aggagg  | 5  | hypothetical novel protein                    |                                                               |
| CcrRogue_gp198 | - | ggacagctcgtGGGcactgc   | atg | gggg    | 6  | hypothetical conserved protein                |                                                               |
| CcrRogue_gp199 | - | caacggtGAGaagtctctctg  | atg | gag     | 11 | hypothetical novel protein                    |                                                               |
| CcrRogue_gp200 | - | ggaaagtcaaAGTccgactcg  | atg | aggt    | 7  | hypothetical conserved protein                |                                                               |
| CcrRogue_gp201 | - | tcaagcggGAGcctgaaactcg | atg | gga     | 11 | hypothetical conserved protein                |                                                               |
| CcrRogue_gp202 | - | cgtgaccacaGAGGccctg    | atg | gagg    | 5  | hypothetical conserved protein                |                                                               |
| CcrRogue_gp203 | - | tGGAGtgaagtccagatcgcg  | gtg | ggag    | 16 | putative acyl carrier protein                 | IPR009081, IPR006163, PTHR20863                               |
| CcrRogue_gp204 | - | tcgagaacggcGAGGaccgct  | atg | agga    | 5  | putative HNH endonuclease                     | IPR002711                                                     |
| CcrRogue_gp205 | - | cgctcctactAGGAGaccccc  | atg | aggag   | 5  | hypothetical conserved protein                |                                                               |
| CcrRogue_gp206 | - | cgtaacctGGGtatcagggccg | atg | gggg    | 10 | hypothetical conserved protein                |                                                               |
| CcrRogue_gp207 | - | cgggGAGaagctgaagtgagc  | atg | ggag    | 14 | hypothetical conserved protein                |                                                               |
| CcrRogue_gp208 | - | ccgtgcctcGGAGaagccctc  | ttg | ggag    | 8  | hypothetical conserved protein                |                                                               |
| CcrRogue_gp209 | - | ccgcttcGAGGAGatcaacggc | ttg | aggag   | 8  | hypothetical conserved protein                |                                                               |
| CcrRogue_gp210 | - | cgacgacaacggaAGGAcccg  | atg | agga    | 4  | hypothetical conserved protein                |                                                               |
| CcrRogue_gp211 | - | tttcgccaGGGGaccgcccac  | gtg | gggg    | 7  | hypothetical conserved protein                |                                                               |
| CcrRogue_gp212 | - | cttcgaaactagGAGGgctc   | atg | ggagg   | 4  | hypothetical conserved protein                |                                                               |
| CcrRogue_gp213 | - | gcgcccggcgaAGGccactg   | atg | agg     | 7  | hypothetical conserved protein                |                                                               |
| CcrRogue_gp214 | - | acgacaaccaaAGGAGccccc  | atg | aggagg  | 5  | hypothetical conserved protein                |                                                               |
| CcrRogue_gp215 | - | atacgtGAGGagcaagcgccg  | gtg | ggag    | 11 | hypothetical conserved protein                |                                                               |
| CcrRogue_gp216 | - | actgcgGAGtgaactgacc    | atg | ggag    | 11 | hypothetical conserved protein                | SSF56784                                                      |
| CcrRogue_gp217 | - | cgcccatttccGGAGtagac   | atg | ggag    | 5  | hypothetical novel protein                    |                                                               |
| CcrRogue_gp218 | - | atgcaggcctGGGGactag    | gtg | gggg    | 5  | hypothetical conserved protein                |                                                               |
| CcrRogue_gp219 | - | gctgatcaagtcGAGGccctg  | atg | gagg    | 5  | hypothetical conserved protein                |                                                               |
| CcrRogue_gp220 | - | gcctgcctcAGGAtcaacct   | atg | agga    | 6  | hypothetical conserved protein                |                                                               |
| CcrRogue_gp221 | - | gatcgccgggttcgtcgcccg  | gtg | None    | 0  | hypothetical conserved protein                |                                                               |
| CcrRogue_gp222 | - | aaaagaAGGAGaagccgcca   | atg | aggagg  | 9  | putative HTH domain DNA-binding protein       | IPR010982, IPR001387                                          |
| CcrRogue_gp223 | - | aatcgcccAGGgcccgcctg   | atg | agg     | 10 | hypothetical conserved protein                |                                                               |
| CcrRogue_gp224 | - | cgacgacatagAGGAGtcccc  | gtg | aggag   | 5  | hypothetical conserved protein                |                                                               |
| CcrRogue_gp225 | - | ccaaaagaAGGGaccgccc    | ttg | gggg    | 6  | hypothetical conserved protein                |                                                               |
| CcrRogue_gp226 | - | ccgcaagaAGGAccccacggc  | atg | agga    | 9  | hypothetical conserved protein                |                                                               |
| CcrRogue_gp227 | - | cgccaagatcaaGAGGcctg   | atg | gagg    | 5  | putative Pol I DNA polymerase                 | IPR001098, IPR002298                                          |

|                |   |                         |     |        |    |                                               |
|----------------|---|-------------------------|-----|--------|----|-----------------------------------------------|
| CcrRogue_gp228 | - | agaacAGGAGtagcgtacaag   | gtg | aggag  | 11 | putative GcrA-like cell cycle regulator       |
| CcrRogue_gp229 | - | cgccgaaaatcgAGGAGcgtc   | atg | aggag  | 4  | hypothetical conserved protein                |
| CcrRogue_gp230 | + | cgacaaacgaaAGGAGcgtg    | atg | aggagg | 5  | hypothetical conserved protein                |
| CcrRogue_gp231 | + | cgcccgccAGGAcatggccgc   | atg | agga   | 9  | hypothetical conserved protein                |
| CcrRogue_gp232 | + | cgacaagatcAGGaaGAGGt    | ttg | gagg   | 1  | hypothetical conserved protein                |
| CcrRogue_gp233 | + | ttctgccccAGGAGcttctcg   | atg | aggag  | 7  | hypothetical conserved protein                |
| CcrRogue_gp234 | + | cattttcgactAGGAGGgacc   | atg | aggagg | 4  | hypothetical conserved protein                |
| CcrRogue_gp235 | + | catcgtcGAGGcgttcGAGGc   | gtg | gagg   | 1  | hypothetical conserved protein                |
| CcrRogue_gp236 | + | ttctgggaaagcAGGActgac   | gtg | agga   | 5  | hypothetical conserved protein                |
| CcrRogue_gp237 | + | cgacaaacgcaAGGAGcctgctc | ttg | aggag  | 6  | hypothetical conserved protein                |
| CcrRogue_gp238 | + | gagcctGGAGcccggtggcctc  | atg | ggag   | 11 | hypothetical conserved protein                |
| CcrRogue_gp239 | + | catgaaaaagagGGAGGccta   | atg | ggagg  | 4  | hypothetical conserved protein                |
| CcrRogue_gp240 | + | ccccccccAGGAGcccgccgac  | gtg | aggag  | 8  | hypothetical conserved protein                |
| CcrRogue_gp241 | + | tgacctcaagaAGGAaatcca   | atg | agga   | 6  | hypothetical conserved protein                |
| CcrRogue_gp242 | + | gacgacaacAGGAGGccccg    | atg | aggagg | 5  | hypothetical conserved protein                |
| CcrRogue_gp243 | + | cgccggaaatGGAGattcaag   | atg | ggag   | 7  | hypothetical conserved protein                |
| CcrRogue_gp244 | + | cgccctggagcttGAGGcctg   | atg | gagg   | 4  | hypothetical conserved protein                |
| CcrRogue_gp245 | + | acctggagAGGAGaaactgac   | atg | aggag  | 7  | hypothetical conserved protein                |
| CcrRogue_gp246 | + | ggaaagtgcGGAGccgaaagt   | ttg | ggag   | 8  | hypothetical conserved protein                |
| CcrRogue_gp247 | + | caacgccctgGGAGcccgccc   | atg | ggag   | 7  | hypothetical conserved protein                |
| CcrRogue_gp248 | + | cccagaccagcGAGGTcaagcc  | atg | gaggt  | 6  | hypothetical novel protein                    |
| CcrRogue_gp249 | + | acgacaacgaaAGGAGGcttcc  | gtg | aggagg | 5  | hypothetical novel protein                    |
| CcrRogue_gp250 | + | gctctcgtgggccaAGGctctg  | atg | agg    | 4  | hypothetical conserved protein                |
| CcrRogue_gp251 | + | tggcccatcacGAGGctgac    | atg | ggagg  | 5  | hypothetical novel protein                    |
| CcrRogue_gp252 | + | gcaactGGAGGccaagctctg   | atg | ggagg  | 10 | hypothetical conserved protein                |
| CcrRogue_gp253 | + | gatcatcccccgAGGTtctg    | atg | gaggt  | 4  | hypothetical conserved protein                |
| CcrRogue_gp254 | + | gacgacaacaaAGGAGGcccc   | atg | aggagg | 4  | hypothetical conserved protein                |
| CcrRogue_gp255 | + | ctacatcagGGACatcgcccc   | gtg | gga    | 9  | hypothetical conserved protein                |
| CcrRogue_gp256 | + | tcagcgtGGAGGTggctgctg   | atg | ggaggt | 8  | hypothetical conserved protein                |
| CcrRogue_gp257 | + | catggacgcgAGGAaggcctg   | atg | agga   | 7  | hypothetical conserved protein                |
| CcrRogue_gp258 | + | tgtcgcgcgAGGAGcagacc    | ttg | aggag  | 6  | hypothetical conserved protein                |
| CcrRogue_gp259 | + | agccaaaGGGttcGGGGcaaa   | atg | gggg   | 3  | hypothetical conserved protein                |
| CcrRogue_gp260 | + | cttcgtcGAGGcgttccacc    | gtg | gagg   | 10 | hypothetical conserved protein                |
| CcrRogue_gp261 | + | aaacagtcAGGAacaccagcc   | atg | agga   | 9  | putative TAT signal protein                   |
| CcrRogue_gp262 | + | agccaaagAGGccccAGGcctg  | atg | agg    | 4  | hypothetical conserved protein                |
| CcrRogue_gp263 | + | acctccagaAGGAGccccacct  | atg | aggag  | 7  | hypothetical conserved protein                |
| CcrRogue_gp264 | + | agcccgccggGGGcgagta     | atg | gggg   | 6  | hypothetical conserved protein                |
| CcrRogue_gp265 | + | ccagcctgaaagcgttctctgac | atg | None   | 0  | hypothetical conserved protein                |
| CcrRogue_gp266 | + | accgctcgacgggtGGAacgg   | atg | gga    | 4  | putative pleckstrin domain protein            |
| CcrRogue_gp267 | + | tgaggaaagAGGAGcgtcgtg   | atg | aggag  | 8  | putative Ser/Thr protein phosphatase          |
| CcrRogue_gp268 | + | gctcaagatcaaggtgtgacg   | atg | None   | 0  | hypothetical conserved protein                |
| CcrRogue_gp269 | + | gacgacaacgAGGAGGgcccgc  | atg | aggagg | 5  | hypothetical novel protein                    |
| CcrRogue_gp270 | + | cgctcatgaAGGgcccgttcta  | atg | agg    | 10 | hypothetical novel protein                    |
| CcrRogue_gp271 | + | cgccgcccgcgtcccgttcta   | atg | None   | 0  | hypothetical conserved protein                |
| CcrRogue_gp272 | + | gacgacaacgAGGAGGcccccc  | atg | aggagg | 5  | hypothetical conserved protein                |
| CcrRogue_gp273 | + | gtggcgccgAGGcctaaagcc   | atg | gagg   | 8  | hypothetical novel protein                    |
| CcrRogue_gp274 | + | ggcgctgacgaAGGcgtggtg   | atg | agg    | 7  | hypothetical conserved protein                |
| CcrRogue_gp275 | + | taatctggaAGGAGccttaag   | ttg | gagg   | 8  | hypothetical conserved protein                |
| CcrRogue_gp276 | + | aagttctAGGAaAGGAagacc   | atg | agga   | 5  | hypothetical novel protein                    |
| CcrRogue_gp277 | + | acaacgcccGGAGcccccttttc | atg | ggagg  | 8  | hypothetical novel protein                    |
| CcrRogue_gp278 | + | cgccgctcGGGtggttcga     | atg | gggg   | 8  | hypothetical novel protein                    |
| CcrRogue_gp279 | + | actactagGGAGccccgac     | atg | ggagg  | 8  | hypothetical novel protein                    |
| CcrRogue_gp280 | + | acgacaacgaaAGGAGGccccg  | atg | aggagg | 5  | hypothetical novel protein                    |
| CcrRogue_gp281 | + | cgaccgatGGGTacgcccgc    | atg | gggg   | 8  | hypothetical novel protein                    |
| CcrRogue_gp282 | + | ctcccacgacggctacgatct   | gtg | None   | 0  | hypothetical conserved protein                |
| CcrRogue_gp283 | + | gctgctggcgggcgtggacct   | gtg | None   | 0  | hypothetical novel protein                    |
| CcrRogue_gp284 | + | ccagatgaAGGAGccccgctc   | ttg | aggag  | 8  | hypothetical novel protein                    |
| CcrRogue_gp285 | + | acctcagaAGGAGccccagcc   | ttg | aggagg | 7  | hypothetical novel protein                    |
| CcrRogue_gp286 | + | ctctcgtctAGGAGaccgctc   | ttg | aggag  | 7  | hypothetical conserved protein                |
| CcrRogue_gp287 | + | ggcctacgcttcggtgagcgc   | atg | None   | 0  | hypothetical conserved protein                |
| CcrRogue_gp288 | + | gtctcggAGGAGgaaacaaac   | gtg | ggagg  | 10 | hypothetical conserved protein                |
| CcrRogue_gp289 | + | cggaacataatAGGAGTccag   | atg | aggagg | 4  | hypothetical novel protein                    |
| CcrRogue_gp290 | + | ggcggtcgaacgcccggcggg   | gtg | None   | 0  | hypothetical conserved protein                |
| CcrRogue_gp291 | + | cttcgctcGGGtggttcgc     | atg | gggg   | 8  | hypothetical novel protein                    |
| CcrRogue_gp292 | + | cgactaccgctAGGAGTccc    | atg | aggagg | 4  | hypothetical conserved protein                |
| CcrRogue_gp293 | + | cgacgacggAGGAGcctgac    | atg | aggag  | 7  | hypothetical novel protein                    |
| CcrRogue_gp294 | + | ctccGGAGGccccgacatggca  | atg | ggagg  | 12 | hypothetical novel protein                    |
| CcrRogue_gp295 | + | catgaAGGcgtcgacctcgg    | atg | agg    | 13 | hypothetical conserved protein                |
| CcrRogue_gp296 | + | cgacgacaacAGGAGGccctc   | atg | aggagg | 5  | hypothetical conserved protein                |
| CcrRogue_gp297 | + | ttcgccctcagAGGAttcggtt  | atg | agga   | 6  | hypothetical conserved protein                |
| CcrRogue_gp298 | + | ccggcgctgacgggtgcatc    | atg | None   | 0  | hypothetical conserved protein                |
| CcrRogue_gp299 | + | gacgacaacgAGGAGGcccccc  | atg | aggagg | 5  | hypothetical conserved protein                |
| CcrRogue_gp300 | + | atcaaggtGGAGTctcaagcc   | atg | ggaggt | 7  | hypothetical novel protein                    |
| CcrRogue_gp301 | + | ttcgggtGGAGccagcctcgc   | atg | ggagg  | 10 | hypothetical novel protein                    |
| CcrRogue_gp302 | + | catcgagcagAGGAagcaatc   | gtg | agga   | 7  | hypothetical conserved protein                |
| CcrRogue_gp303 | + | gggactgGGAGacgacgactg   | atg | ggag   | 10 | hypothetical conserved protein                |
| CcrRogue_gp304 | + | acgctgcgaAGGAGccccacc   | gtg | aggag  | 7  | putative winged-helix HTH DNA binding protein |

IPRO11681

IPRO06311; PRED-TAT

IPRO01849

IPRO04843, IPRO06186, SSF56300, PTHR11668, G3DSA:3.60.21.10

IPRO11991

|                |   |                        |     |        |    |                                     |                                                                                                                  |
|----------------|---|------------------------|-----|--------|----|-------------------------------------|------------------------------------------------------------------------------------------------------------------|
| CcrRogue_gp305 | + | catgctgaaagagaAGGccgc  | atg | agg    | 4  | hypothetical conserved protein      |                                                                                                                  |
| CcrRogue_gp306 | + | ccgcaagctGGAGccgacct   | gtg | ggagg  | 7  | hypothetical conserved protein      |                                                                                                                  |
| CcrRogue_gp307 | + | ccgcgacacggcaAGGAacgc  | atg | agga   | 4  | hypothetical conserved protein      |                                                                                                                  |
| CcrRogue_gp308 | + | ccctgcacgcaAGGGctgac   | atg | gggg   | 5  | hypothetical conserved protein      |                                                                                                                  |
| CcrRogue_gp309 | + | gcgctttgatcccgtagacctg | atg | None   | 0  | hypothetical conserved protein      |                                                                                                                  |
| CcrRogue_gp310 | + | cctgcacgGGAGctcatctg   | atg | gga    | 9  | hypothetical conserved protein      |                                                                                                                  |
| CcrRogue_gp311 | + | cgacgtgccGAGGcgacctg   | atg | gagg   | 8  | hypothetical conserved protein      |                                                                                                                  |
| CcrRogue_gp312 | + | cttcgacggctGGAGGTcgtc  | atg | ggaggt | 4  | hypothetical conserved protein      |                                                                                                                  |
| CcrRogue_gp313 | + | tctggagtacGGGcgtcca    | gtg | gggg   | 6  | putative HNH homing endonuclease    | IPR002711                                                                                                        |
| CcrRogue_gp314 | + | cgacaacgaAGGAGccccgcg  | atg | aggag  | 7  | hypothetical novel protein          |                                                                                                                  |
| CcrRogue_gp315 | + | cgaaagcccgccggcgccgcg  | atg | None   | 0  | hypothetical novel protein          |                                                                                                                  |
| CcrRogue_gp316 | + | gatccgctatcctcggggctt  | ttg | None   | 0  | hypothetical conserved protein      |                                                                                                                  |
| CcrRogue_gp317 | + | tctgcgacaacatctggacct  | atg | None   | 0  | hypothetical conserved protein      |                                                                                                                  |
| CcrRogue_gp318 | + | gtttctccAGGAGatgttcgc  | ttg | aggag  | 8  | hypothetical novel protein          |                                                                                                                  |
| CcrRogue_gp319 | + | cgactactttgggtccggccg  | atg | None   | 0  | hypothetical conserved protein      |                                                                                                                  |
| CcrRogue_gp320 | + | cgactaccggctgtgtctgc   | atg | None   | 0  | hypothetical novel protein          |                                                                                                                  |
| CcrRogue_gp321 | + | ctacacgttGAGGcggtgcg   | atg | gagg   | 8  | hypothetical novel protein          |                                                                                                                  |
| CcrRogue_gp322 | + | actctctagtaAGGcttcatt  | atg | agg    | 7  | hypothetical novel protein          |                                                                                                                  |
| CcrRogue_gp323 | + | tacaagaGGGaaatatacca   | atg | gggg   | 10 | hypothetical conserved protein      |                                                                                                                  |
| CcrRogue_gp324 | + | ttggtccctcgGAGccgctc   | atg | ggag   | 6  | hypothetical conserved protein      |                                                                                                                  |
| CcrRogue_gp325 | + | gccatcgctcAGGcaggacc   | atg | gag    | 7  | hypothetical conserved protein      |                                                                                                                  |
| CcrRogue_gp326 | + | cgacggcgtGGAGctgaccga  | atg | gga    | 9  | hypothetical novel protein          |                                                                                                                  |
| CcrRogue_gp327 | + | tgacgacgtggcggtggtgc   | atg | None   | 0  | putative RNaseH-like domain protein | IPR012337                                                                                                        |
| CcrRogue_gp328 | + | cgaaacggcGGAGttcccg    | ttg | ggag   | 8  | hypothetical conserved protein      |                                                                                                                  |
| CcrRogue_gp329 | + | aggtcaccAGGAaaaggtcg   | atg | agga   | 8  | hypothetical conserved protein      |                                                                                                                  |
| CcrRogue_gp330 | + | agcgcccGGAactctgatccc  | atg | gga    | 11 | Terminase small subunit             | HHpred vs pdb70_18Aug12, hit 3zqp_A, prob 95.7% E=0.0062; position relative to terminase large subunit, see text |
| CcrRogue_gp331 | + | cgcgctgaccactgatcgtct  | atg | None   | 0  | Terminase large subunit             | IPR004921, IPR007868, IPR006141, IPR003587, IPR006517, SSF51294, G3DSA:2.170.16.10                               |

**Table S6.** Predicted proteins, gene starts and annotations of *C. crescentus* phage CcrColossus. Upstream sequence is the 25 bp of DNA sequence upstream of the start codon, with the predicted Shine-Dalgarno motif capitalized. S-D is the Shine-Dalgarno motif associated with the gene start, and spacing is the interval (in bp) between the S-D and start codon. Evidence includes detected conserved domains or motifs, BlastP and HHpred hits, and experimental or other evidence as detailed in the text.

| Protein name      | Strand | Upstream Sequence       | Start Codon | S-D    | spacing | Predicted product                                 | Evidence                                                                                 |
|-------------------|--------|-------------------------|-------------|--------|---------|---------------------------------------------------|------------------------------------------------------------------------------------------|
| CcrColossus_gp001 | -      | cgcgctctccaAGGTgaatcc   | atg         | aggt   | 6       | hypothetical novel protein                        |                                                                                          |
| CcrColossus_gp002 | -      | tctttgacatcgtGAGGcate   | atg         | gagg   | 4       | hypothetical novel protein                        |                                                                                          |
| CcrColossus_gp003 | +      | tcccgcgccctGGAGctctcgc  | atg         | ggag   | 6       | hypothetical conserved protein                    |                                                                                          |
| CcrColossus_gp004 | +      | gccttcaagtAGGAGtgcgcc   | gtg         | aggag  | 6       | hypothetical novel protein                        |                                                                                          |
| CcrColossus_gp005 | +      | tcccgcctGGAGatgaaccgc   | atg         | ggag   | 8       | hypothetical novel protein                        |                                                                                          |
| CcrColossus_gp006 | +      | ccgcgcctGGAGcaagtcaac   | atg         | ggag   | 8       | hypothetical novel protein                        |                                                                                          |
| CcrColossus_gp007 | +      | ccgcctgatccgtGAGGggcg   | atg         | gagg   | 4       | hypothetical novel protein                        |                                                                                          |
| CcrColossus_gp008 | +      | tcccgcctGGAGaacctgag    | atg         | ggag   | 8       | hypothetical novel protein                        |                                                                                          |
| CcrColossus_gp009 | +      | gtcccgcGGAGaaaaacgac    | atg         | ggag   | 9       | hypothetical novel protein                        |                                                                                          |
| CcrColossus_gp010 | +      | gcctctctGGAGcgcgaagccc  | atg         | ggag   | 9       | hypothetical novel protein                        |                                                                                          |
| CcrColossus_gp011 | +      | catccccctGGAGcgcgaagccc | atg         | ggag   | 9       | hypothetical novel protein                        |                                                                                          |
| CcrColossus_gp012 | +      | acccctcgtttgggtgtcgag   | ttg         | None   | 0       | hypothetical conserved protein                    |                                                                                          |
| CcrColossus_gp013 | +      | ccctcaggacaAGGAGtccgc   | atg         | aggag  | 5       | hypothetical novel protein                        |                                                                                          |
| CcrColossus_gp014 | +      | ccccaaactcacgGAGGccacc  | atg         | ggagg  | 4       | hypothetical conserved protein                    |                                                                                          |
| CcrColossus_gp015 | +      | ccgcgcctGGAGaacgcac     | atg         | ggag   | 7       | hypothetical conserved protein                    |                                                                                          |
| CcrColossus_gp016 | +      | aaagcctggaaaAGGccctgaa  | atg         | agg    | 7       | hypothetical novel protein                        |                                                                                          |
| CcrColossus_gp017 | +      | accctcggGAGAcaccccgcc   | atg         | ggag   | 9       | hypothetical conserved protein                    |                                                                                          |
| CcrColossus_gp018 | +      | tccgcgaAGGcggcctagctc   | atg         | agg    | 11      | hypothetical novel protein                        |                                                                                          |
| CcrColossus_gp019 | +      | atccgcaAGGAagcctaacgc   | atg         | agga   | 10      | hypothetical novel protein                        |                                                                                          |
| CcrColossus_gp020 | +      | tgaactcggGAGccctagccc   | atg         | ggag   | 9       | hypothetical novel protein                        |                                                                                          |
| CcrColossus_gp021 | +      | cctaaccGGAGaaccccgccc   | atg         | ggagg  | 9       | hypothetical novel protein                        |                                                                                          |
| CcrColossus_gp022 | +      | cagtagaacaAGGAGttaaac   | ttg         | aggag  | 5       | hypothetical novel protein                        |                                                                                          |
| CcrColossus_gp023 | +      | ctttctgtTGGAGcgcagaca   | atg         | ggag   | 8       | hypothetical novel protein                        |                                                                                          |
| CcrColossus_gp024 | +      | ccgcgcctGGAGaaaatcgg    | atg         | ggag   | 8       | hypothetical novel protein                        |                                                                                          |
| CcrColossus_gp025 | +      | cgccctaccGGAGcgcctaac   | atg         | ggag   | 8       | hypothetical novel protein                        |                                                                                          |
| CcrColossus_gp026 | +      | tcaagcctAGGAGGgctgac    | atg         | aggagg | 7       | hypothetical novel protein                        |                                                                                          |
| CcrColossus_gp027 | +      | tcttgttaaaaaTAGGccct    | atg         | agg    | 4       | hypothetical novel protein                        |                                                                                          |
| CcrColossus_gp028 | +      | cccaagcctGGAGtccgctc    | atg         | ggag   | 7       | hypothetical novel protein                        |                                                                                          |
| CcrColossus_gp029 | +      | ccctagctGGAGcgaagccc    | atg         | ggag   | 9       | hypothetical novel protein                        |                                                                                          |
| CcrColossus_gp030 | +      | acaaacctgaaaAGGAcacccc  | ttg         | agga   | 6       | hypothetical novel protein                        |                                                                                          |
| CcrColossus_gp031 | +      | aatggcctctaAGTgactaac   | atg         | gag    | 7       | hypothetical novel protein                        |                                                                                          |
| CcrColossus_gp032 | +      | ctaggactGGAGtccctcgca   | atg         | ggag   | 9       | hypothetical novel protein                        |                                                                                          |
| CcrColossus_gp033 | +      | cttcccctctaGAGtctgct    | atg         | gag    | 7       | hypothetical novel protein                        |                                                                                          |
| CcrColossus_gp034 | +      | aaagcctTAGGAGacaagcg    | atg         | aggag  | 8       | hypothetical novel protein                        |                                                                                          |
| CcrColossus_gp035 | +      | cctcaactcGGAGcccctgcc   | atg         | ggag   | 8       | hypothetical conserved protein                    |                                                                                          |
| CcrColossus_gp036 | -      | tccatcaatcAGGAGattcag   | gtg         | aggag  | 6       | hypothetical conserved protein                    |                                                                                          |
| CcrColossus_gp037 | -      | ttctctgcccGAGcttctctgc  | atg         | gga    | 9       | putative transglutaminase-like cysteine peptidase | IPR010319, PSS1257                                                                       |
| CcrColossus_gp038 | +      | cgcccacttttcaaaagaac    | atg         | None   | 0       | putative portal protein                           | HHpred vs pdb70_18Aug12, hit 2jes_A, prob 99.6% E=9.1E-15; positional evidence, see text |
| CcrColossus_gp039 | +      | gcccgaaaaTAGGAGcagcta   | atg         | ggag   | 7       | hypothetical novel protein                        |                                                                                          |
| CcrColossus_gp040 | +      | tccggtgaAGGAGcgaagcctc  | atg         | agga   | 9       | hypothetical novel protein                        |                                                                                          |
| CcrColossus_gp041 | +      | ctccaagcctGGAaagaagaa   | gtg         | gga    | 8       | hypothetical novel protein                        |                                                                                          |
| CcrColossus_gp042 | +      | ttcagtagccagcgtatcgccc  | atg         | None   | 0       | hypothetical conserved protein                    |                                                                                          |
| CcrColossus_gp043 | +      | tccgaagaAGGAGactagcccgc | atg         | agga   | 9       | hypothetical novel protein                        |                                                                                          |
| CcrColossus_gp044 | +      | tgaagctaaAGGAGctccc     | gtg         | aggag  | 6       | hypothetical novel protein                        |                                                                                          |
| CcrColossus_gp045 | +      | gctcgtcttcggcctaagccg   | atg         | None   | 0       | hypothetical novel protein                        |                                                                                          |
| CcrColossus_gp046 | +      | cgagctcctgctGGGctgatgt  | atg         | gggg   | 6       | hypothetical novel protein                        |                                                                                          |
| CcrColossus_gp047 | +      | gttctctgatGGGctcgcact   | atg         | gggg   | 8       | hypothetical novel protein                        |                                                                                          |
| CcrColossus_gp048 | +      | ctgcccatttggctgtgacga   | atg         | None   | 0       | hypothetical novel protein                        |                                                                                          |
| CcrColossus_gp049 | +      | cttcagtcctGGAGGaaataa   | atg         | ggagg  | 5       | putative ATPase domain protein                    | PD968187                                                                                 |
| CcrColossus_gp050 | +      | ccgcctcagaAGGgttgatc    | atg         | agg    | 7       | hypothetical conserved protein                    | SSF52540, G3DSA:3.40.50.300                                                              |
| CcrColossus_gp051 | +      | agtcgacagAGGAGcctaatac  | atg         | ggag   | 7       | hypothetical novel protein                        |                                                                                          |
| CcrColossus_gp052 | +      | ctctcgcacAGGTTtaagccc   | atg         | gagggt | 7       | hypothetical conserved protein                    |                                                                                          |
| CcrColossus_gp053 | +      | cttcccctcggctcggctg     | atg         | None   | 0       | hypothetical novel protein                        |                                                                                          |
| CcrColossus_gp054 | +      | attcgaagaactggtcagccc   | atg         | None   | 0       | hypothetical novel protein                        |                                                                                          |
| CcrColossus_gp055 | +      | ctcgcgcagAGGAGcactctg   | atg         | ggag   | 6       | hypothetical novel protein                        |                                                                                          |
| CcrColossus_gp056 | +      | ggtcggccggtAGGAGGagtc   | atg         | aggagg | 4       | hypothetical conserved protein                    |                                                                                          |
| CcrColossus_gp057 | +      | attgctaccgctcAGGaat     | ttg         | agg    | 4       | putative Ntn hydrolase domain protein             | SSF56235                                                                                 |
| CcrColossus_gp058 | +      | caacctgaagtgcGAGGatta   | atg         | gag    | 4       | hypothetical novel protein                        |                                                                                          |
| CcrColossus_gp059 | +      | tcttctcatgctGGGctcat    | gtg         | gggg   | 4       | hypothetical conserved protein                    |                                                                                          |
| CcrColossus_gp060 | +      | ggaatgaaaaAGGTcgcctg    | atg         | aggt   | 6       | hypothetical conserved protein                    |                                                                                          |
| CcrColossus_gp061 | +      | cgccccgcAGGAGcgaaggc    | gtg         | ggag   | 7       | hypothetical conserved protein                    |                                                                                          |
| CcrColossus_gp062 | +      | cctcccgcAGGAGcgcctgctc  | atg         | gga    | 9       | hypothetical novel protein                        |                                                                                          |
| CcrColossus_gp063 | +      | ggtaccgcccAGGAGtaagac   | atg         | agga   | 6       | hypothetical novel protein                        |                                                                                          |
| CcrColossus_gp064 | +      | ccgcgaaagAGGAGaaatagg   | atg         | agga   | 8       | hypothetical novel protein                        |                                                                                          |
| CcrColossus_gp065 | +      | taacgcttcccggctggtcct   | gtg         | None   | 0       | hypothetical novel protein                        |                                                                                          |
| CcrColossus_gp066 | +      | tctgcacctGGAGcaagtcca   | ttg         | ggag   | 8       | hypothetical novel protein                        |                                                                                          |
| CcrColossus_gp067 | +      | tctggtGGAGtgccgacta     | atg         | gga    | 11      | hypothetical conserved protein                    |                                                                                          |
| CcrColossus_gp068 | +      | gcaagcccAGGAGcaagcctg   | atg         | gga    | 9       | hypothetical novel protein                        |                                                                                          |
| CcrColossus_gp069 | +      | tcgcaaatGGAGtgcgctc     | gtg         | ggag   | 8       | hypothetical conserved protein                    |                                                                                          |
| CcrColossus_gp070 | +      | cttcgacgaagaAGGcctctg   | atg         | agg    | 6       | putative DHH phosphoesterase protein              | SSF64182                                                                                 |
| CcrColossus_gp071 | +      | gatcggctgGGAGggcgctc    | gtg         | ggagg  | 7       | hypothetical novel protein                        |                                                                                          |
| CcrColossus_gp072 | +      | atGGAcacttcGGAGcaagcg   | ctg         | gga    | 6       | hypothetical novel protein                        |                                                                                          |
| CcrColossus_gp073 | +      | agcgtgaAGGAGccctcage    | atg         | aggag  | 8       | hypothetical conserved protein                    |                                                                                          |

|                   |   |                        |     |        |    |                                                                   |                                                                                                                |
|-------------------|---|------------------------|-----|--------|----|-------------------------------------------------------------------|----------------------------------------------------------------------------------------------------------------|
| CcrColossus_gp074 | + | caaccgacAGGcggetgcgge  | gtg | agg    | 10 | hypothetical novel protein                                        |                                                                                                                |
| CcrColossus_gp075 | + | acattatGAGatcGAGccgc   | ttg | gag    | 5  | hypothetical novel protein                                        |                                                                                                                |
| CcrColossus_gp076 | + | aggactcaccagtGGAtcct   | atg | ggag   | 4  | hypothetical novel protein                                        |                                                                                                                |
| CcrColossus_gp077 | + | cctgcGAGGgacttctgtctg  | atg | gagg   | 12 | hypothetical conserved protein                                    |                                                                                                                |
| CcrColossus_gp078 | + | ccgcgacGAGtaccaccgcta  | atg | gag    | 11 | hypothetical conserved protein                                    |                                                                                                                |
| CcrColossus_gp079 | + | tcacaacgctgctgacaccca  | atg | None   | 0  | putative HHN endonuclease                                         | IPR002711, G3DSA:3.90.10.10                                                                                    |
| CcrColossus_gp080 | + | gcccgtctccccAGGgcttg   | ttg | agg    | 5  | hypothetical conserved protein                                    |                                                                                                                |
| CcrColossus_gp081 | + | accaactaaGGAAagctcta   | atg | gga    | 8  | putative major capsid protein                                     | experimental evidence, see text                                                                                |
| CcrColossus_gp082 | + | cttttctaAGGcactctgaa   | atg | agg    | 10 | putative minor capsid protein                                     | experimental evidence, see text                                                                                |
| CcrColossus_gp083 | - | atagttaaaccGGGttccctc  | atg | gggg   | 7  | hypothetical conserved protein                                    |                                                                                                                |
| CcrColossus_gp084 | + | ttcctccgcgcAGGAaccac   | atg | agga   | 5  | hypothetical novel protein                                        |                                                                                                                |
| CcrColossus_gp085 | - | ggcagttcggaggGTCcgcgt  | atg | aggT   | 6  | hypothetical novel protein                                        |                                                                                                                |
| CcrColossus_gp086 | + | ccctcttctggcGGAatttctg | gtg | gga    | 7  | hypothetical conserved protein                                    |                                                                                                                |
| CcrColossus_gp087 | + | ccGGAGatcgaaggcggcacc  | atg | ggag   | 15 | hypothetical conserved protein                                    |                                                                                                                |
| CcrColossus_gp088 | + | gtacagcaactAGGTccaacg  | atg | aggT   | 6  | hypothetical conserved protein                                    |                                                                                                                |
| CcrColossus_gp089 | + | cactctccttctcgaactaa   | atg | None   | 0  | hypothetical conserved protein                                    |                                                                                                                |
| CcrColossus_gp090 | + | actttctaaAGGgcaaacg    | atg | agg    | 9  | hypothetical conserved protein                                    |                                                                                                                |
| CcrColossus_gp091 | + | tgatcgaagcggccctgactc  | gtg | None   | 0  | putative lectin-like domain protein                               | IPR013320, IPR008985                                                                                           |
| CcrColossus_gp092 | + | ctacgtgctggcgaacctcca  | atg | None   | 0  | hypothetical conserved protein                                    |                                                                                                                |
| CcrColossus_gp093 | + | ctgtttctgcttAGGTgaact  | atg | aggT   | 5  | hypothetical conserved protein                                    |                                                                                                                |
| CcrColossus_gp094 | + | cggttttttgcactgtagg    | ttg | None   | 0  | hypothetical novel protein                                        |                                                                                                                |
| CcrColossus_gp095 | + | gtcctcggagcgggaAGGccat | atg | agg    | 4  | hypothetical novel protein                                        |                                                                                                                |
| CcrColossus_gp096 | + | caccgccaAGGTtctgctgaa  | atg | aggT   | 9  | hypothetical conserved protein                                    |                                                                                                                |
| CcrColossus_gp097 | + | gatcgtccAGGAGGgaccgac  | atg | aggaag | 7  | hypothetical novel protein                                        |                                                                                                                |
| CcrColossus_gp098 | + | cgcgagcaagGAGGccgcaac  | atg | ggag   | 7  | hypothetical novel protein                                        |                                                                                                                |
| CcrColossus_gp099 | - | catcaaaccaAGGAataccat  | atg | agga   | 7  | hypothetical novel protein                                        |                                                                                                                |
| CcrColossus_gp100 | + | ttggcgaagcctaactgccc   | atg | None   | 0  | putative FkbM-like methyltransferase                              | IPR006342, G3DSA:3.40.50.150                                                                                   |
| CcrColossus_gp101 | + | cgcaataacgAGGAGacttae  | atg | agga   | 6  | hypothetical conserved protein                                    |                                                                                                                |
| CcrColossus_gp102 | + | ccaccgctccccGGAGcttcc  | atg | gga    | 5  | putative protein metallo-phosphoesterase                          | IPR004843, SSF56300, G3DSA:3.60.21.10                                                                          |
| CcrColossus_gp103 | + | tctggtggtGGAGatttaacg  | atg | gga    | 8  | hypothetical conserved protein                                    |                                                                                                                |
| CcrColossus_gp104 | + | ctctccAGGAGcagcagccta  | atg | agga   | 11 | putative peptide formylmethionine deformylase                     | IPR000181                                                                                                      |
| CcrColossus_gp105 | + | aaectctgctcGGAGtccac   | atg | gga    | 5  | hypothetical conserved protein                                    |                                                                                                                |
| CcrColossus_gp106 | + | ctaccgtcGGGaacgaaggct  | gtg | gggg   | 9  | hypothetical novel protein                                        |                                                                                                                |
| CcrColossus_gp107 | + | gatcgcgctcggGAGatcga   | atg | gga    | 6  | hypothetical novel protein                                        |                                                                                                                |
| CcrColossus_gp108 | + | acgcgccccGGAGGgacac    | atg | ggagg  | 6  | hypothetical novel protein                                        |                                                                                                                |
| CcrColossus_gp109 | + | taecgcgcaagGAGGcagct   | ttg | ggag   | 6  | putative PhoH-like protein                                        | IPR003714, SSF52540, G3DSA:3.40.50.300                                                                         |
| CcrColossus_gp110 | + | agtcataAGGtagaagcgtcg  | atg | agg    | 12 | hypothetical conserved protein                                    |                                                                                                                |
| CcrColossus_gp111 | + | aaagtcgtcccgctcgtaatcc | atg | None   | 0  | hypothetical conserved protein                                    |                                                                                                                |
| CcrColossus_gp112 | + | tcagatgctgctggcctaac   | gtg | None   | 0  | hypothetical conserved protein                                    |                                                                                                                |
| CcrColossus_gp113 | + | cgaaactatggcAGGTgtcct  | gtg | aggT   | 5  | hypothetical novel protein                                        |                                                                                                                |
| CcrColossus_gp114 | + | gctctctgAGGAGactgacc   | gtg | agga   | 8  | hypothetical conserved protein                                    |                                                                                                                |
| CcrColossus_gp115 | + | tgcaacttttggggcgagaa   | atg | None   | 0  | putative major tail tube protein                                  | experimental evidence, see text                                                                                |
| CcrColossus_gp116 | + | ccctgacaaAGGTaacccgaaa | atg | aggT   | 9  | putative pre-tape measure chaperone protein                       | HHpred vs pdb70_18Aug12, hit 2ob9_A, prob 60.2% E=27; positional evidence, see text                            |
| CcrColossus_gp117 | + | ccctgacaaAGGTaacccgaaa | atg | aggT   | 9  | putative pre-tape measure chaperone protein, frameshifted version | positional evidence, see text; slippery sequence AAAAAAC                                                       |
| CcrColossus_gp118 | + | cttcgcgggcctGAGGgatag  | atg | gagg   | 5  | putative tail tape measure protein                                | IPR008258, IPR013491, SSF53955, G3DSA:1.10.530.10; experimental evidence, see text                             |
| CcrColossus_gp119 | + | caacaacGAGttaacccccagc | atg | gag    | 12 | DUF2460 protein                                                   | IPR011740                                                                                                      |
| CcrColossus_gp120 | + | tgattGGGGgaaacctgttcta | atg | gggg   | 11 | putative tail protein                                             | IPR019228, IPR018964, IPR01928; experimental evidence, see text                                                |
| CcrColossus_gp121 | + | accGGAcgctccgacctcgtat | atg | gga    | 15 | putative NipC/P60 family cell wall peptidase                      | IPR000064, SSF54001, G3DSA:3.90.1720.10                                                                        |
| CcrColossus_gp122 | + | ttccctggcgtGGAGGactaa  | atg | ggagg  | 5  | putative tail protein                                             | experimental evidence, see text                                                                                |
| CcrColossus_gp123 | + | ccccgtacaccGAGTctctaga | atg | gag    | 7  | putative tail protein                                             | experimental evidence, see text                                                                                |
| CcrColossus_gp124 | + | gagtcacgcttctggtccaaaa | atg | None   | 0  | hypothetical conserved protein                                    |                                                                                                                |
| CcrColossus_gp125 | + | tcaAGGgctctacttctaaa   | atg | agg    | 15 | putative tail protein                                             | IPR000421, IPR008979, G3DSA:2.60.120.260; experimental evidence, see text                                      |
| CcrColossus_gp126 | + | ttattgggcaacaGAGtctcta | atg | gag    | 6  | putative alpha-2,3-sialyltransferase-like protein                 | IPR009251                                                                                                      |
| CcrColossus_gp127 | + | tcttcgcttaagacctagg    | atg | None   | 0  | hypothetical novel protein                                        |                                                                                                                |
| CcrColossus_gp128 | + | ggtgcccGAGGTggcaagatc  | atg | gaggT  | 9  | hypothetical conserved protein                                    |                                                                                                                |
| CcrColossus_gp129 | + | gcccgaattGGAGccttge    | atg | gga    | 8  | putative nucleotide-diphospho-sugar transferase                   | SSF53448                                                                                                       |
| CcrColossus_gp130 | + | tGGAttGGAccegcctctcc   | atg | gga    | 12 | hypothetical conserved protein                                    |                                                                                                                |
| CcrColossus_gp131 | + | gcgatcGGAGacgcatgggca  | atg | ggag   | 11 | putative family 9 glycosyl transferase                            | IPR002201, SSF53756, G3DSA:3.40.50.2000                                                                        |
| CcrColossus_gp132 | + | gtcggcaattGGAGaaggtcc  | atg | ggag   | 7  | hypothetical conserved protein                                    |                                                                                                                |
| CcrColossus_gp133 | + | tcaccgaaAGGgcatctcatca | atg | agg    | 10 | putative RNA polymerase alpha subunit C-terminal domain protein   | IPR011260, G3DSA:1.10.150.20                                                                                   |
| CcrColossus_gp134 | + | atcttctcGAGcctctctgac  | atg | gag    | 10 | putative endolysin                                                | IPR002196, SSF53955, G3DSA:1.10.530.40                                                                         |
| CcrColossus_gp135 | + | ggcttGGAGTtcaagggcta   | atg | ggag   | 12 | putative holin protein                                            | predicted 4 TMDs, see text                                                                                     |
| CcrColossus_gp136 | + | caaatcAGGTgaccgactag   | atg | aggT   | 10 | putative inner membrane spanin component                          | N-terminal TMD, outer membrane spanin component embedded in +1 frame, see text                                 |
| CcrColossus_gp137 | + | ctgaaagtGGAcacccctctc  | atg | gga    | 11 | putative outer membrane spanin component                          | lipoprotein embedded in inner membrane spanin component, see text                                              |
| CcrColossus_gp138 | + | tcggcaagaAGGAatagcgc   | atg | agga   | 8  | hypothetical novel protein                                        |                                                                                                                |
| CcrColossus_gp139 | - | agtagAGGAGcggaccgcgacc | atg | agga   | 11 | putative TROVE-like domain protein                                | IPR008858, SSF140864, SSF53300                                                                                 |
| CcrColossus_gp140 | - | ggcacccgacaAGGAcgaagge | atg | agga   | 7  | putative HTH domain DNA-binding protein                           | IPR001387, IPR010982, G3DSA:1.10.260.40                                                                        |
| CcrColossus_gp141 | - | acctacctgaAGGactaacccc | atg | agga   | 7  | putative dUTP pyrophosphatase                                     | IPR008181, IPR008180, SSF51283, PTHR11241, G3DSA:2.70.40.10                                                    |
| CcrColossus_gp142 | - | cccttttttcGAGcgccttta  | atg | gag    | 8  | putative ribonucleoside diphosphate reductase beta subunit        | IPR012348, IPR012335, IPR000358, IPR002109, IPR011767, IPR009078, IPR012336, PTHR23409:SF5,                    |
| CcrColossus_gp143 | - | ctttttttctcGGAaccgttac | atg | gga    | 7  | putative ribonucleoside diphosphate reductase alpha subunit       | IPR000788, IPR013509, IPR003587, IPR006141, IPR008926, SSF51998, SSF51294, G3DSA:3.20.70.20, G3DSA:2.170.16.10 |
| CcrColossus_gp144 | - | tagtcagtaGAGcgtcgcgt   | atg | gag    | 9  | hypothetical conserved protein                                    |                                                                                                                |
| CcrColossus_gp145 | - | ccgcctcGGAGaaataggctc  | atg | ggagg  | 9  | hypothetical conserved protein                                    |                                                                                                                |
| CcrColossus_gp146 | - | caccaccgctaAGGAcacc    | atg | agga   | 5  | hypothetical novel protein                                        |                                                                                                                |
| CcrColossus_gp147 | - | tgccaatGAGTtctgctcccaa | atg | gag    | 11 | hypothetical conserved protein                                    |                                                                                                                |
| CcrColossus_gp148 | - | cccccaaaaaGAGcgcact    | atg | gag    | 6  | hypothetical conserved protein                                    |                                                                                                                |
| CcrColossus_gp149 | - | tcgaaacGAGcgcctgtaacc  | gtg | gag    | 11 | hypothetical novel protein                                        |                                                                                                                |
| CcrColossus_gp150 | - | gaaccagtagcaaaagccgc   | atg | None   | 0  | putative thymidylate synthase                                     | IPR003669                                                                                                      |

|                   |   |                        |     |        |    |                                               |                                                                                                                                  |
|-------------------|---|------------------------|-----|--------|----|-----------------------------------------------|----------------------------------------------------------------------------------------------------------------------------------|
| CcrColossus_gp151 | - | ccgacgectAGGAagtegecc  | atg | agga   | 8  | hypothetical novel protein                    |                                                                                                                                  |
| CcrColossus_gp152 | - | gtectgtctcAGGAaacacc   | atg | agga   | 6  | putative dNMP kinase                          | HHpred vs pdb70_18Aug12, hit 3ch4_B, prob 99.9% E=8.5E-25; SSF52540, G3DSA:3.40.50.300                                           |
| CcrColossus_gp153 | - | cAGGcgacgcttgcgcaet    | gtg | agg    | 17 | putative RecD-like helicase                   | HHpred vs pdb70_18Aug12, hit 3e1s_A, prob 100% E=1.2E-44; IPR000606, SSF52540, G3DSA:3.40.50.300                                 |
| CcrColossus_gp154 | - | gactttagaagtagaaaaccag | atg | None   | 0  | hypothetical conserved protein                |                                                                                                                                  |
| CcrColossus_gp155 | - | cccgectAGGAGtcacetttc  | atg | aggag  | 9  | hypothetical conserved protein                |                                                                                                                                  |
| CcrColossus_gp156 | - | gccgaAGGgtgctgtaate    | atg | agg    | 13 | putative exonuclease, Pol III-like            | IPR013520, IPR006055, IPR012337, G3DSA:3.30.420.10                                                                               |
| CcrColossus_gp157 | - | aggggctcctccGGAacgac   | atg | gag    | 6  | hypothetical novel protein                    |                                                                                                                                  |
| CcrColossus_gp158 | - | ccttcatGAGGctcgcgcta   | atg | gagg   | 10 | putative Pol I DNA polymerase, T7-like        | IPR001098, IPR012337, SSF56672, PTHR10133, G3DSA:3.30.420.10, G3DSA:1.20.1060.10, G3DSA:3.30.70.370, G3DSA:1.10.150.20; see text |
| CcrColossus_gp159 | - | ccgttaaccatcccgcccccg  | atg | None   | 0  | putative DNA cytosine methyltransferase       | IPR001525, IPR018117, SSF53335, PTHR10629:SF11, G3DSA:3.40.50.150, G3DSA:3.90.120.10                                             |
| CcrColossus_gp160 | - | gaacaaCGGAaagtggcgect  | gtg | gga    | 11 | hypothetical conserved protein                |                                                                                                                                  |
| CcrColossus_gp161 | - | acgccaagctGAGatgttct   | atg | gag    | 7  | putative T5 A1-like protein                   | blastP to T5 A1 (AAU05157), E=6.5E-90, 34.9% Dice identity; HHpred vs pdb70_18Aug12, hit 1g2h_A, prob 95.7% E=0.0072             |
| CcrColossus_gp162 | - | aacggtcaagcctGGAgaaga  | atg | ggag   | 4  | putative DNA methylase                        | IPR002052                                                                                                                        |
| CcrColossus_gp163 | - | cctgectAGGcgcgctcc     | atg | agg    | 10 | hypothetical novel protein                    |                                                                                                                                  |
| CcrColossus_gp164 | - | gctggccGAGacacgtagaa   | atg | gag    | 11 | hypothetical novel protein                    |                                                                                                                                  |
| CcrColossus_gp165 | - | tcgaAGTccaagcctgacgc   | atg | aggt   | 13 | putative DNA helicase                         | IPR000330, IPR014001, IPR001650, IPR014021, SSF52540, PTHR10799, G3DSA:3.40.50.300                                               |
| CcrColossus_gp166 | - | ttccagtAGGAGtcacgttct  | gtg | aggag  | 9  | hypothetical conserved protein                |                                                                                                                                  |
| CcrColossus_gp167 | - | tgggaaaacccccgAGGAcct  | atg | agga   | 4  | putative RNA ligase                           | IPR021122, IPR012646, SSF56091                                                                                                   |
| CcrColossus_gp168 | - | catgcggaAGGAagaacaata  | atg | agga   | 9  | hypothetical novel protein                    |                                                                                                                                  |
| CcrColossus_gp169 | - | ggcggtGAGAtcacccgctg   | atg | ggag   | 11 | conserved T4 30.3-like protein                | IPR012596, SSF143990                                                                                                             |
| CcrColossus_gp170 | - | agacctgGGAActcgactctg  | atg | gga    | 11 | hypothetical novel protein                    |                                                                                                                                  |
| CcrColossus_gp171 | - | cgatgacctAGGAGtcgcta   | atg | aggag  | 7  | hypothetical novel protein                    |                                                                                                                                  |
| CcrColossus_gp172 | - | cagactgacgagAGGAGcctc  | atg | aggag  | 4  | putative nucleotidyltransferase protein       | IPR018775                                                                                                                        |
| CcrColossus_gp173 | - | caagccacGGAagcgcgcaaa  | atg | gga    | 10 | hypothetical novel protein                    |                                                                                                                                  |
| CcrColossus_gp174 | - | gcacgcGGAgaagaagcctc   | atg | ggag   | 11 | hypothetical novel protein                    |                                                                                                                                  |
| CcrColossus_gp175 | - | cgcacgctgtAGGAGcccag   | atg | aggag  | 6  | hypothetical novel protein                    |                                                                                                                                  |
| CcrColossus_gp176 | - | gttcgacaAGGAaacgaagca  | atg | agga   | 9  | hypothetical novel protein                    |                                                                                                                                  |
| CcrColossus_gp177 | - | caagccgacagAGGAtaagt   | atg | agga   | 6  | hypothetical conserved protein                |                                                                                                                                  |
| CcrColossus_gp178 | - | caagtccaAGGcctaaccgacc | atg | agg    | 10 | putative rib-like protein                     | PD130832                                                                                                                         |
| CcrColossus_gp179 | - | caagctaacccggcgggcgct  | atg | None   | 0  | putative rila-like protein                    | IPR003594                                                                                                                        |
| CcrColossus_gp180 | + | tgctctggtatcgAGGAaaga  | ttg | agga   | 4  | hypothetical conserved protein                |                                                                                                                                  |
| CcrColossus_gp181 | + | cgcggaectcggggtgctgaa  | ttg | None   | 0  | hypothetical conserved protein                |                                                                                                                                  |
| CcrColossus_gp182 | + | acgataacgaAGGAGGccccg  | atg | aggag  | 5  | putative tyrosine recombinase                 | IPR013762, IPR002104, IPR011010                                                                                                  |
| CcrColossus_gp183 | + | ttcgtgaacGGATGGAcgag   | gtg | gga    | 5  | hypothetical conserved protein                |                                                                                                                                  |
| CcrColossus_gp184 | - | ccgcaAGGcgggcgctccctg  | atg | agg    | 13 | hypothetical novel protein                    |                                                                                                                                  |
| CcrColossus_gp185 | - | acctttGAGGcaaatggaa    | atg | gagg   | 10 | hypothetical novel protein                    |                                                                                                                                  |
| CcrColossus_gp186 | + | atgagtattacAGGAGtttcc  | atg | aggag  | 5  | hypothetical conserved protein                |                                                                                                                                  |
| CcrColossus_gp187 | + | gtaatgcGAGagtgcatgaa   | atg | ggag   | 10 | hypothetical conserved protein                |                                                                                                                                  |
| CcrColossus_gp188 | + | gcgcgctGGAgaagcctcgc   | gtg | ggag   | 10 | hypothetical conserved protein                |                                                                                                                                  |
| CcrColossus_gp189 | - | ggctgctagaagAGGAtatc   | atg | agga   | 4  | putative YqeY-like protein                    | IPR019004                                                                                                                        |
| CcrColossus_gp190 | - | gcacGGGgaagagcgcgtact  | gtg | gggg   | 13 | hypothetical conserved protein                | G3DSA:1.10.340.30                                                                                                                |
| CcrColossus_gp191 | - | ggccgcaataGGGaaacgac   | atg | gggg   | 7  | putative DNA ligase                           | IPR012340, IPR012310, IPR016027, SSF56091                                                                                        |
| CcrColossus_gp192 | - | cttctaagctGGAAGccgccc  | atg | ggagg  | 6  | hypothetical conserved protein                |                                                                                                                                  |
| CcrColossus_gp193 | - | aaacctctGGAAGcgtttttg  | atg | ggag   | 8  | hypothetical conserved protein                |                                                                                                                                  |
| CcrColossus_gp194 | - | cgctggcgccccGAGGcgctg  | atg | ggagg  | 4  | hypothetical novel protein                    |                                                                                                                                  |
| CcrColossus_gp195 | - | tgGGAtcatagcctcccGGAg  | atg | gga    | 1  | DUF1643 protein                               | IPR012441                                                                                                                        |
| CcrColossus_gp196 | - | tggtccagcAGGcaagaatga  | atg | agg    | 9  | hypothetical novel protein                    |                                                                                                                                  |
| CcrColossus_gp197 | - | acaAGGAGaaagggcctggacg | ttg | aggag  | 13 | hypothetical novel protein                    |                                                                                                                                  |
| CcrColossus_gp198 | - | ctgggactaGAGagatcgacg  | atg | gag    | 7  | hypothetical conserved protein                |                                                                                                                                  |
| CcrColossus_gp199 | - | ccactacacgcccgtgaaagcc | gtg | None   | 0  | hypothetical novel protein                    |                                                                                                                                  |
| CcrColossus_gp200 | - | ctcctgcttaagctggctgct  | gtg | None   | 0  | hypothetical novel protein                    |                                                                                                                                  |
| CcrColossus_gp201 | - | ctaagcctGGAAGGcgcgatc  | atg | ggagg  | 8  | hypothetical novel protein                    |                                                                                                                                  |
| CcrColossus_gp202 | - | tcaactgtaagcAGGAtccc   | atg | agga   | 4  | hypothetical novel protein                    |                                                                                                                                  |
| CcrColossus_gp203 | - | gccaagcttctaGGGctctccc | atg | gggg   | 6  | putative nicotinate phosphoribosyltransferase | IPR015977, IPR002638, PTHR11098                                                                                                  |
| CcrColossus_gp204 | - | atgcccgaatcacGGAcgaatg | atg | gga    | 6  | putative NUDIX hydrolase domain protein       | IPR014729, IPR000086, IPR004820, IPR015797, IPR020084, SSF52374, PSS1462, PTHR22769,                                             |
| CcrColossus_gp205 | - | ccaaaaatggcGAGccgagag  | ttg | gagg   | 7  | hypothetical conserved protein                |                                                                                                                                  |
| CcrColossus_gp206 | - | atgtagcgccctAGGgtcg    | atg | agg    | 4  | hypothetical novel protein                    |                                                                                                                                  |
| CcrColossus_gp207 | - | tctacaAGGAtaaagagcacc  | atg | agga   | 11 | hypothetical novel protein                    |                                                                                                                                  |
| CcrColossus_gp208 | - | ctggaagaAGGcctagtctcg  | gtg | agg    | 10 | hypothetical novel protein                    |                                                                                                                                  |
| CcrColossus_gp209 | - | aaagcctaaatcGAGcaaaag  | atg | gag    | 6  | hypothetical novel protein                    |                                                                                                                                  |
| CcrColossus_gp210 | - | gcctccccGAGtaaccgacg   | atg | gag    | 9  | hypothetical novel protein                    |                                                                                                                                  |
| CcrColossus_gp211 | - | tcaggtcacaacAGGAttccc  | atg | ggag   | 5  | hypothetical novel protein                    |                                                                                                                                  |
| CcrColossus_gp212 | - | ggcgatcggaAGGcgctctg   | atg | agg    | 7  | putative HD-domain/PDEase-like protein        | SSF109604                                                                                                                        |
| CcrColossus_gp213 | - | fgcgcgctGAGGtgactg     | atg | ggagg  | 5  | putative protein metallo-phosphoesterase      | IPR004843, SSF56300, G3DSA:3.60.21.10                                                                                            |
| CcrColossus_gp214 | - | gatctagcccaAGGAGaaacca | atg | aggag  | 5  | hypothetical novel protein                    |                                                                                                                                  |
| CcrColossus_gp215 | - | ccgttctGGGgacgaagta    | atg | gggg   | 8  | hypothetical conserved protein                |                                                                                                                                  |
| CcrColossus_gp216 | - | tgactggcatAGGAGagaacg  | gtg | aggag  | 6  | putative RtcB-like protein                    | IPR001233                                                                                                                        |
| CcrColossus_gp217 | - | tgccatgtcAGGcttgaag    | atg | agg    | 7  | hypothetical novel protein                    |                                                                                                                                  |
| CcrColossus_gp218 | - | gacGGGatgaaaccccctccg  | ctg | gggg   | 14 | hypothetical novel protein                    |                                                                                                                                  |
| CcrColossus_gp219 | - | tgacgaaaAGGAGgagatgct  | gtg | aggag  | 8  | putative TerD-like bacterial stress protein   | IPR003325, G3DSA:2.60.60.30                                                                                                      |
| CcrColossus_gp220 | - | caagcatAGGAGttcaccttc  | gtg | aggag  | 9  | DUF475 protein                                | IPR007427                                                                                                                        |
| CcrColossus_gp221 | - | aacatttccagggGAGaaaccc | atg | ggag   | 5  | putative von Willebrand A domain protein      | IPR002035, SSF53300                                                                                                              |
| CcrColossus_gp222 | - | aaagccttaAGGAcctcatcg  | atg | aggag  | 8  | putative TelA-like resistance protein         | IPR008863                                                                                                                        |
| CcrColossus_gp223 | - | cgattgacacAGGAGaccceaa | ttg | aggag  | 6  | hypothetical novel protein                    |                                                                                                                                  |
| CcrColossus_gp224 | - | tcGGAGGcgccctgtcccac   | atg | ggagg  | 14 | hypothetical novel protein                    |                                                                                                                                  |
| CcrColossus_gp225 | + | tgctcgggcaacttatctcc   | atg | None   | 0  | hypothetical conserved protein                |                                                                                                                                  |
| CcrColossus_gp226 | + | acgacaagcccAGGAGGcaac  | atg | aggagg | 4  | hypothetical conserved protein                |                                                                                                                                  |
| CcrColossus_gp227 | + | ttcaccggGAGaactaaatc   | atg | ggag   | 9  | hypothetical novel protein                    |                                                                                                                                  |

|                   |   |                         |     |         |    |                                                            |                                                                                    |
|-------------------|---|-------------------------|-----|---------|----|------------------------------------------------------------|------------------------------------------------------------------------------------|
| CcrColossus_gp228 | + | catcgagttcGAGGgcattctg  | atg | gagg    | 7  | hypothetical conserved protein                             |                                                                                    |
| CcrColossus_gp229 | + | catagcagaAGGAccoactcc   | gtg | agga    | 8  | putative oxoglutarate oxygenase domain protein             | IPR005123, SSF51197, PSS1471, G3DSA:2.60.120.590                                   |
| CcrColossus_gp230 | + | aaectacaGGGactcattca    | atg | gggg    | 9  | hypothetical novel protein                                 |                                                                                    |
| CcrColossus_gp231 | + | gctggcttttctcgaagttagg  | atg | None    | 0  | hypothetical novel protein                                 |                                                                                    |
| CcrColossus_gp232 | + | ccactagctgaAGGAGtcctc   | atg | aggag   | 5  | hypothetical novel protein                                 |                                                                                    |
| CcrColossus_gp233 | + | gacgatcagAGGAGctagac    | atg | aggag   | 7  | hypothetical conserved protein                             |                                                                                    |
| CcrColossus_gp234 | + | tactgtaAGGGAaacgcgtac   | atg | aggag   | 9  | hypothetical novel protein                                 |                                                                                    |
| CcrColossus_gp235 | + | cctcacagccccAGGtgattc   | atg | gag     | 6  | putative AAA+ ATPase and mitochondrial BCS1 domain protein | IPR014851, IPR003959, IPR003593, IPR003960, SSF52540, PTHR23070, G3DSA:3.40.50.300 |
| CcrColossus_gp236 | + | aaactggcaagcAGGaacattc  | atg | gga     | 7  | hypothetical novel protein                                 |                                                                                    |
| CcrColossus_gp237 | + | ccctaagcccaaaaAGGGeectg | atg | gagg    | 4  | UPF0114 protein                                            | IPR005134                                                                          |
| CcrColossus_gp238 | + | ctctcggaAGGAcactaaac    | atg | agga    | 8  | hypothetical conserved protein                             |                                                                                    |
| CcrColossus_gp239 | + | cgggggcgcagAGGGectgatc  | atg | ggagg   | 6  | hypothetical novel protein                                 |                                                                                    |
| CcrColossus_gp240 | + | cgctacagctcgggcccagcat  | atg | None    | 0  | hypothetical conserved protein                             |                                                                                    |
| CcrColossus_gp241 | + | cgaaaaggGAGGtcctcaccac  | atg | ggag    | 10 | putative lipoprotein                                       | LipoP                                                                              |
| CcrColossus_gp242 | + | ccgcagcagtaGGGgcgcaac   | ttg | gggg    | 5  | putative Csg-like curli assembly protein                   | IPR005534                                                                          |
| CcrColossus_gp243 | + | aaacaaacgacgaAGGAccct   | atg | agga    | 4  | hypothetical novel protein                                 |                                                                                    |
| CcrColossus_gp244 | + | tctgatctgacAGGAGaccctc  | gtg | aggag   | 5  | putative ATPase domain protein                             | SSF52540, G3DSA:3.40.50.300                                                        |
| CcrColossus_gp245 | + | gaaactcctgaaagactgacc   | atg | None    | 0  | putative lipoprotein                                       | LipoP                                                                              |
| CcrColossus_gp246 | + | tgctccagatcaacggcatcca  | atg | None    | 0  | hypothetical conserved protein                             |                                                                                    |
| CcrColossus_gp247 | + | ggacaaatggaAGGtccaaga   | atg | agg     | 8  | putative elongation factor EF-Ts domain protein            | IPR014039                                                                          |
| CcrColossus_gp248 | + | tagaccacatcGGAGGccctg   | atg | ggagg   | 5  | hypothetical conserved protein                             |                                                                                    |
| CcrColossus_gp249 | + | ctccagcttctcaccctgctc   | gtg | None    | 0  | hypothetical novel protein                                 |                                                                                    |
| CcrColossus_gp250 | + | ggtcacgcttcgAGGAcgtcgc  | atg | agga    | 6  | hypothetical novel protein                                 |                                                                                    |
| CcrColossus_gp251 | + | cctGGAGGatgagtctgcctg   | atg | ggagg   | 13 | hypothetical novel protein                                 |                                                                                    |
| CcrColossus_gp252 | + | cacaacagAGGAGtttgtccc   | atg | aggag   | 8  | putative HTH domain DNA-binding protein                    | IPR001387, IPR010982, G3DSA:1.10.260.40                                            |
| CcrColossus_gp253 | + | tcagcggcgaAGGcggcctg    | atg | agg     | 7  | hypothetical novel protein                                 |                                                                                    |
| CcrColossus_gp254 | + | ctcatggcgtgaaagcactaa   | ttg | None    | 0  | hypothetical novel protein                                 |                                                                                    |
| CcrColossus_gp255 | + | ttgaaactGAGGctctagctc   | ttg | aggag   | 8  | hypothetical conserved protein                             |                                                                                    |
| CcrColossus_gp256 | + | gttctccgaAGGActaaagcc   | atg | agga    | 7  | putative ferritin-like protein                             | IPR012347, IPR003251, IPR009078                                                    |
| CcrColossus_gp257 | + | tgacgatcttaAGGAGaccct   | atg | aggag   | 5  | hypothetical novel protein                                 |                                                                                    |
| CcrColossus_gp258 | + | agttgcgGGAGccgtggcctg   | atg | ggagg   | 9  | hypothetical novel protein                                 |                                                                                    |
| CcrColossus_gp259 | + | ggacggaaAGGTgttcaaat    | ttg | aggt    | 9  | hypothetical conserved protein                             |                                                                                    |
| CcrColossus_gp260 | + | agtacGGAGcgcgcgtacgtc   | atg | ggag    | 12 | hypothetical novel protein                                 |                                                                                    |
| CcrColossus_gp261 | + | gacgatcacacGGAGGcaatc   | atg | ggagg   | 5  | hypothetical conserved protein                             |                                                                                    |
| CcrColossus_gp262 | + | gatgttcaaGGGAtcgcgcgc   | atg | gggg    | 8  | hypothetical novel protein                                 |                                                                                    |
| CcrColossus_gp263 | + | ccatGAGGcgttcgcgttctt   | ctg | gagg    | 13 | hypothetical novel protein                                 |                                                                                    |
| CcrColossus_gp264 | + | gttcgtgctGGAGgctgagc    | atg | ggagg   | 7  | hypothetical novel protein                                 |                                                                                    |
| CcrColossus_gp265 | + | acgatcaactGAGGAGTccc    | atg | aggaggt | 4  | DUF262 protein                                             | IPR004919                                                                          |
| CcrColossus_gp266 | + | cgagccgaAGGTgctgcgtg    | atg | aggt    | 9  | hypothetical conserved protein                             |                                                                                    |
| CcrColossus_gp267 | + | cagcccgaAGGAGTcgcctg    | atg | aggaggt | 5  | hypothetical novel protein                                 |                                                                                    |
| CcrColossus_gp268 | + | tgaacagaaAGGAGcttccgc   | atg | aggaggt | 7  | putative dehalogenase hydrolase-like protein               | IPR005833, IPR005834, SSF56784, PTHR12725, G3DSA:3.40.50.1000                      |
| CcrColossus_gp269 | + | ccctgaccGGAGctctcttga   | atg | ggag    | 9  | putative phosphoribosyltransferase-like domain protein     | SSF53271                                                                           |
| CcrColossus_gp270 | + | gtctaaactgacAGGTaaaacc  | atg | aggt    | 6  | hypothetical novel protein                                 |                                                                                    |
| CcrColossus_gp271 | + | gtgacgaagcAGGTcaaccgc   | atg | aggt    | 7  | hypothetical novel protein                                 |                                                                                    |
| CcrColossus_gp272 | + | gacccttccAGGAtaacccgc   | atg | agga    | 8  | hypothetical novel protein                                 |                                                                                    |
| CcrColossus_gp273 | + | ctaccaatcaacGGAGtcctc   | atg | ggag    | 5  | hypothetical novel protein                                 |                                                                                    |
| CcrColossus_gp274 | + | atcGAGGTcAGGAGTctagccc  | atg | gaggt   | 7  | putative TAT signal protein                                | IPR006311 ; PRED-TAT                                                               |
| CcrColossus_gp275 | + | caagctgaAGGgttcggtctg   | atg | agg     | 10 | hypothetical conserved protein                             |                                                                                    |
| CcrColossus_gp276 | + | tgaacggccttGGAGaagaca   | gtg | ggag    | 6  | hypothetical conserved protein                             | SSF56784, G3DSA:3.40.50.1000                                                       |
| CcrColossus_gp277 | + | gtttgatgcccgggtgctgca   | atg | None    | 0  | putative HNH endonuclease                                  | IPR002711                                                                          |
| CcrColossus_gp278 | + | agaaocagacggtggtggcct   | atg | None    | 0  | hypothetical novel protein                                 |                                                                                    |
| CcrColossus_gp279 | + | ctggaataagGGAGcctaacc   | ttg | ggag    | 7  | hypothetical conserved protein                             |                                                                                    |
| CcrColossus_gp280 | + | gttgatcgcggcgaacctctg   | atg | None    | 0  | hypothetical conserved protein                             |                                                                                    |
| CcrColossus_gp281 | + | tttcccgaatAGGAGctctgtt  | gtg | aggag   | 6  | hypothetical novel protein                                 |                                                                                    |
| CcrColossus_gp282 | + | tcgaaccgatcaagtagcgcc   | atg | None    | 0  | hypothetical novel protein                                 |                                                                                    |
| CcrColossus_gp283 | + | gctttgggtGGAcggtacca    | gtg | gga     | 9  | putative radical SAM-like protein                          | SSF102114, G3DSA:3.80.30.20                                                        |
| CcrColossus_gp284 | + | cggcatgttcatGGAGGcgtg   | atg | ggagg   | 4  | hypothetical novel protein                                 |                                                                                    |
| CcrColossus_gp285 | + | cgctgagatGGAatagaacc    | atg | gga     | 8  | hypothetical conserved protein                             |                                                                                    |
| CcrColossus_gp286 | + | tgtacgcgctGGAGGTgaag    | atg | ggaggt  | 4  | hypothetical novel protein                                 |                                                                                    |
| CcrColossus_gp287 | + | cgcgcaccggGGAGaatagaa   | atg | ggag    | 7  | hypothetical novel protein                                 |                                                                                    |
| CcrColossus_gp288 | + | caagctcagcAGGAGGcgcgcc  | atg | aggaggt | 5  | hypothetical novel protein                                 |                                                                                    |
| CcrColossus_gp289 | + | ccaaactggcAGGTggcggg    | atg | aggt    | 7  | putative tRNA nucleotidyl transferase                      | IPR002646, PTHR13734, SSF81301, G3DSA:3.30.460.10, G3DSA:1.10.3090.10              |
| CcrColossus_gp290 | + | gatcgtgatGGAGaatggac    | ttg | ggagg   | 7  | hypothetical novel protein                                 |                                                                                    |
| CcrColossus_gp291 | + | cgctggattGGAGccgccag    | atg | ggag    | 7  | hypothetical novel protein                                 |                                                                                    |
| CcrColossus_gp292 | + | cgaggcgcGGAGcggcgaatg   | atg | ggag    | 9  | hypothetical novel protein                                 |                                                                                    |
| CcrColossus_gp293 | + | cggtttGAGGTgttttaggg    | atg | gaggt   | 9  | hypothetical novel protein                                 |                                                                                    |
| CcrColossus_gp294 | + | caagccgaagaAGGcggcctg   | atg | agg     | 7  | hypothetical novel protein                                 |                                                                                    |
| CcrColossus_gp295 | + | tcctgggccGAGctgcaaccgc  | atg | gga     | 9  | hypothetical novel protein                                 |                                                                                    |
| CcrColossus_gp296 | + | acgatctcaaAGGAaggccct   | gtg | agga    | 7  | hypothetical conserved protein                             |                                                                                    |
| CcrColossus_gp297 | + | gagcagcggagcGGAGGaac    | atg | ggagg   | 4  | hypothetical conserved protein                             |                                                                                    |
| CcrColossus_gp298 | + | gatcaatcagaAGGAGTccc    | atg | aggaggt | 4  | hypothetical novel protein                                 |                                                                                    |
| CcrColossus_gp299 | + | ggcgcgcgcaAGGAGcaccac   | atg | agga    | 5  | hypothetical novel protein                                 |                                                                                    |
| CcrColossus_gp300 | + | caactcggcgggtGAGcgcctg  | atg | gga     | 6  | putative tRNA His guanylyltransferase protein              | IPR007537                                                                          |
| CcrColossus_gp301 | + | aacgcatgacAGGTgaagccg   | atg | aggt    | 7  | hypothetical novel protein                                 |                                                                                    |
| CcrColossus_gp302 | + | ccaaactgtAGGAGGTccag    | atg | aggaggt | 4  | hypothetical novel protein                                 |                                                                                    |
| CcrColossus_gp303 | + | gccgatggtcAGGcggcgcgc   | atg | gagg    | 7  | hypothetical novel protein                                 |                                                                                    |
| CcrColossus_gp304 | + | tgccgtGGAtcaagacgacga   | atg | gga     | 12 | hypothetical novel protein                                 |                                                                                    |

|                   |   |                         |     |        |    |                                          |                                        |
|-------------------|---|-------------------------|-----|--------|----|------------------------------------------|----------------------------------------|
| CcrColossus_gp305 | + | gggcctGGAGtggeatecgt    | gtg | gga    | 11 | hypothetical novel protein               |                                        |
| CcrColossus_gp306 | + | tactgacgacaAGGAGGcccc   | atg | aggagg | 4  | hypothetical novel protein               |                                        |
| CcrColossus_gp307 | + | cgccaaagAGGAGcgcgctg    | atg | agga   | 9  | hypothetical conserved protein           |                                        |
| CcrColossus_gp308 | + | cgggctGGAGGaacgctt      | atg | ggagg  | 10 | hypothetical novel protein               |                                        |
| CcrColossus_gp309 | + | caagctggcgatGGGgcgctg   | atg | gggg   | 5  | hypothetical novel protein               |                                        |
| CcrColossus_gp310 | + | taecatcgcaAGGAGcgcgctg  | atg | gga    | 6  | hypothetical novel protein               |                                        |
| CcrColossus_gp311 | + | ttcGGAGcgcggcgccccga    | atg | gga    | 14 | hypothetical novel protein               |                                        |
| CcrColossus_gp312 | + | accgaAGGAGcgcgctcagcct  | gtg | agga   | 12 | hypothetical novel protein               |                                        |
| CcrColossus_gp313 | + | aaagctttcAGGAGcaagaa    | gtg | gagg   | 7  | hypothetical novel protein               |                                        |
| CcrColossus_gp314 | + | gcaatctctggcagaccgca    | gtg | None   | 0  | hypothetical novel protein               |                                        |
| CcrColossus_gp315 | + | ataaacatgaAGGAGccccac   | atg | gga    | 5  | hypothetical novel protein               |                                        |
| CcrColossus_gp316 | + | ggctcgccttccaagagcc     | atg | None   | 0  | hypothetical novel protein               |                                        |
| CcrColossus_gp317 | + | gatcaatcagAGGAGccccac   | atg | aggag  | 6  | hypothetical novel protein               |                                        |
| CcrColossus_gp318 | + | tcctggctcgcgctcgaactgac | gtg | None   | 0  | hypothetical novel protein               |                                        |
| CcrColossus_gp319 | + | tgtgcaatccAGGAGGccccg   | atg | aggagg | 5  | hypothetical novel protein               |                                        |
| CcrColossus_gp320 | + | caacgccatGGAGGcttctc    | atg | ggagg  | 7  | hypothetical novel protein               |                                        |
| CcrColossus_gp321 | + | ccggctAGGTCggcgtctacg   | atg | aggt   | 11 | hypothetical novel protein               |                                        |
| CcrColossus_gp322 | + | cggcaccctcgccgctcgcgcg  | gtg | None   | 0  | hypothetical novel protein               |                                        |
| CcrColossus_gp323 | + | cgacgaaacgAGGAGGcaacc   | atg | aggagg | 5  | hypothetical novel protein               |                                        |
| CcrColossus_gp324 | + | cgctcgcctaaAGGAGcccc    | atg | agga   | 6  | hypothetical conserved protein           |                                        |
| CcrColossus_gp325 | + | cccttctggaaAGGAGctaat   | atg | aggag  | 5  | hypothetical novel protein               |                                        |
| CcrColossus_gp326 | + | tcgcaagctGGAGcgtgctc    | atg | gga    | 8  | hypothetical novel protein               |                                        |
| CcrColossus_gp327 | + | cgcaatttgAGGAGGcctga    | atg | aggagg | 5  | hypothetical novel protein               |                                        |
| CcrColossus_gp328 | + | tcagcaAGGAGTcaacccc     | atg | aggag  | 9  | hypothetical conserved protein           |                                        |
| CcrColossus_gp329 | + | cgtcaagaccgcgcgctcgtg   | atg | None   | 0  | hypothetical novel protein               |                                        |
| CcrColossus_gp330 | + | ctcctcgcggcgccgctaa     | atg | None   | 0  | putative methyltransferase               | SSF53335, G3DSA:3.40.50.150            |
| CcrColossus_gp331 | + | cctgatcaaaAGGAGcgcgctg  | gtg | aggag  | 6  | hypothetical novel protein               |                                        |
| CcrColossus_gp332 | + | cgtcctggcgcgctctgctc    | atg | None   | 0  | hypothetical novel protein               |                                        |
| CcrColossus_gp333 | + | ctccaaeccaaAGGAGcccc    | atg | aggag  | 5  | hypothetical conserved protein           |                                        |
| CcrColossus_gp334 | + | gcccggaaagaaAGGAGtaacc  | atg | gag    | 7  | hypothetical conserved protein           |                                        |
| CcrColossus_gp335 | + | ctcgggtgagggcgcgctcgg   | atg | None   | 0  | hypothetical novel protein               |                                        |
| CcrColossus_gp336 | + | tagcccgtaactAGGAGGcagc  | atg | aggagg | 4  | hypothetical novel protein               |                                        |
| CcrColossus_gp337 | + | tcgccagAGGAGccccgctgac  | atg | gga    | 10 | hypothetical novel protein               |                                        |
| CcrColossus_gp338 | + | atacagccatGGAGGctcct    | ttg | ggagg  | 5  | hypothetical conserved protein           |                                        |
| CcrColossus_gp339 | + | cttcaaggAGGAGcttctcctg  | atg | gga    | 9  | hypothetical novel protein               |                                        |
| CcrColossus_gp340 | + | caacctgaacctgcccattctg  | atg | None   | 0  | hypothetical conserved protein           |                                        |
| CcrColossus_gp341 | + | cgatcaatAGGAGGtaggtc    | atg | aggagg | 5  | hypothetical novel protein               |                                        |
| CcrColossus_gp342 | + | tttcgcaactgaAGGAGccta   | gtg | gga    | 4  | hypothetical novel protein               |                                        |
| CcrColossus_gp343 | + | cttctccgaaagatcaactg    | atg | None   | 0  | hypothetical novel protein               |                                        |
| CcrColossus_gp344 | + | cattcgcaaaAGGAGcgcgc    | atg | agga   | 8  | hypothetical conserved protein           |                                        |
| CcrColossus_gp345 | + | acgatcaaaAGGAGcccc      | atg | aggag  | 6  | hypothetical novel protein               |                                        |
| CcrColossus_gp346 | + | gttcatgAGGAGcgtagctccg  | atg | gga    | 10 | hypothetical conserved protein           |                                        |
| CcrColossus_gp347 | + | cgcgcgaaAGGAGctggcgca   | atg | aggag  | 8  | hypothetical novel protein               |                                        |
| CcrColossus_gp348 | + | cgctcagatcactGGGAGctgc  | atg | gggg   | 5  | hypothetical novel protein               |                                        |
| CcrColossus_gp349 | + | ccAGGgaaacAGGAGccccg    | atg | agg    | 8  | hypothetical novel protein               |                                        |
| CcrColossus_gp350 | + | atttgcgcgcttAGGAGctg    | atg | gag    | 4  | hypothetical novel protein               |                                        |
| CcrColossus_gp351 | + | gccaacctgaaAGGAGcgaacc  | atg | agg    | 7  | hypothetical conserved protein           |                                        |
| CcrColossus_gp352 | + | GGAGccccatAGGAGctgca    | gtg | gga    | 7  | hypothetical conserved protein           |                                        |
| CcrColossus_gp353 | + | tatgacctgaAGGAGgagtg    | atg | gagg   | 6  | hypothetical conserved protein           |                                        |
| CcrColossus_gp354 | + | tcagaagctgaagttcattgtg  | atg | None   | 0  | hypothetical novel protein               |                                        |
| CcrColossus_gp355 | + | octcgcAGGAGaaagcgtcg    | atg | gga    | 11 | hypothetical novel protein               |                                        |
| CcrColossus_gp356 | + | cgcataaaggAGGAGgctaa    | atg | ggagg  | 7  | hypothetical conserved protein           |                                        |
| CcrColossus_gp357 | + | cggtaaAGGAGtacaagtaac   | gtg | aggag  | 11 | hypothetical novel protein               |                                        |
| CcrColossus_gp358 | + | tcacagcaAGGAGcccc       | atg | aggagg | 6  | putative rRNA methyltransferase          | IPR004398, SSF53335, G3DSA:3.40.50.150 |
| CcrColossus_gp359 | + | tcatacgcgtgtGGAGcgcg    | atg | gga    | 6  | hypothetical novel protein               |                                        |
| CcrColossus_gp360 | + | taectGGAGGacgcaagcgtc   | atg | ggagg  | 11 | hypothetical novel protein               |                                        |
| CcrColossus_gp361 | + | gttagccaaAGGAGtaacc     | atg | gga    | 7  | hypothetical novel protein               |                                        |
| CcrColossus_gp362 | + | cccgatttgtcAGGAGctgag   | atg | agg    | 6  | hypothetical novel protein               |                                        |
| CcrColossus_gp363 | + | tcgccagcctGGAGtaacc     | atg | gga    | 6  | hypothetical novel protein               |                                        |
| CcrColossus_gp364 | - | gaacatgctGGAGgcgcgga    | gtg | ggagg  | 7  | hypothetical novel protein               |                                        |
| CcrColossus_gp365 | - | cgaaactgcccAGGAGtaacc   | gtg | gaggt  | 6  | hypothetical novel protein               |                                        |
| CcrColossus_gp366 | - | tgaagatgAGGAGcgcctcta   | atg | gga    | 8  | hypothetical novel protein               |                                        |
| CcrColossus_gp367 | - | ggcgcAGGAGgaagcgtgcta   | atg | gagg   | 12 | hypothetical novel protein               |                                        |
| CcrColossus_gp368 | - | cgtgaAGGAGctgcccgcga    | ctg | aggt   | 12 | hypothetical novel protein               |                                        |
| CcrColossus_gp369 | - | aaacaagaaAGGAGGctcgc    | atg | aggagg | 6  | hypothetical novel protein               |                                        |
| CcrColossus_gp370 | - | gctctatgagaAGGAGcccc    | atg | aggagg | 4  | hypothetical novel protein               |                                        |
| CcrColossus_gp371 | - | cAGGccccggtgtagcggcgcc  | atg | gag    | 17 | hypothetical conserved protein           |                                        |
| CcrColossus_gp372 | - | atacatcgtcAGGAGGctc     | atg | aggagg | 4  | hypothetical conserved protein           |                                        |
| CcrColossus_gp373 | - | tcaaecgcaagaaagaaagcca  | atg | None   | 0  | putative NAD GMP synthase domain protein | IPR014729, IPR022310                   |
| CcrColossus_gp374 | - | ccaaaaAGGAGaacgactctg   | atg | gggg   | 10 | hypothetical novel protein               |                                        |
| CcrColossus_gp375 | - | tgaagatcagAGGAGGcccc    | atg | aggagg | 4  | hypothetical conserved protein           |                                        |
| CcrColossus_gp376 | - | ggccgcccAGGAGcgcgctg    | atg | ggagg  | 7  | hypothetical novel protein               |                                        |
| CcrColossus_gp377 | - | cgaaacaaccAGGAGGcccc    | atg | aggagg | 5  | hypothetical novel protein               |                                        |
| CcrColossus_gp378 | - | caagaAGGAGcagcgtgctcgc  | atg | agga   | 12 | hypothetical novel protein               |                                        |
| CcrColossus_gp379 | - | cgcgctcccAGGAGccccgccc  | atg | aggag  | 7  | hypothetical novel protein               |                                        |
| CcrColossus_gp380 | + | ccattaaacatAGGAGcgcgac  | atg | gagg   | 5  | hypothetical novel protein               |                                        |
| CcrColossus_gp381 | - | cccgcAGGAGGaaacgccta    | atg | aggagg | 10 | hypothetical novel protein               |                                        |

|                   |   |                        |     |        |    |                                         |                                                                                                                   |
|-------------------|---|------------------------|-----|--------|----|-----------------------------------------|-------------------------------------------------------------------------------------------------------------------|
| CcrColossus_gp382 | - | cgcgacgcgcctGGAcgaatg  | atg | gga    | 6  | hypothetical novel protein              |                                                                                                                   |
| CcrColossus_gp383 | - | gtggcgtgacAGGAGGcttat  | atg | aggagg | 5  | hypothetical novel protein              |                                                                                                                   |
| CcrColossus_gp384 | - | ctgccgacGGAGTctctgacgc | atg | ggag   | 9  | hypothetical novel protein              |                                                                                                                   |
| CcrColossus_gp385 | - | acagcgaatAGGAGatcagg   | atg | aggag  | 6  | hypothetical conserved protein          |                                                                                                                   |
| CcrColossus_gp386 | - | tggacgaaacacAGGAGGccct | atg | aggagg | 4  | hypothetical novel protein              |                                                                                                                   |
| CcrColossus_gp387 | + | aaaaacggctattccacctac  | atg | None   | 0  | hypothetical novel protein              |                                                                                                                   |
| CcrColossus_gp388 | + | caaatggcttgaAGGTaaacc  | atg | aggt   | 5  | hypothetical novel protein              |                                                                                                                   |
| CcrColossus_gp389 | + | taagtctgtgtGGAcctctg   | atg | gga    | 6  | hypothetical novel protein              |                                                                                                                   |
| CcrColossus_gp390 | + | ggtagcgcctGGActccca    | atg | gga    | 6  | hypothetical novel protein              |                                                                                                                   |
| CcrColossus_gp391 | + | cgaggcgcGGAGGcgcgagt   | atg | ggag   | 9  | hypothetical conserved protein          |                                                                                                                   |
| CcrColossus_gp392 | + | cctattGGAcGGAAacgcac   | atg | gga    | 7  | hypothetical conserved protein          |                                                                                                                   |
| CcrColossus_gp393 | + | tttgaagaAGGctcaaacct   | gtg | agg    | 9  | hypothetical novel protein              |                                                                                                                   |
| CcrColossus_gp394 | + | ctcctgcccaacAGGAcgcca  | atg | aggag  | 6  | hypothetical novel protein              |                                                                                                                   |
| CcrColossus_gp395 | + | ccgAGGAGatgaccgagaccg  | atg | aggag  | 13 | hypothetical novel protein              |                                                                                                                   |
| CcrColossus_gp396 | + | ctgaagctGAGTccgcttag   | atg | gag    | 9  | hypothetical novel protein              |                                                                                                                   |
| CcrColossus_gp397 | + | ctcctgctgaaGAGTaccacg  | atg | gag    | 7  | hypothetical conserved protein          |                                                                                                                   |
| CcrColossus_gp398 | + | tcttcgacaactGAGGgtaca  | atg | gagg   | 5  | hypothetical novel protein              |                                                                                                                   |
| CcrColossus_gp399 | + | cacctcgtcacggtggagct   | atg | None   | 0  | hypothetical novel protein              |                                                                                                                   |
| CcrColossus_gp400 | + | cctcctGGAGtattgagccg   | atg | ggag   | 10 | hypothetical novel protein              |                                                                                                                   |
| CcrColossus_gp401 | - | tctgcccagGGAcaaccgcc   | atg | gga    | 9  | hypothetical novel protein              |                                                                                                                   |
| CcrColossus_gp402 | - | acgtggtcgaaacAGGAaggcg | atg | aggag  | 5  | hypothetical novel protein              |                                                                                                                   |
| CcrColossus_gp403 | - | cgtgaccctGAGGtggtctc   | gtg | gagg   | 6  | hypothetical novel protein              |                                                                                                                   |
| CcrColossus_gp404 | - | gattaaagccgAGGAGGcatg  | atg | aggagg | 4  | hypothetical novel protein              |                                                                                                                   |
| CcrColossus_gp405 | - | cgcgctcatgatGGActgctg  | atg | gga    | 6  | hypothetical conserved protein          |                                                                                                                   |
| CcrColossus_gp406 | - | gctgaagcAGGcgctccgca   | atg | agg    | 10 | hypothetical novel protein              |                                                                                                                   |
| CcrColossus_gp407 | - | cccgctgtGGAGatcaagaa   | gtg | ggag   | 8  | hypothetical novel protein              |                                                                                                                   |
| CcrColossus_gp408 | - | ccttgccctGGAGccgccc    | atg | ggagg  | 7  | hypothetical novel protein              |                                                                                                                   |
| CcrColossus_gp409 | - | cctgtagaAGGTcaagctg    | atg | aggt   | 8  | hypothetical novel protein              |                                                                                                                   |
| CcrColossus_gp410 | - | cggagagaAGGAcceacgctg  | gtg | aggag  | 9  | hypothetical novel protein              |                                                                                                                   |
| CcrColossus_gp411 | - | gacgatcaagAGGAcccccg   | atg | aggag  | 6  | hypothetical novel protein              |                                                                                                                   |
| CcrColossus_gp412 | - | caagaagaaacAGGcctcgc   | atg | gagg   | 6  | hypothetical novel protein              |                                                                                                                   |
| CcrColossus_gp413 | - | ccgcgctgacGGAGGaaaggca | atg | ggagg  | 6  | hypothetical novel protein              |                                                                                                                   |
| CcrColossus_gp414 | - | ctacgtcgaaAGGAaccctg   | atg | aggag  | 6  | hypothetical novel protein              |                                                                                                                   |
| CcrColossus_gp415 | - | tgtcggcctGGAGGaatca    | ttg | ggagg  | 6  | hypothetical novel protein              |                                                                                                                   |
| CcrColossus_gp416 | - | gcagatcaactAGGAGaacctg | atg | aggag  | 6  | hypothetical novel protein              |                                                                                                                   |
| CcrColossus_gp417 | - | tcgagcgcGAGGcgcgctgaa  | gtg | gagg   | 10 | hypothetical conserved protein          | PF09356                                                                                                           |
| CcrColossus_gp418 | - | gtatgtctGGAGaaataacg   | atg | ggag   | 8  | hypothetical novel protein              |                                                                                                                   |
| CcrColossus_gp419 | - | cgtgacgcgctgtgtgctgcc  | gtg | None   | 0  | hypothetical novel protein              |                                                                                                                   |
| CcrColossus_gp420 | - | cgccgcacaagAGGAatcatg  | atg | gga    | 6  | hypothetical novel protein              |                                                                                                                   |
| CcrColossus_gp421 | - | ttcccgaAGGAGcctgatcc   | atg | aggagg | 8  | hypothetical novel protein              |                                                                                                                   |
| CcrColossus_gp422 | - | cgacgaagcaAGGAGccccg   | atg | aggag  | 6  | hypothetical novel protein              |                                                                                                                   |
| CcrColossus_gp423 | - | gattaaacaAGGAGGgctccg  | atg | aggagg | 6  | hypothetical novel protein              |                                                                                                                   |
| CcrColossus_gp424 | - | cacctggagaAGGAgcctg    | atg | aggag  | 6  | putative HTH domain DNA-binding protein | IPR001387, IPR010982, PTHR10245, G3DSA:1.10.260.40                                                                |
| CcrColossus_gp425 | - | gtacctgctgGAGGaaagagc  | gtg | ggag   | 7  | hypothetical novel protein              |                                                                                                                   |
| CcrColossus_gp426 | - | gctggtctGGAagcgcgagca  | atg | gga    | 10 | hypothetical novel protein              |                                                                                                                   |
| CcrColossus_gp427 | - | aactcgtccccAGGAGccccg  | atg | aggagg | 5  | hypothetical novel protein              |                                                                                                                   |
| CcrColossus_gp428 | - | ccggctgtacAGGTCgagt    | atg | gagg   | 6  | hypothetical novel protein              |                                                                                                                   |
| CcrColossus_gp429 | - | ccctaactccacgAGGAcatg  | atg | aggag  | 4  | hypothetical novel protein              |                                                                                                                   |
| CcrColossus_gp430 | - | cgttgcgaatgaAGGTgtgctg | atg | aggt   | 5  | hypothetical novel protein              |                                                                                                                   |
| CcrColossus_gp431 | - | cgatctgcGAGGatgatcgg   | atg | ggag   | 8  | hypothetical novel protein              |                                                                                                                   |
| CcrColossus_gp432 | - | gccgatcgttgaagcgcg     | atg | None   | 0  | hypothetical novel protein              |                                                                                                                   |
| CcrColossus_gp433 | - | ggtcgcctGAGcgtgctgctg  | atg | gag    | 9  | hypothetical novel protein              |                                                                                                                   |
| CcrColossus_gp434 | - | taacttcaacaAGGAGGcacc  | atg | aggagg | 4  | hypothetical novel protein              |                                                                                                                   |
| CcrColossus_gp435 | - | gacgatcaataAGGAGcccc   | atg | aggag  | 5  | hypothetical novel protein              |                                                                                                                   |
| CcrColossus_gp436 | - | gtggcgtccaAGGcgcaatc   | atg | agg    | 7  | hypothetical novel protein              |                                                                                                                   |
| CcrColossus_gp437 | - | gacggaaagatcAGTgctgctg | ctg | gag    | 7  | hypothetical novel protein              |                                                                                                                   |
| CcrColossus_gp438 | - | agcgtaggctAGGAGGggttc  | atg | aggagg | 5  | hypothetical novel protein              |                                                                                                                   |
| CcrColossus_gp439 | - | cgggatgctAGGcggttctc   | atg | agg    | 8  | hypothetical novel protein              |                                                                                                                   |
| CcrColossus_gp440 | + | aaactccgacAGGAttaaccg  | atg | aggag  | 7  | hypothetical conserved protein          |                                                                                                                   |
| CcrColossus_gp441 | + | cagttaacgctttcAGGtccc  | atg | agg    | 4  | hypothetical conserved protein          |                                                                                                                   |
| CcrColossus_gp442 | + | ggcggccaacGGAGccgctg   | atg | ggag   | 7  | hypothetical novel protein              |                                                                                                                   |
| CcrColossus_gp443 | + | ccgcgaaagAGGAGcctgcgca | atg | aggagg | 7  | hypothetical novel protein              |                                                                                                                   |
| CcrColossus_gp444 | + | tgtctctgtgtgtatcaactg  | atg | None   | 0  | putative RNaseH-like domain protein     | IPR012337                                                                                                         |
| CcrColossus_gp445 | + | tatcctggtGGAGtccctaa   | ttg | ggag   | 8  | hypothetical conserved protein          |                                                                                                                   |
| CcrColossus_gp446 | + | cgccggcccGGAcaagacgcc  | atg | gga    | 9  | hypothetical novel protein              |                                                                                                                   |
| CcrColossus_gp447 | + | gcctatgcgaaagtaaaagaca | ttg | None   | 0  | putative terminase small subunit        | HHpred vs pdb70_18Aug12, hit 3zap_A, prob 97.8% E=8.3E-06; position relative to terminase large subunit, see text |
| CcrColossus_gp448 | + | cggcgacgacgaataaccac   | atg | None   | 0  | putative terminase large subunit        | IPR004921, IPR003587, IPR006141, IPR006517, IPR004042, SSF51294, G3DSA:2.170.16.10, G3DSA:3.10.28.10              |
